# Supplementary material
Source: MDPI journal article supplement (https://www.mdpi.com/2073-4344/13/2/389)
Supplement: s1 [file s1]

# Effect of Alkoxy Substituents on the Regioselectivity of Catalytic C-H Activation in Benzoic Acids: Experimental and DFT Study

Vladimir B. Kharitonov <sup>1</sup>, Dmitry V. Muratov <sup>1</sup>, Yulia V. Nelyubina <sup>1</sup> and Dmitry A. Loginov

Supporting information

## Table of contents

|                                                       |     |
|-------------------------------------------------------|-----|
| 1. Copies of NMR spectra                              | S2  |
| 2. Calculated energy profiles                         | S10 |
| 3. Optimized geometries                               | S13 |
| 4. Theoretical molecular graphs for transition states | S79 |

# 1. Copies of NMR spectra

$^1\text{H}$  NMR (400 MHz) spectrum of **3aa** in  $\text{CDCl}_3$

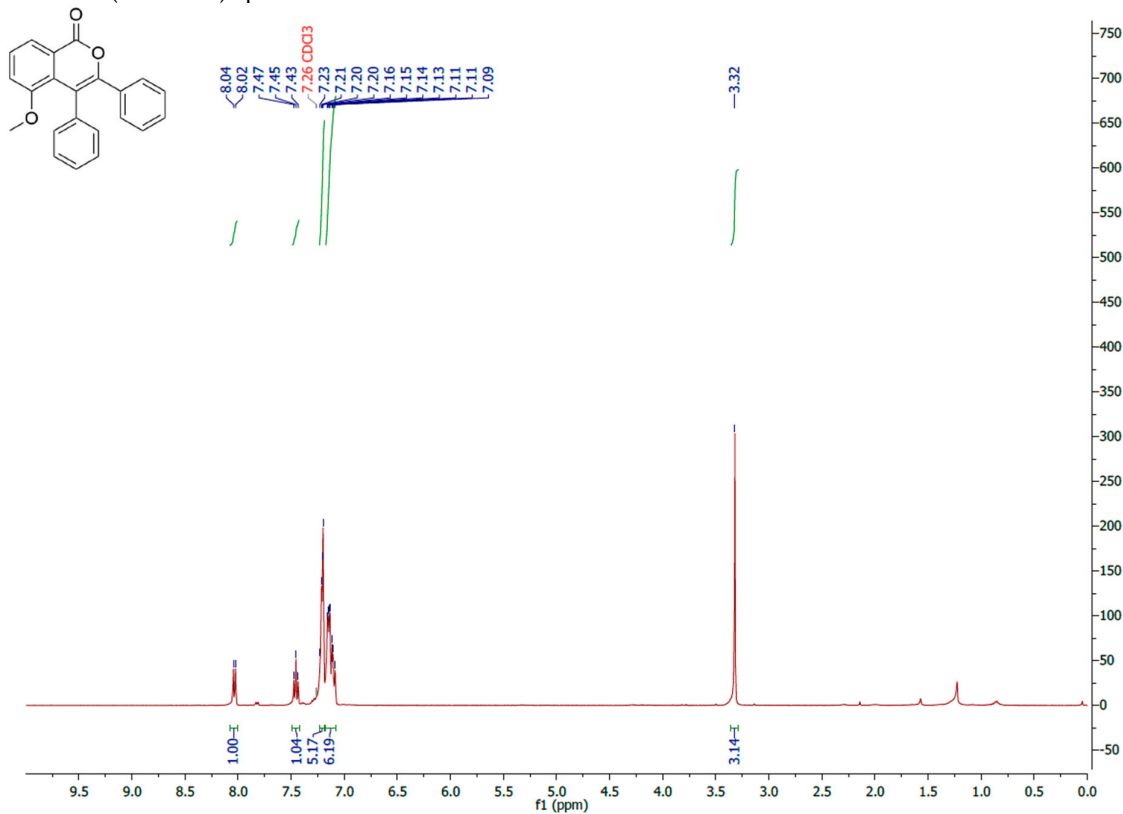

$^{13}\text{C}\{^1\text{H}\}$  NMR (101 MHz) spectrum of **3aa** in  $\text{CDCl}_3$

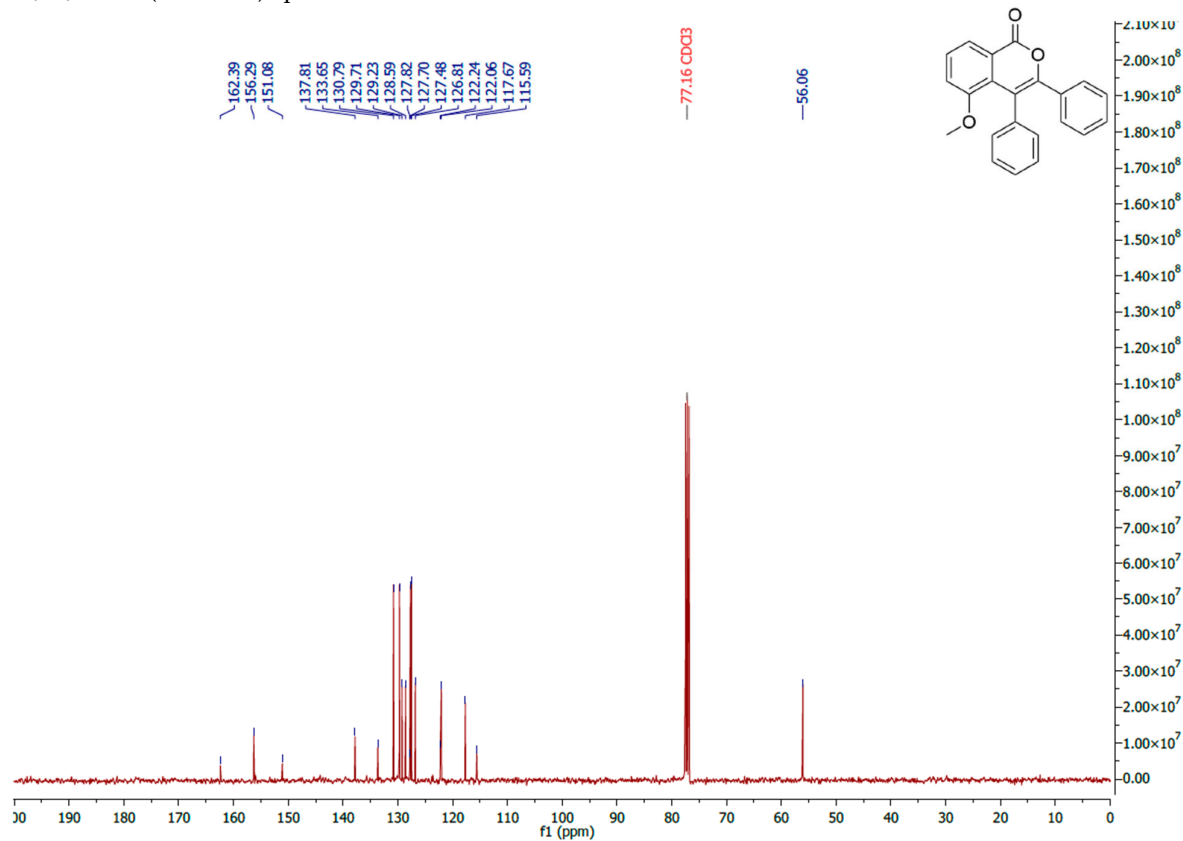

$^1\text{H}$  NMR (400 MHz) spectrum of **3aa'** in  $\text{CDCl}_3$

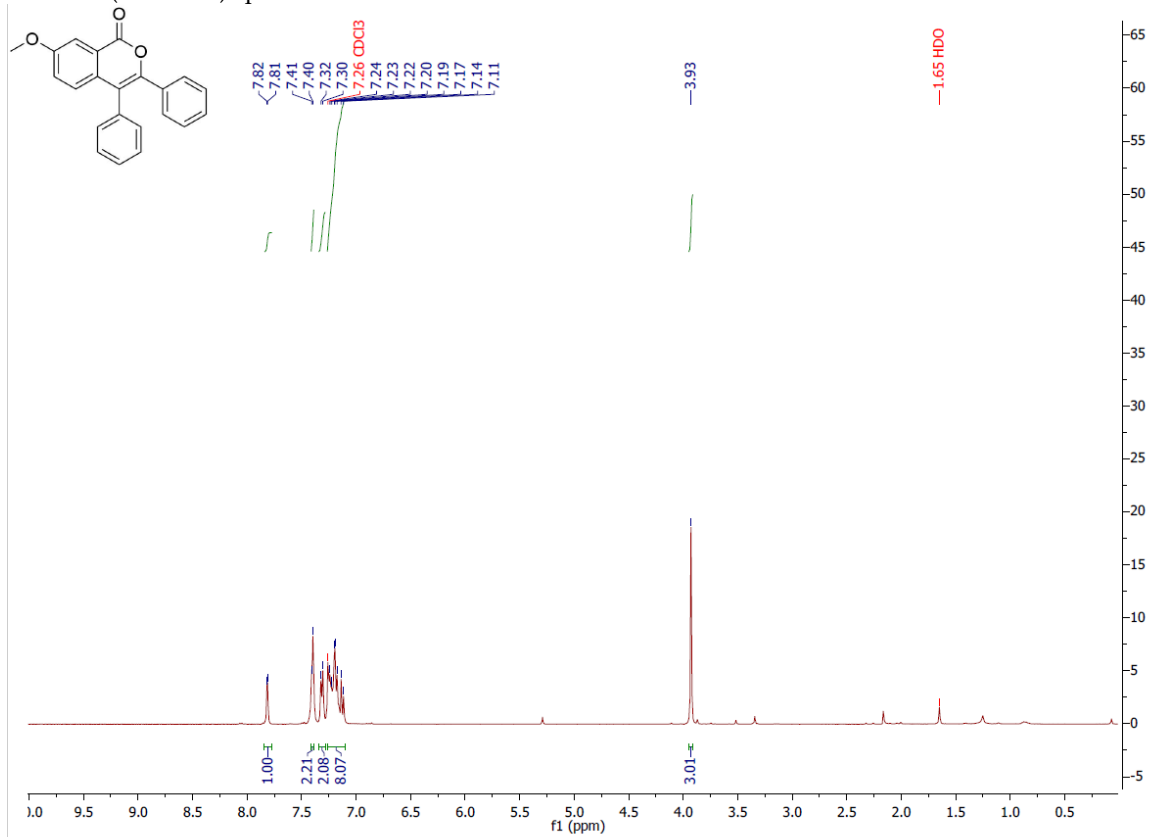

$^{13}\text{C}\{^1\text{H}\}$  NMR (101 MHz) spectrum of **3aa'** in  $\text{CDCl}_3$

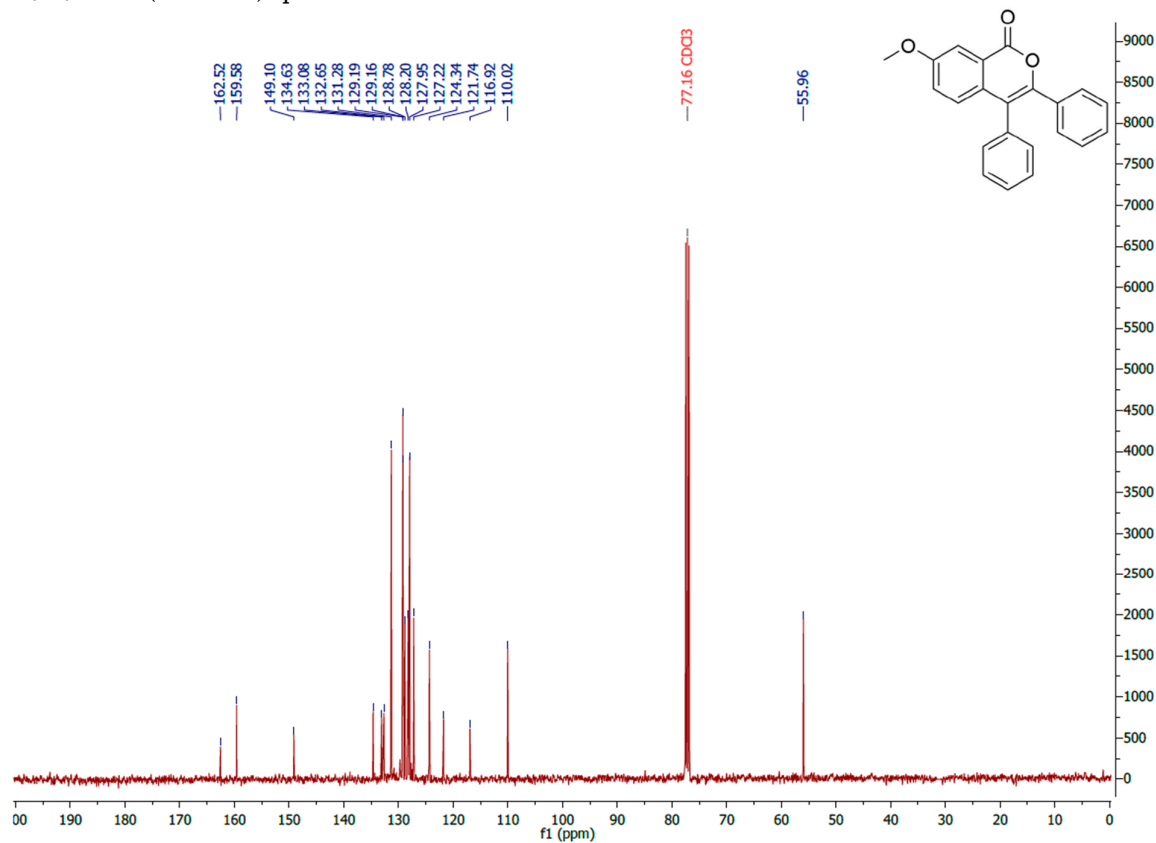

$^1\text{H}$  NMR (400 MHz) spectrum of **3ab** in  $\text{CDCl}_3$

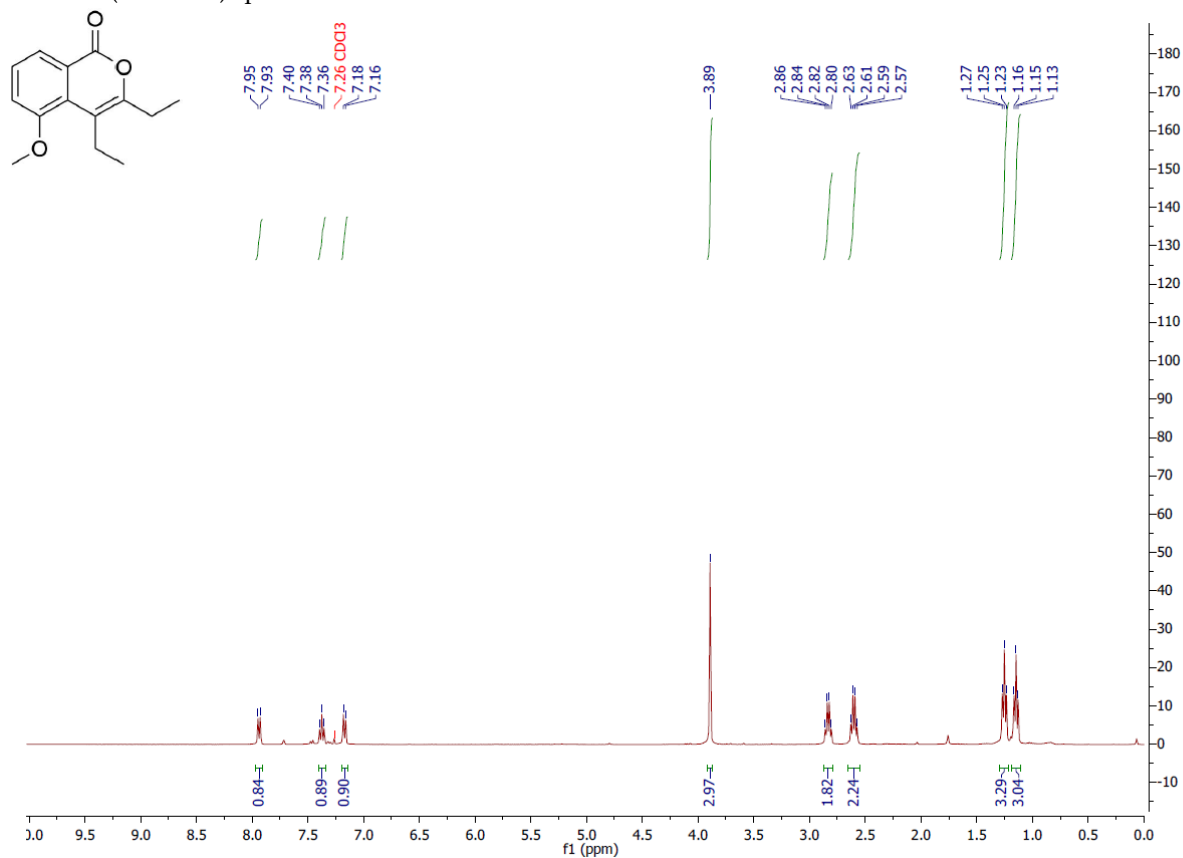

$^{13}\text{C}\{^1\text{H}\}$  NMR (101 MHz) spectrum of **3ab'** in  $\text{CDCl}_3$

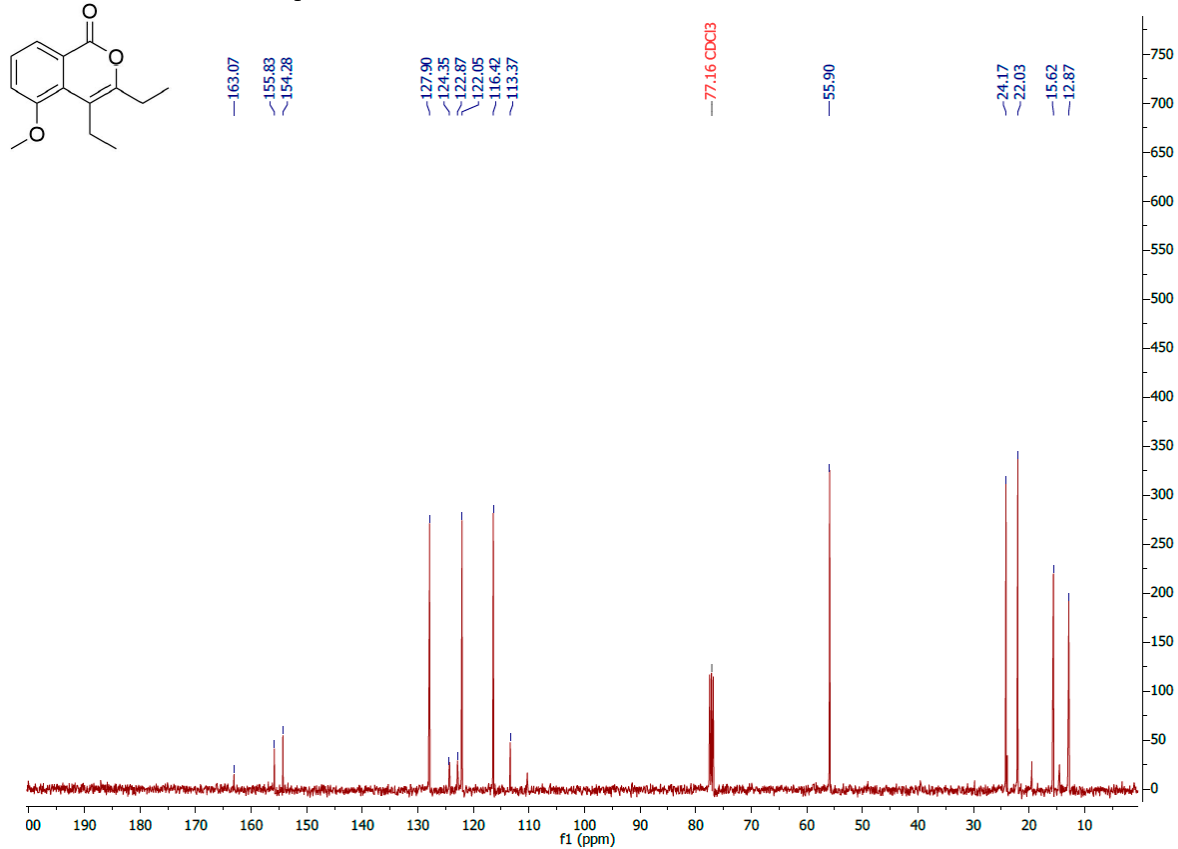

$^1\text{H}$  NMR (400 MHz) spectrum of **3ab'** in  $\text{CDCl}_3$

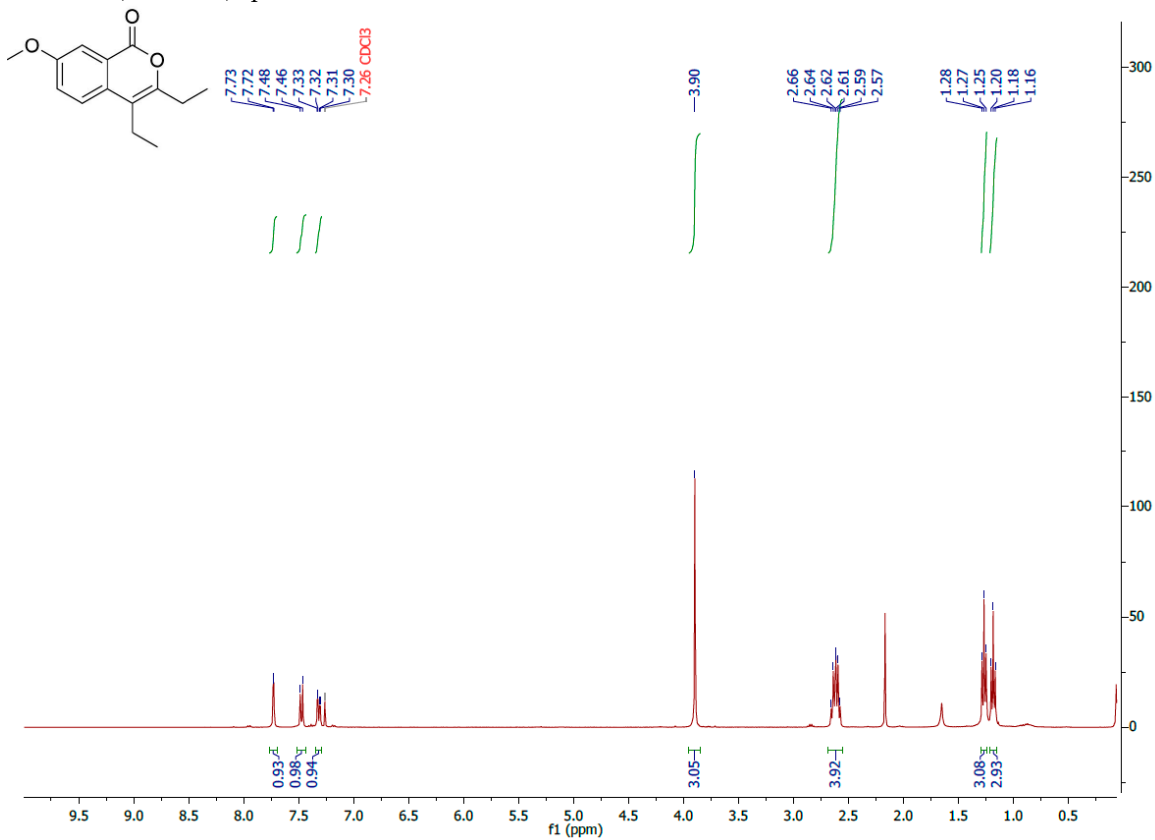

$^{13}\text{C}\{^1\text{H}\}$  NMR (101 MHz) spectrum of **3ab'** in  $\text{CDCl}_3$

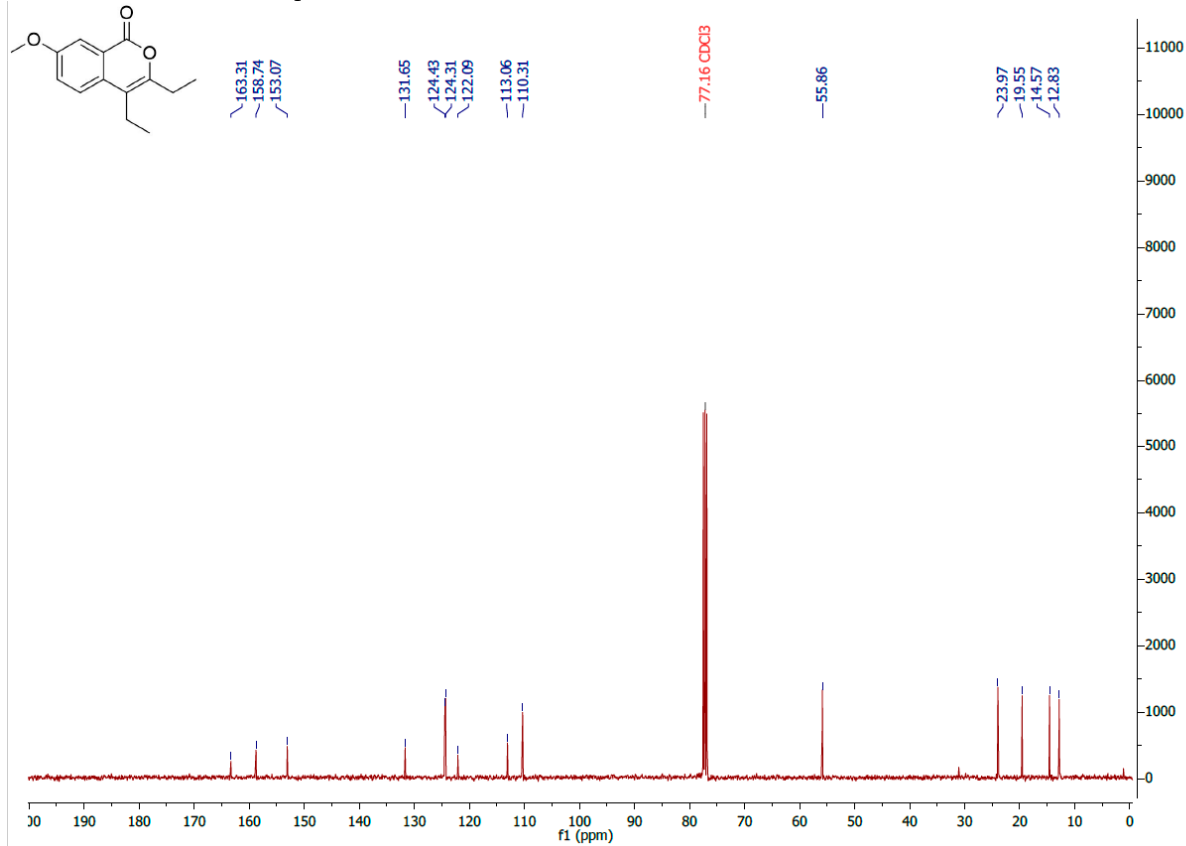

$^1\text{H}$  NMR (400 MHz) spectrum of **3ba'** in  $\text{CDCl}_3$

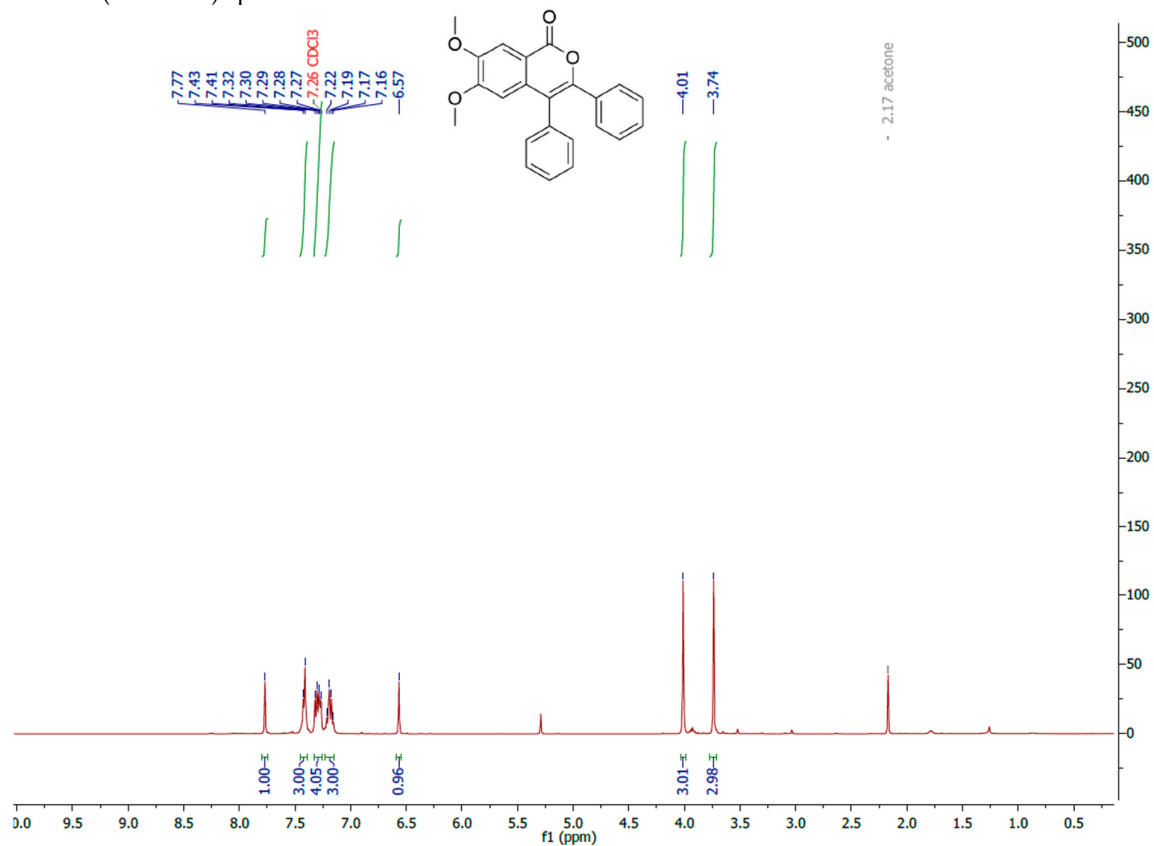

$^{13}\text{C}\{^1\text{H}\}$  NMR (101 MHz) spectrum of **3ba'** in  $\text{CDCl}_3$

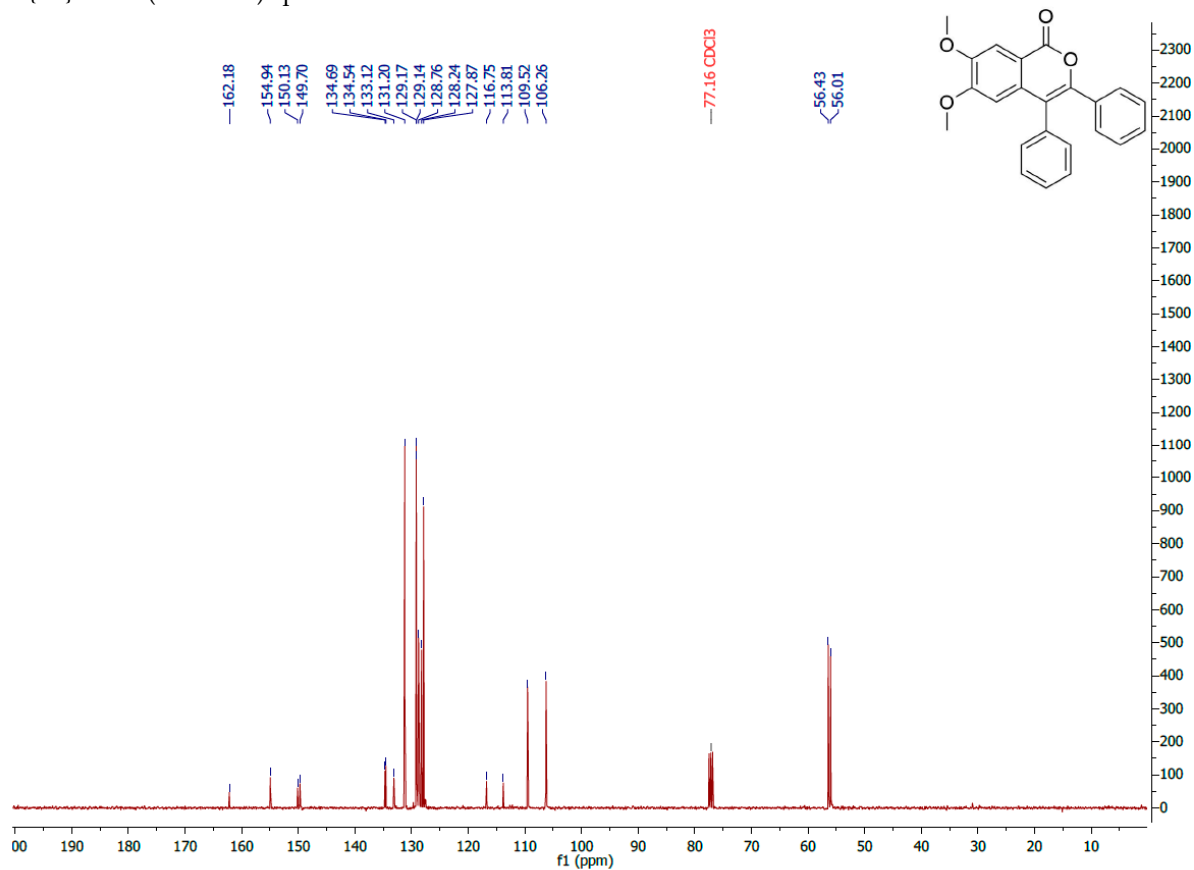

$^1\text{H}$  NMR (400 MHz) spectrum of **3bb'** in  $\text{CDCl}_3$

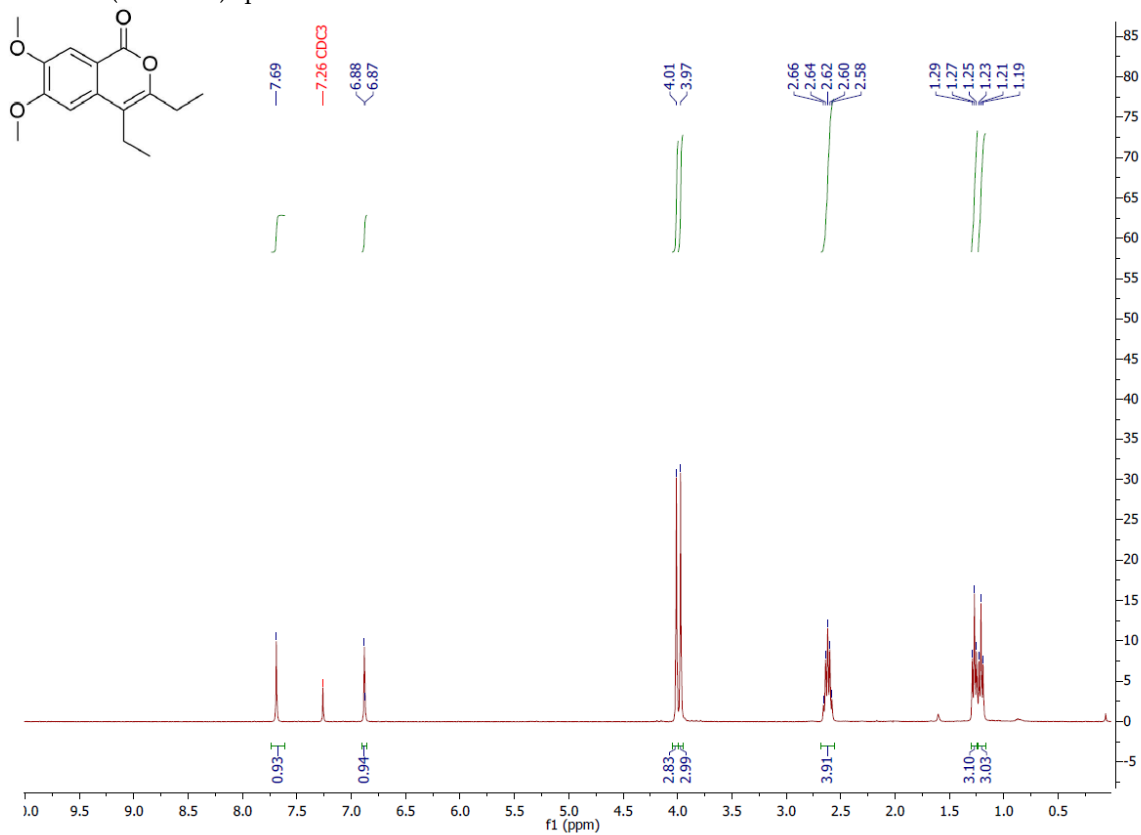

$^{13}\text{C}\{^1\text{H}\}$  NMR (101 MHz) spectrum of **3bb'** in  $\text{CDCl}_3$

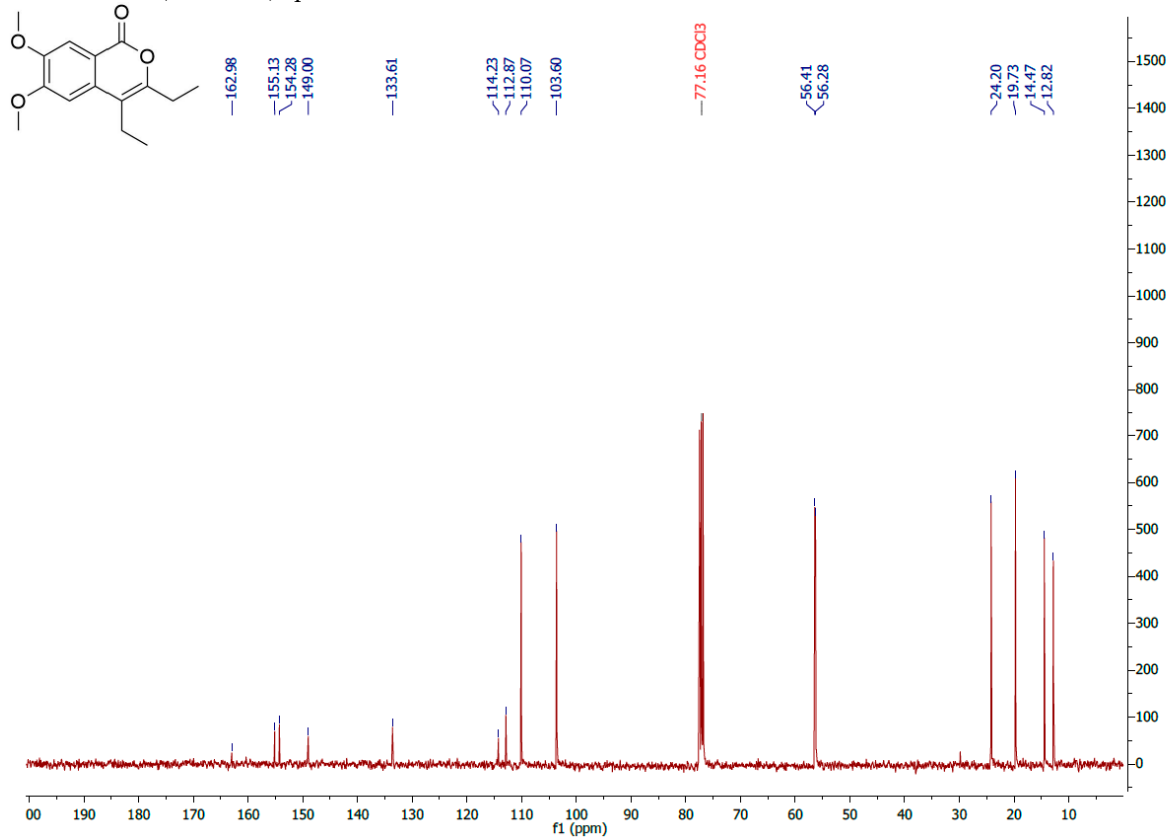

$^1\text{H}$  NMR (400 MHz) spectrum of **3ca** in  $\text{CDCl}_3$

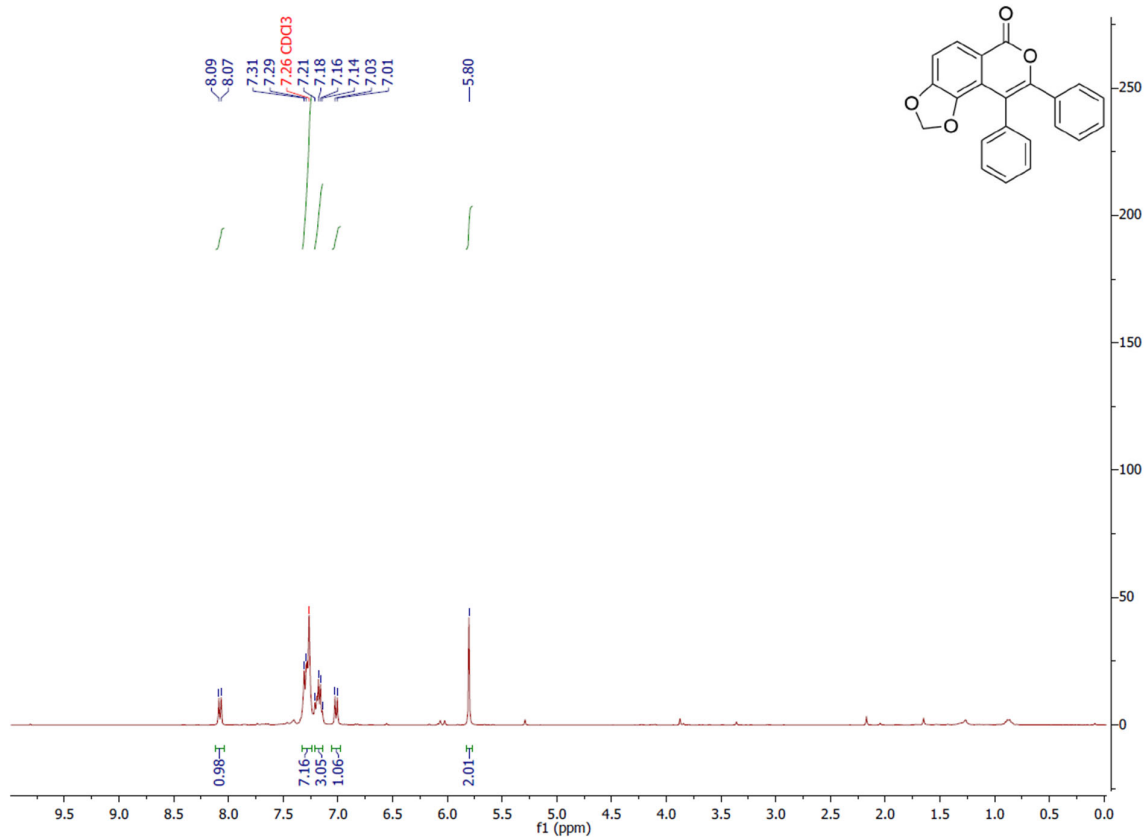

$^{13}\text{C}\{^1\text{H}\}$  NMR (101 MHz) spectrum of **3ca** in  $\text{CDCl}_3$

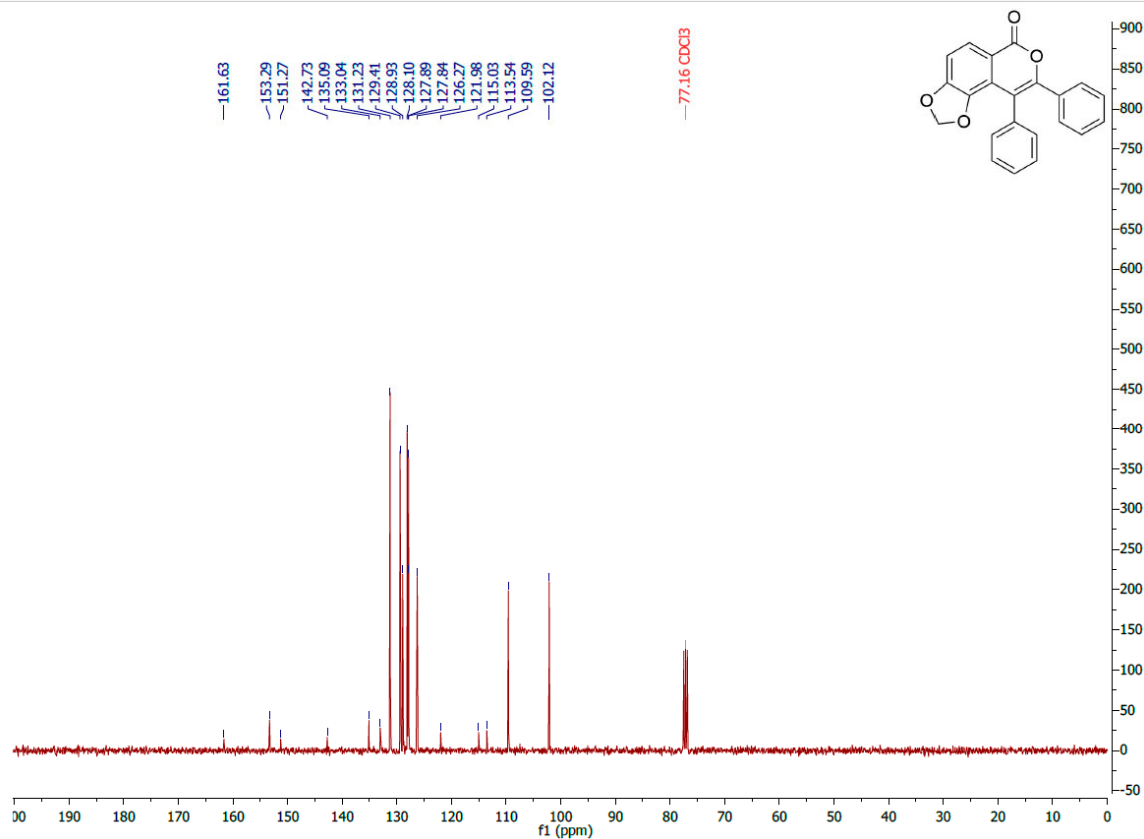



$^1\text{H}$  NMR (400 MHz) spectrum of **3cb** in  $\text{CDCl}_3$

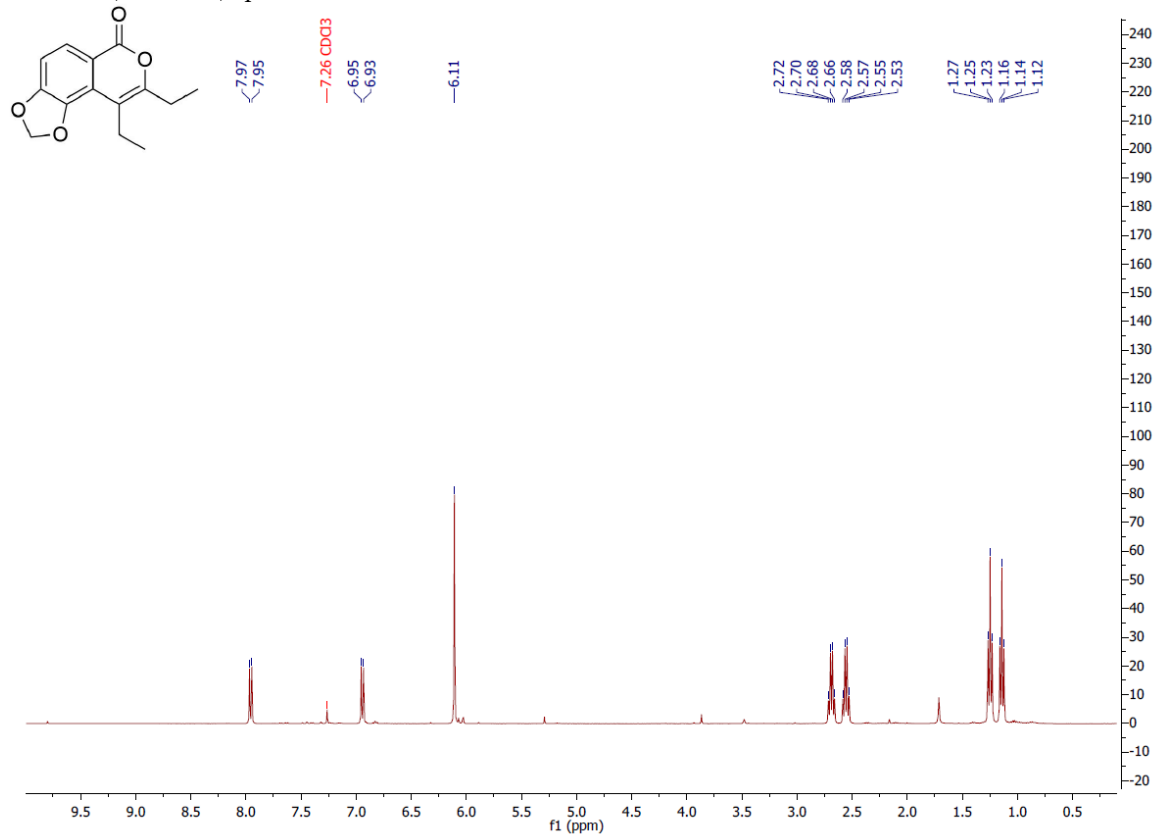

$^{13}\text{C}\{^1\text{H}\}$  NMR (101 MHz) spectrum of **3cb'** in  $\text{CDCl}_3$

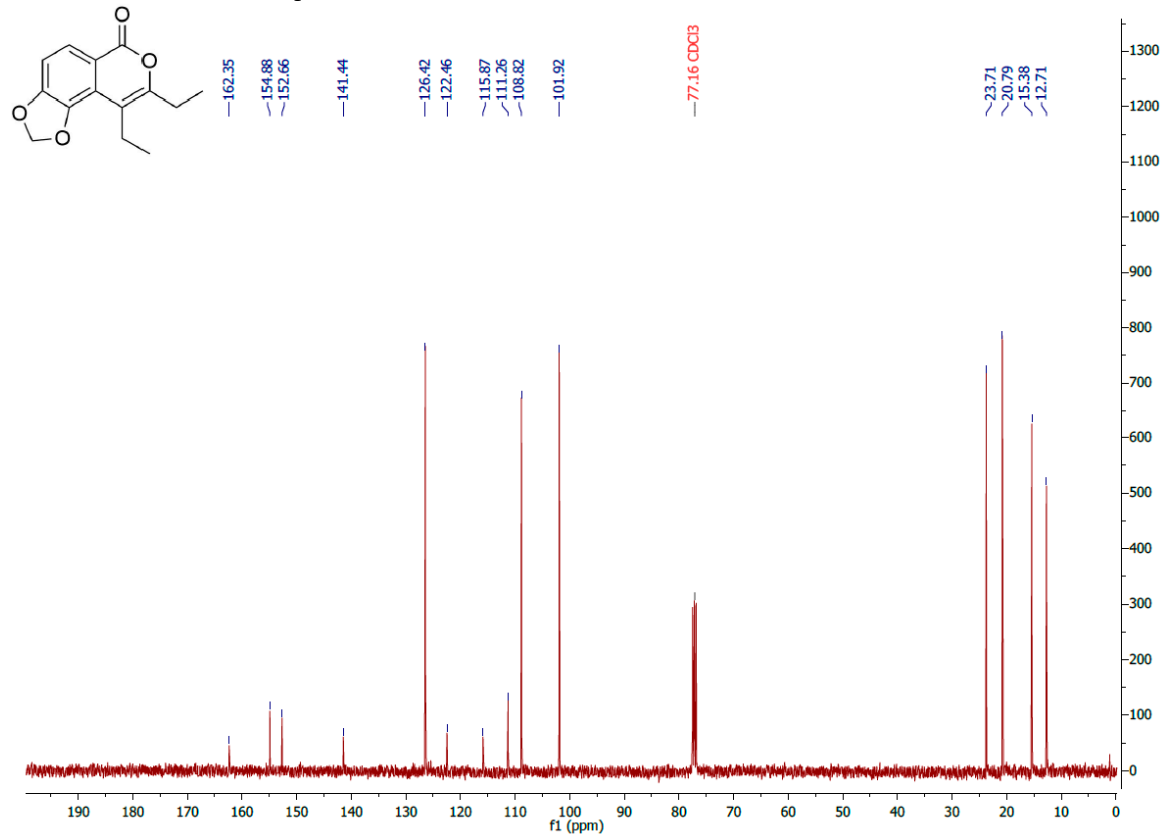

## 2. Calculated energy profiles

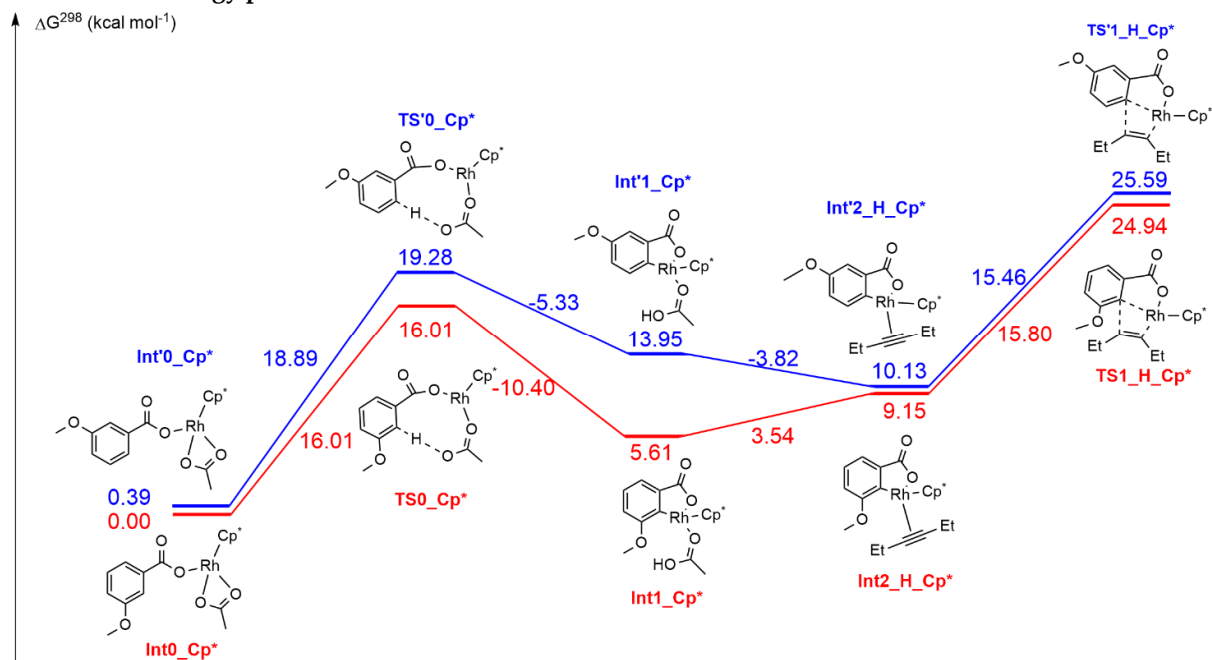

**Figure S1.** Energy profiles of C-H activation and alkyne insertion steps for the annulation of **1a** with diethylacetylene catalyzed by  $[\text{Cp}^*\text{RhCl}_2]_2$ . The calculated Gibbs free energies are given relative to intermediate **Int0\_Cp\*** at the M06L(D3)/LANL2DZ level with CPCM correction for methanol solvation (in kcal·mol<sup>-1</sup>, at 298 K).

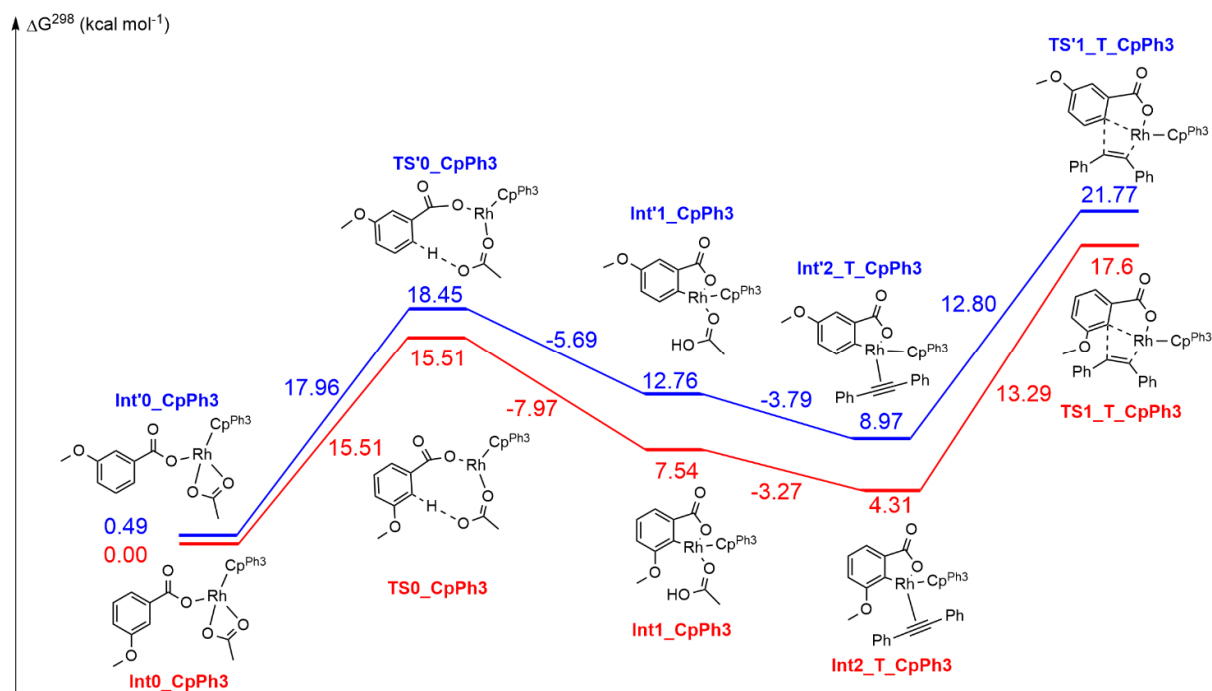

**Figure S2.** Energy profiles of C-H activation and alkyne insertion steps for the annulation of **1a** with diphenylacetylene catalyzed by  $[\text{Cp}^{\text{Ph}_3}\text{RhI}_2]_2$ . The calculated Gibbs free energies are given relative to intermediate **Int0\_CpPh3** at the M06L(D3)/LANL2DZ level with CPCM correction for methanol solvation (in kcal·mol<sup>-1</sup>, at 298 K).

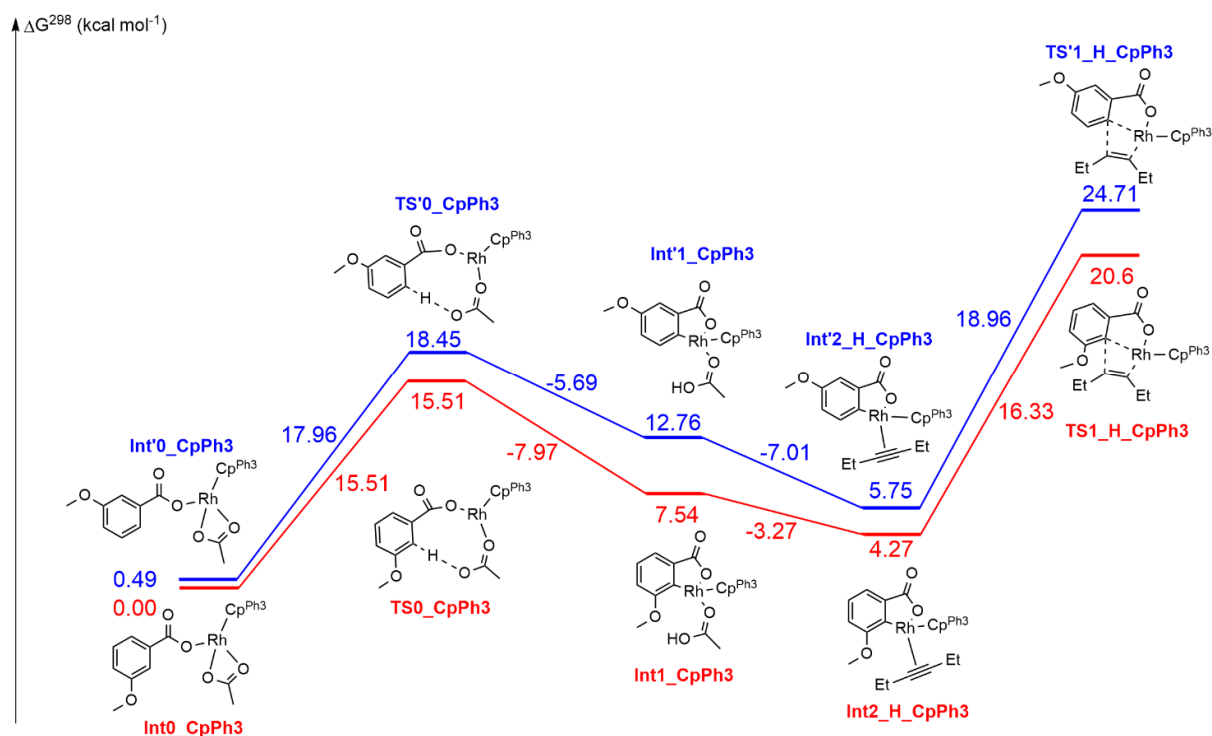

**Figure S3.** Energy profiles of C-H activation and alkyne insertion steps for the annulation of **1a** with diethylacetylene catalyzed by  $[\text{Cp}^{\text{Ph}_3}\text{RhI}_2]_2$ . The calculated Gibbs free energies are given relative to intermediate **Int0\_CpPh3** at the M06L(D3)/LANL2DZ level with CPCM correction for methanol solvation (in  $\text{kcal}\cdot\text{mol}^{-1}$ , at 298 K).

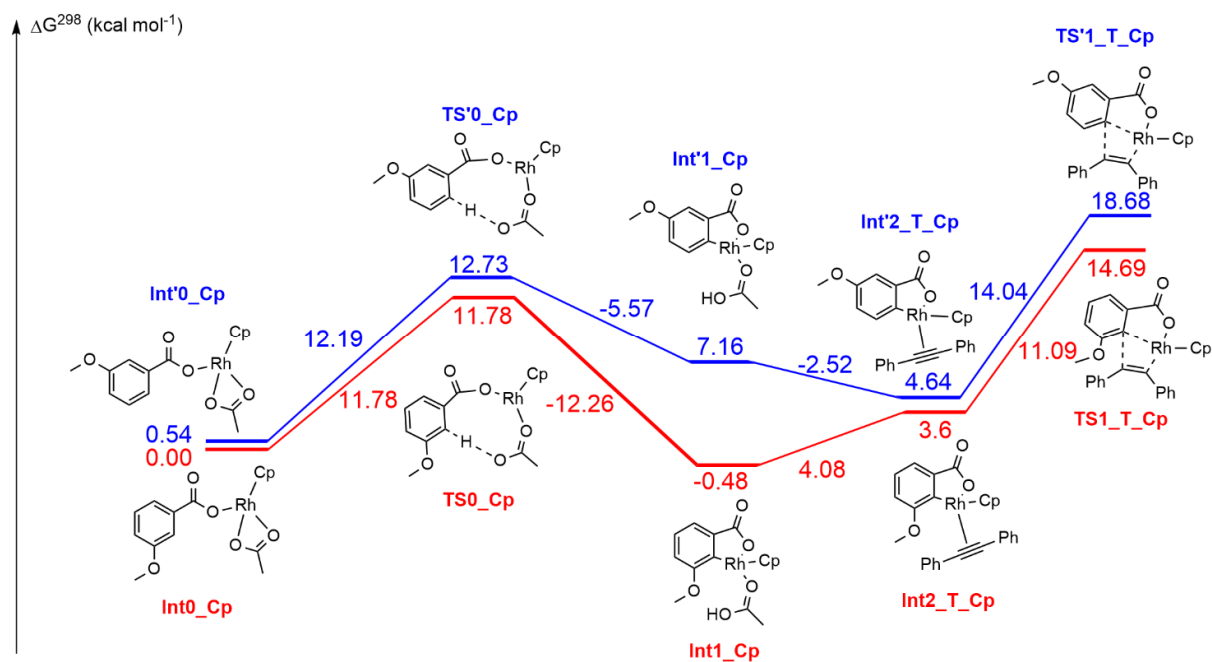

**Figure S4.** Energy profiles of C-H activation and alkyne insertion steps for the annulation of **1a** with diphenylacetylene catalyzed by  $[\text{CpRhI}_2]_n$ . The calculated Gibbs free energies are given relative to intermediate **Int0\_Cp** at the M06L(D3)/LANL2DZ level with CPCM correction for methanol solvation (in  $\text{kcal}\cdot\text{mol}^{-1}$ , at 298 K).

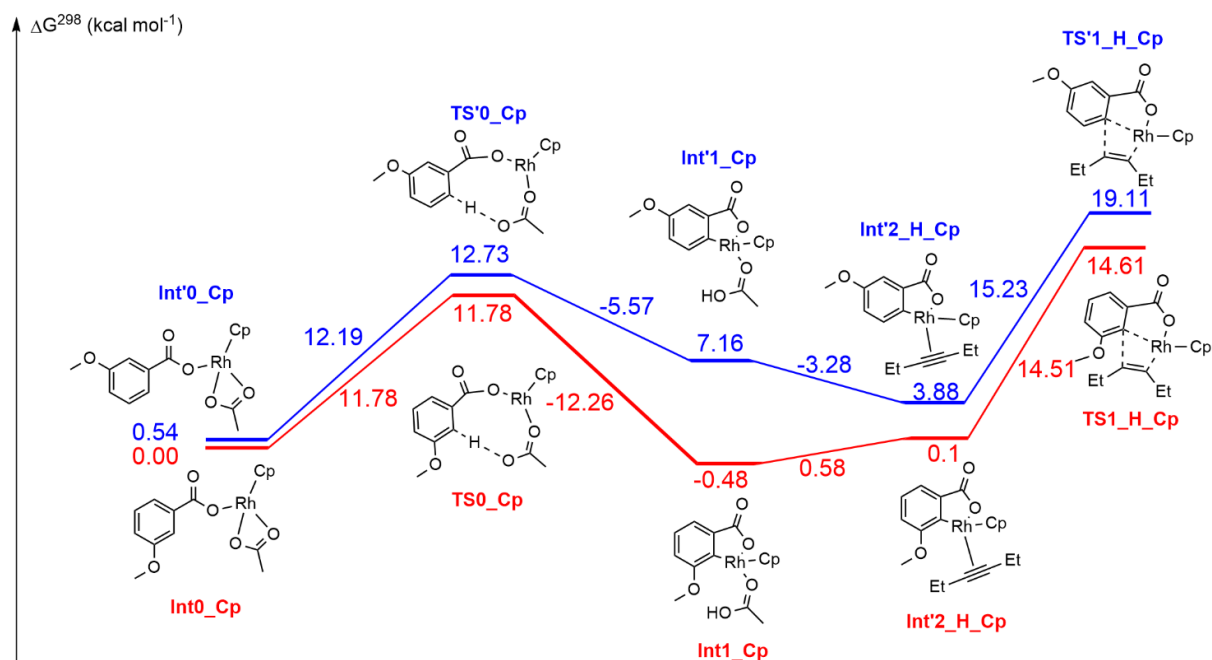

**Figure S5.** Energy profiles of C-H activation and alkyne insertion steps for the annulation of **1a** with diethylacetylene catalyzed by  $[\text{CpRhI}_2]_n$ . The calculated Gibbs free energies are given relative to intermediate **Int0\_Cp** at the M06L(D3)/LANL2DZ level with CPCM correction for methanol solvation (in kcal·mol<sup>-1</sup>, at 298 K).

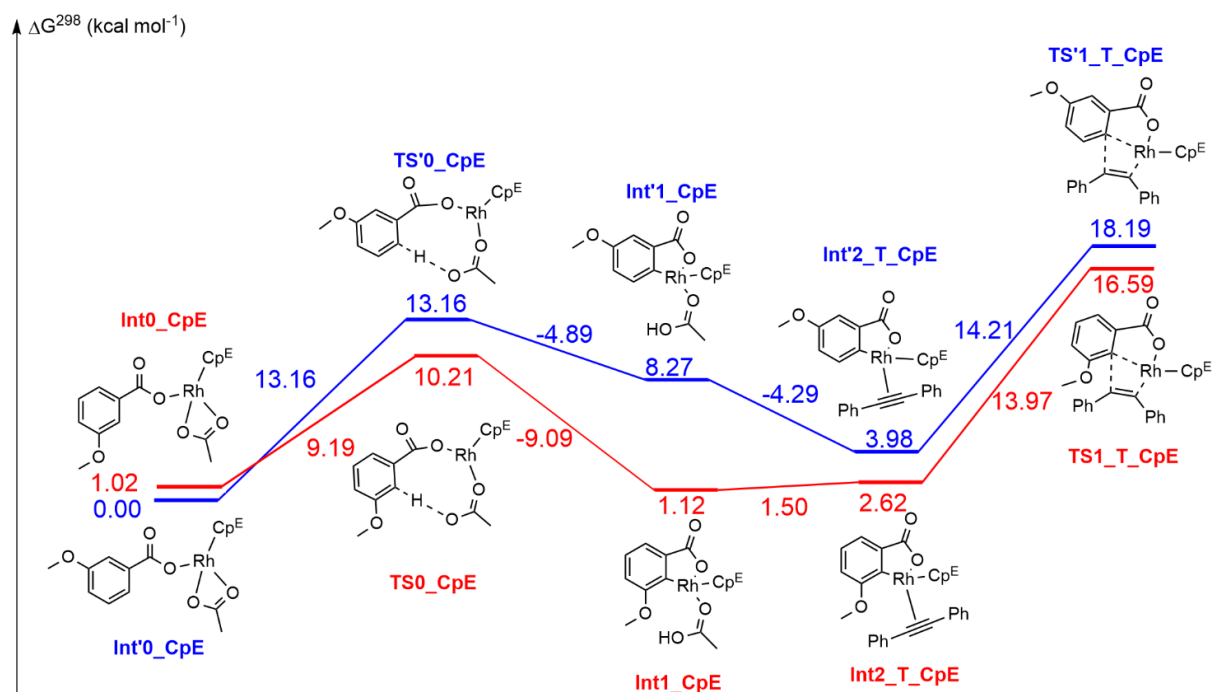

**Figure S6.** Energy profiles of C-H activation and alkyne insertion steps for the annulation of **1a** with diphenylacetylene catalyzed by  $[\text{Cp}^*\text{RhCl}_2]_2$ . The calculated Gibbs free energies are given relative to intermediate **Int'0\_CpE** at the M06L(D3)/LANL2DZ level with CPCM correction for methanol solvation (in kcal·mol<sup>-1</sup>, at 298 K).

### 3. Optimized geometries at the M06L(D3)/LANL2DZ level

**AcOH;** Gibbs free energy ... -228.99874000 Eh

|   |              |             |              |
|---|--------------|-------------|--------------|
| 6 | -2.898171000 | 2.102487000 | -4.780182000 |
| 8 | -3.170532000 | 3.040446000 | -4.006404000 |
| 8 | -2.609631000 | 0.833762000 | -4.310681000 |
| 1 | -2.648719000 | 0.796312000 | -3.328086000 |
| 6 | -2.833797000 | 2.158932000 | -6.272076000 |
| 1 | -1.838258000 | 1.869552000 | -6.611413000 |
| 1 | -3.541980000 | 1.448538000 | -6.700568000 |
| 1 | -3.063245000 | 3.161768000 | -6.620274000 |

**3-Hexyne;** Gibbs free energy ... -234.42175293 Eh

|   |              |              |              |
|---|--------------|--------------|--------------|
| 6 | 0.102298000  | 0.147095000  | -1.317254000 |
| 6 | 0.859854000  | 1.106022000  | -1.203494000 |
| 6 | -0.833148000 | -0.977473000 | -1.461590000 |
| 1 | -0.409645000 | -1.715731000 | -2.150616000 |
| 1 | -0.941367000 | -1.484287000 | -0.496844000 |
| 6 | -2.220218000 | -0.539603000 | -1.968386000 |
| 1 | -2.144529000 | -0.071936000 | -2.952840000 |
| 1 | -2.674331000 | 0.179649000  | -1.282893000 |
| 1 | -2.882047000 | -1.405003000 | -2.047226000 |
| 6 | 1.786389000  | 2.238731000  | -1.068724000 |
| 1 | 1.610491000  | 2.947659000  | -1.884709000 |
| 1 | 1.565259000  | 2.779851000  | -0.142537000 |
| 6 | 3.266014000  | 1.812080000  | -1.071860000 |
| 1 | 3.514633000  | 1.272835000  | -1.988886000 |
| 1 | 3.485994000  | 1.159635000  | -0.223616000 |
| 1 | 3.910292000  | 2.691723000  | -1.005694000 |

**Diphenylacetylene;** Gibbs free energy ... -539.16093857 Eh

|   |              |              |              |
|---|--------------|--------------|--------------|
| 6 | 0.049291000  | -0.066919000 | -2.163337000 |
| 6 | 0.754143000  | 0.538402000  | -1.081822000 |
| 6 | 0.086560000  | 0.843988000  | 0.130516000  |
| 6 | 2.132741000  | 0.845180000  | -1.201416000 |
| 6 | 0.780841000  | 1.441886000  | 1.188544000  |
| 6 | 2.818406000  | 1.442957000  | -0.137652000 |
| 6 | 2.147321000  | 1.744533000  | 1.059953000  |
| 1 | -0.967413000 | 0.611623000  | 0.228709000  |
| 1 | 2.650458000  | 0.612421000  | -2.124563000 |
| 1 | 0.258757000  | 1.673116000  | 2.109226000  |
| 1 | 3.872020000  | 1.673304000  | -0.240790000 |
| 1 | 2.680227000  | 2.211950000  | 1.879193000  |
| 6 | -0.559176000 | -0.588713000 | -3.095526000 |
| 6 | -1.264027000 | -1.194035000 | -4.177041000 |
| 6 | -0.596443000 | -1.499620000 | -5.389379000 |
| 6 | -2.642625000 | -1.500815000 | -4.057448000 |
| 6 | -1.290722000 | -2.097520000 | -6.447406000 |
| 6 | -3.328288000 | -2.098594000 | -5.121212000 |
| 6 | -2.657202000 | -2.400170000 | -6.318815000 |
| 1 | 0.457529000  | -1.267254000 | -5.487572000 |
| 1 | -3.160343000 | -1.268056000 | -3.134300000 |
| 1 | -0.768638000 | -2.328751000 | -7.368088000 |

|   |              |              |              |
|---|--------------|--------------|--------------|
| 1 | -4.381901000 | -2.328943000 | -5.018074000 |
| 1 | -3.190107000 | -2.867588000 | -7.138056000 |

**Int0\_Cp; Gibbs free energy** ... -1065.89797110 Eh

|    |              |              |              |
|----|--------------|--------------|--------------|
| 45 | 1.165220000  | -0.396720000 | -0.244518000 |
| 8  | 2.946564000  | 0.353533000  | 0.814439000  |
| 6  | 2.473979000  | 1.573968000  | 0.850479000  |
| 6  | -1.821382000 | 0.691038000  | 0.371995000  |
| 6  | 3.160295000  | 2.664275000  | 1.595282000  |
| 8  | 1.347348000  | 1.770285000  | 0.212321000  |
| 6  | -1.911883000 | -0.391396000 | 1.258776000  |
| 6  | -2.897676000 | 0.983627000  | -0.481963000 |
| 6  | 2.069314000  | -1.644915000 | -1.813154000 |
| 6  | 1.087756000  | -2.416478000 | -1.068992000 |
| 6  | -0.202700000 | -1.792128000 | -1.272182000 |
| 6  | -0.009058000 | -0.623151000 | -2.087884000 |
| 6  | 1.403946000  | -0.533446000 | -2.431148000 |
| 6  | -3.090636000 | -1.162454000 | 1.316657000  |
| 6  | -4.152740000 | -0.865130000 | 0.455238000  |
| 6  | -4.068305000 | 0.203700000  | -0.452609000 |
| 1  | -3.153562000 | -1.988534000 | 2.014795000  |
| 1  | -4.900927000 | 0.419707000  | -1.110253000 |
| 1  | -5.053202000 | -1.466744000 | 0.479152000  |
| 1  | 2.731541000  | 2.740261000  | 2.597603000  |
| 1  | 4.223102000  | 2.451545000  | 1.692885000  |
| 1  | 3.011652000  | 3.620229000  | 1.095247000  |
| 6  | -0.764477000 | -0.734015000 | 2.155892000  |
| 8  | -0.963507000 | -1.242489000 | 3.300713000  |
| 8  | 0.475731000  | -0.469889000 | 1.735550000  |
| 1  | 1.284560000  | -3.308570000 | -0.499589000 |
| 1  | 3.129695000  | -1.836642000 | -1.832673000 |
| 1  | 1.863589000  | 0.232413000  | -3.031905000 |
| 1  | -0.772220000 | 0.083062000  | -2.373550000 |
| 1  | -1.137317000 | -2.112521000 | -0.839706000 |
| 1  | -0.933013000 | 1.314486000  | 0.341890000  |
| 8  | -2.700635000 | 2.065322000  | -1.338592000 |
| 6  | -3.796113000 | 2.409426000  | -2.246545000 |
| 1  | -4.690478000 | 2.685306000  | -1.681698000 |
| 1  | -3.437697000 | 3.259691000  | -2.818983000 |
| 1  | -4.021965000 | 1.573714000  | -2.914517000 |

**Int'0\_Cp; Gibbs free energy** ... -1065.89711718 Eh

|    |              |              |              |
|----|--------------|--------------|--------------|
| 45 | 1.505884000  | 0.437578000  | -0.175296000 |
| 8  | 3.226389000  | -0.877911000 | -0.580229000 |
| 6  | 3.025996000  | -1.560736000 | 0.518848000  |
| 6  | -1.236002000 | -0.687031000 | 1.239304000  |
| 6  | 3.792297000  | -2.799995000 | 0.823561000  |
| 8  | 2.091888000  | -1.103849000 | 1.314223000  |
| 6  | -1.684098000 | -0.874645000 | -0.079759000 |
| 6  | -2.122997000 | -0.182577000 | 2.205150000  |
| 6  | 2.285884000  | 2.422116000  | -0.720523000 |
| 6  | 1.022533000  | 2.182363000  | -1.394875000 |
| 6  | 0.003777000  | 2.037383000  | -0.374267000 |

|   |              |              |              |
|---|--------------|--------------|--------------|
| 6 | 0.643265000  | 2.143065000  | 0.909988000  |
| 6 | 2.062397000  | 2.386146000  | 0.698072000  |
| 6 | -3.017836000 | -0.585833000 | -0.429407000 |
| 6 | -3.885926000 | -0.068531000 | 0.543269000  |
| 6 | -3.440271000 | 0.138783000  | 1.863410000  |
| 1 | -3.340266000 | -0.761375000 | -1.449199000 |
| 1 | -4.132635000 | 0.538036000  | 2.594384000  |
| 1 | 3.304784000  | -3.648449000 | 0.336792000  |
| 1 | 4.805708000  | -2.726058000 | 0.432185000  |
| 1 | 3.813621000  | -2.985831000 | 1.895588000  |
| 6 | -0.779399000 | -1.416903000 | -1.141823000 |
| 8 | -1.248429000 | -2.099147000 | -2.103585000 |
| 8 | 0.534474000  | -1.200567000 | -1.044061000 |
| 1 | 0.867675000  | 2.149116000  | -2.459628000 |
| 1 | 3.242812000  | 2.535127000  | -1.203389000 |
| 1 | 2.806861000  | 2.516079000  | 1.464412000  |
| 1 | 0.162590000  | 2.021810000  | 1.867167000  |
| 1 | -1.040018000 | 1.827973000  | -0.545939000 |
| 1 | -0.217268000 | -0.948818000 | 1.506384000  |
| 1 | -1.784750000 | -0.039327000 | 3.224302000  |
| 8 | -5.214774000 | 0.270724000  | 0.299319000  |
| 6 | -5.718506000 | 0.073165000  | -1.060082000 |
| 1 | -5.151137000 | 0.678458000  | -1.772271000 |
| 1 | -5.664003000 | -0.981610000 | -1.342681000 |
| 1 | -6.754117000 | 0.399165000  | -1.032178000 |

**TS0\_Cp; Gibbs free energy** ... -1065.87918399 Eh

|    |              |              |              |
|----|--------------|--------------|--------------|
| 45 | -0.682231000 | -0.575605000 | -0.330978000 |
| 8  | -1.982838000 | 1.116543000  | -0.115149000 |
| 6  | -1.552968000 | 2.298752000  | 0.191635000  |
| 6  | 1.170675000  | 0.378560000  | 0.213082000  |
| 6  | -2.529375000 | 3.429701000  | 0.305160000  |
| 8  | -0.287982000 | 2.544152000  | 0.411316000  |
| 6  | 1.977879000  | 0.452751000  | -0.957997000 |
| 6  | 1.828200000  | 0.161997000  | 1.453966000  |
| 6  | -2.307783000 | -2.129031000 | -0.003421000 |
| 6  | -1.504061000 | -2.535099000 | -1.107396000 |
| 6  | -0.129107000 | -2.675208000 | -0.639445000 |
| 6  | -0.122396000 | -2.399720000 | 0.778228000  |
| 6  | -1.453343000 | -2.013397000 | 1.170496000  |
| 6  | 3.371736000  | 0.386667000  | -0.900221000 |
| 6  | 3.989224000  | 0.199632000  | 0.349781000  |
| 6  | 3.233219000  | 0.090630000  | 1.526187000  |
| 1  | 3.956035000  | 0.458666000  | -1.810378000 |
| 1  | 3.734846000  | -0.057281000 | 2.474643000  |
| 1  | 5.068406000  | 0.129491000  | 0.412548000  |
| 1  | -2.415650000 | 3.915607000  | 1.274759000  |
| 1  | -2.316025000 | 4.174902000  | -0.463097000 |
| 1  | -3.547560000 | 3.068648000  | 0.186916000  |
| 1  | 0.380842000  | 1.424627000  | 0.313135000  |
| 6  | 1.227692000  | 0.624976000  | -2.237214000 |
| 8  | 1.770477000  | 0.990786000  | -3.320478000 |
| 8  | -0.087208000 | 0.377705000  | -2.138860000 |

|   |              |              |              |
|---|--------------|--------------|--------------|
| 1 | -1.839877000 | -2.667540000 | -2.122646000 |
| 1 | -3.358162000 | -1.889339000 | -0.037576000 |
| 1 | -1.766705000 | -1.734540000 | 2.162441000  |
| 1 | 0.744127000  | -2.413882000 | 1.419021000  |
| 1 | 0.717212000  | -2.980859000 | -1.232219000 |
| 8 | 0.994924000  | 0.065017000  | 2.554315000  |
| 6 | 1.610354000  | -0.103981000 | 3.876308000  |
| 1 | 2.249107000  | 0.749516000  | 4.114457000  |
| 1 | 0.775852000  | -0.155990000 | 4.568500000  |
| 1 | 2.189796000  | -1.029703000 | 3.909775000  |

**TS'0\_Cp; Gibbs free energy** ... -1065.87769695 Eh

|    |              |              |              |
|----|--------------|--------------|--------------|
| 45 | 1.261582000  | -0.449414000 | 0.086952000  |
| 8  | 2.445475000  | 1.315202000  | -0.241483000 |
| 6  | 1.929090000  | 2.425970000  | -0.656188000 |
| 6  | -0.657739000 | 0.299117000  | -0.564505000 |
| 6  | 2.807276000  | 3.624546000  | -0.844695000 |
| 8  | 0.654185000  | 2.541721000  | -0.929328000 |
| 6  | -1.464557000 | 0.444862000  | 0.601563000  |
| 6  | -1.313990000 | -0.099374000 | -1.761959000 |
| 6  | 2.958471000  | -1.966249000 | 0.282686000  |
| 6  | 1.863908000  | -2.380943000 | 1.096814000  |
| 6  | 0.694578000  | -2.556518000 | 0.250213000  |
| 6  | 1.110016000  | -2.301272000 | -1.116994000 |
| 6  | 2.484943000  | -1.892485000 | -1.093361000 |
| 6  | -2.849714000 | 0.278379000  | 0.583144000  |
| 6  | -3.463037000 | -0.100895000 | -0.626807000 |
| 6  | -2.693330000 | -0.291205000 | -1.797179000 |
| 1  | -3.413018000 | 0.425447000  | 1.498386000  |
| 1  | -3.199878000 | -0.579987000 | -2.709909000 |
| 1  | 2.444142000  | 4.447386000  | -0.227482000 |
| 1  | 3.835181000  | 3.391514000  | -0.579592000 |
| 1  | 2.760895000  | 3.949869000  | -1.885228000 |
| 1  | 0.075973000  | 1.401669000  | -0.767261000 |
| 6  | -0.740521000 | 0.791172000  | 1.859002000  |
| 8  | -1.312304000 | 1.228656000  | 2.899488000  |
| 8  | 0.585633000  | 0.609036000  | 1.789539000  |
| 1  | 1.876074000  | -2.478938000 | 2.170414000  |
| 1  | 3.952619000  | -1.726885000 | 0.621394000  |
| 1  | 3.072730000  | -1.601849000 | -1.948274000 |
| 1  | 0.481532000  | -2.352290000 | -1.990507000 |
| 1  | -0.277873000 | -2.892254000 | 0.570803000  |
| 1  | -0.739136000 | -0.222546000 | -2.673579000 |
| 8  | -4.820600000 | -0.315600000 | -0.767738000 |
| 6  | -5.668865000 | -0.125803000 | 0.415073000  |
| 1  | -5.369952000 | -0.809552000 | 1.212624000  |
| 1  | -5.609168000 | 0.907858000  | 0.763442000  |
| 1  | -6.675916000 | -0.353765000 | 0.080710000  |

**Int1\_Cp; Gibbs free energy** ... -1065.89872987 Eh

|    |             |              |              |
|----|-------------|--------------|--------------|
| 45 | 0.922662000 | -0.509890000 | -0.082410000 |
| 8  | 0.850583000 | 0.397263000  | 1.894102000  |
| 6  | 0.659111000 | 1.627010000  | 2.144327000  |



|   |              |              |              |
|---|--------------|--------------|--------------|
| 6 | -1.070796000 | -0.219615000 | -0.259082000 |
| 6 | 0.810158000  | 2.185981000  | 3.517407000  |
| 8 | 0.310415000  | 2.534028000  | 1.218961000  |
| 6 | -1.877242000 | -1.287523000 | 0.175157000  |
| 6 | -1.704126000 | 0.913564000  | -0.793023000 |
| 6 | 3.152896000  | -0.031746000 | -0.641867000 |
| 6 | 2.873451000  | -1.350161000 | -1.048124000 |
| 6 | 1.713938000  | -1.312161000 | -1.944622000 |
| 6 | 1.363637000  | 0.077310000  | -2.152154000 |
| 6 | 2.189899000  | 0.868100000  | -1.284293000 |
| 6 | -3.276907000 | -1.256264000 | 0.031154000  |
| 6 | -3.877668000 | -0.136275000 | -0.554449000 |
| 6 | -3.096434000 | 0.963741000  | -0.959214000 |
| 1 | -3.865536000 | -2.100962000 | 0.373554000  |
| 1 | -3.576523000 | 1.836016000  | -1.387612000 |
| 1 | -4.951877000 | -0.097375000 | -0.687541000 |
| 1 | -0.163210000 | 2.519950000  | 3.881430000  |
| 1 | 1.212180000  | 1.436168000  | 4.191680000  |
| 1 | 1.462093000  | 3.059321000  | 3.493681000  |
| 1 | 0.062858000  | 2.200588000  | 0.288606000  |
| 6 | -1.153054000 | -2.406292000 | 0.829995000  |
| 8 | -1.718791000 | -3.430125000 | 1.319699000  |
| 8 | 0.176021000  | -2.229034000 | 0.890947000  |
| 1 | 3.376708000  | -2.243388000 | -0.715940000 |
| 1 | 3.907496000  | 0.272015000  | 0.066091000  |
| 1 | 2.171175000  | 1.942439000  | -1.193927000 |
| 1 | 0.571846000  | 0.446714000  | -2.782198000 |
| 1 | 1.278551000  | -2.158206000 | -2.450782000 |
| 8 | -0.844188000 | 1.996283000  | -1.093787000 |
| 6 | -1.445866000 | 3.223471000  | -1.627830000 |
| 1 | -1.919656000 | 3.019077000  | -2.589128000 |
| 1 | -2.176186000 | 3.629417000  | -0.923219000 |
| 1 | -0.618103000 | 3.915784000  | -1.754106000 |

**Int'1\_Cp; Gibbs free energy** ... -1065.88657076 Eh

|    |              |              |              |
|----|--------------|--------------|--------------|
| 45 | 1.356274000  | -0.360966000 | 0.116784000  |
| 8  | 1.033634000  | 1.691374000  | 0.857852000  |
| 6  | 0.789290000  | 2.686745000  | 0.117166000  |
| 6  | -0.606098000 | -0.322928000 | -0.421838000 |
| 6  | 0.495376000  | 4.048930000  | 0.631405000  |
| 8  | 0.770343000  | 2.587638000  | -1.235062000 |
| 6  | -1.493889000 | -0.482056000 | 0.662694000  |
| 6  | -1.149760000 | -0.129848000 | -1.708711000 |
| 6  | 3.679489000  | -0.425323000 | -0.305090000 |
| 6  | 3.308042000  | -1.627122000 | 0.321834000  |
| 6  | 2.244628000  | -2.248559000 | -0.474920000 |
| 6  | 2.056799000  | -1.440765000 | -1.662498000 |
| 6  | 2.875187000  | -0.269471000 | -1.521693000 |
| 6  | -2.889121000 | -0.433050000 | 0.497262000  |
| 6  | -3.407039000 | -0.230103000 | -0.789033000 |
| 6  | -2.538767000 | -0.082678000 | -1.890009000 |
| 1  | -3.522358000 | -0.556420000 | 1.369980000  |
| 1  | -2.965087000 | 0.064368000  | -2.875754000 |

|   |              |              |              |
|---|--------------|--------------|--------------|
| 1 | -0.527723000 | 4.322015000  | 0.366662000  |
| 1 | 0.610997000  | 4.076239000  | 1.710196000  |
| 1 | 1.158654000  | 4.776089000  | 0.163112000  |
| 1 | 0.953317000  | 1.658621000  | -1.536228000 |
| 6 | -0.879939000 | -0.722439000 | 1.990782000  |
| 8 | -1.536760000 | -0.865549000 | 3.066317000  |
| 8 | 0.459574000  | -0.788999000 | 1.964945000  |
| 1 | 3.680165000  | -2.000703000 | 1.261942000  |
| 1 | 4.392088000  | 0.293713000  | 0.065663000  |
| 1 | 2.982407000  | 0.522826000  | -2.245793000 |
| 1 | 1.378850000  | -1.654084000 | -2.472259000 |
| 1 | 1.782241000  | -3.201741000 | -0.277544000 |
| 1 | -0.508094000 | -0.012805000 | -2.577241000 |
| 8 | -4.770511000 | -0.163420000 | -1.083925000 |
| 6 | -5.697955000 | -0.338810000 | 0.033172000  |
| 1 | -5.572726000 | -1.325854000 | 0.486994000  |
| 1 | -5.545950000 | 0.436507000  | 0.789276000  |
| 1 | -6.689582000 | -0.247139000 | -0.400358000 |

**Int2\_T\_Cp:** Gibbs free energy ... -1376.05441992 Eh

|    |              |              |              |
|----|--------------|--------------|--------------|
| 45 | 0.489890000  | -1.079275000 | -0.165103000 |
| 6  | -1.319279000 | -0.787484000 | 0.758668000  |
| 6  | -1.242724000 | -0.524713000 | 2.136195000  |
| 6  | -2.585299000 | -0.780768000 | 0.137279000  |
| 6  | 1.769157000  | -1.826829000 | -1.954688000 |
| 6  | 2.016613000  | -2.693232000 | -0.859048000 |
| 6  | 0.750600000  | -3.299084000 | -0.469978000 |
| 6  | -0.258820000 | -2.835003000 | -1.383353000 |
| 6  | 0.347550000  | -1.876115000 | -2.266120000 |
| 6  | -2.393742000 | -0.256414000 | 2.904261000  |
| 6  | -3.640329000 | -0.251672000 | 2.275136000  |
| 6  | -3.742331000 | -0.515518000 | 0.895736000  |
| 1  | -2.287980000 | -0.056517000 | 3.965372000  |
| 1  | -4.717774000 | -0.504147000 | 0.422323000  |
| 1  | -4.539720000 | -0.039193000 | 2.840761000  |
| 6  | 0.114858000  | -0.539281000 | 2.723988000  |
| 8  | 0.372271000  | -0.318137000 | 3.945900000  |
| 8  | 1.089253000  | -0.818567000 | 1.842335000  |
| 6  | 0.177858000  | 1.166678000  | -0.531714000 |
| 6  | 1.400179000  | 0.902473000  | -0.330993000 |
| 1  | -1.303678000 | -3.093146000 | -1.366356000 |
| 1  | 0.610446000  | -4.021550000 | 0.317576000  |
| 1  | 2.966831000  | -2.854371000 | -0.375922000 |
| 1  | 2.495668000  | -1.195989000 | -2.442537000 |
| 1  | -0.150174000 | -1.341901000 | -3.059013000 |
| 8  | -2.615248000 | -1.038211000 | -1.234436000 |
| 6  | -3.904792000 | -0.944742000 | -1.912637000 |
| 1  | -4.606355000 | -1.687876000 | -1.522490000 |
| 1  | -4.329989000 | 0.058108000  | -1.803023000 |
| 1  | -3.690229000 | -1.147093000 | -2.959007000 |
| 6  | -1.039958000 | 1.923989000  | -0.617434000 |
| 6  | -1.438813000 | 2.697765000  | 0.499791000  |
| 6  | -1.837497000 | 1.926755000  | -1.783207000 |

|   |              |              |              |
|---|--------------|--------------|--------------|
| 6 | -2.606585000 | 3.466959000  | 0.442211000  |
| 6 | -3.003879000 | 2.700208000  | -1.833101000 |
| 6 | -3.392888000 | 3.471146000  | -0.723242000 |
| 1 | -0.829578000 | 2.686879000  | 1.397216000  |
| 1 | -1.543569000 | 1.319255000  | -2.631709000 |
| 1 | -2.903027000 | 4.056581000  | 1.301392000  |
| 1 | -3.610829000 | 2.697267000  | -2.730701000 |
| 1 | -4.297638000 | 4.065692000  | -0.763992000 |
| 6 | 2.807699000  | 1.190195000  | -0.229755000 |
| 6 | 3.720308000  | 0.258049000  | 0.309833000  |
| 6 | 3.282950000  | 2.445867000  | -0.683560000 |
| 6 | 5.081462000  | 0.572258000  | 0.394031000  |
| 6 | 4.645978000  | 2.751062000  | -0.597153000 |
| 6 | 5.549860000  | 1.816893000  | -0.060893000 |
| 1 | 3.343029000  | -0.692335000 | 0.671762000  |
| 1 | 2.583179000  | 3.162027000  | -1.098950000 |
| 1 | 5.775286000  | -0.147559000 | 0.811224000  |
| 1 | 5.004331000  | 3.710377000  | -0.951094000 |
| 1 | 6.604582000  | 2.057031000  | -0.000476000 |

Int'2\_T\_Cp; Gibbs free energy ... -1376.05279225 Eh

|    |              |              |              |
|----|--------------|--------------|--------------|
| 45 | 0.763944000  | -1.005219000 | -0.630609000 |
| 6  | -1.178430000 | -0.952088000 | 0.012419000  |
| 6  | -1.328872000 | -1.047620000 | 1.412097000  |
| 6  | -2.319978000 | -0.766987000 | -0.779711000 |
| 6  | 2.483473000  | -1.339677000 | -2.199052000 |
| 6  | 2.321710000  | -2.535775000 | -1.461482000 |
| 6  | 0.948918000  | -2.999397000 | -1.629619000 |
| 6  | 0.291519000  | -2.092813000 | -2.537516000 |
| 6  | 1.212153000  | -1.032219000 | -2.840626000 |
| 6  | -2.585988000 | -0.926580000 | 2.021244000  |
| 6  | -3.714790000 | -0.711918000 | 1.218570000  |
| 6  | -3.588584000 | -0.649669000 | -0.183608000 |
| 1  | -2.677977000 | -0.989802000 | 3.100850000  |
| 1  | -4.456144000 | -0.492357000 | -0.814347000 |
| 6  | -0.092936000 | -1.283871000 | 2.188770000  |
| 8  | -0.041734000 | -1.409359000 | 3.449216000  |
| 8  | 1.011496000  | -1.375649000 | 1.428722000  |
| 6  | 0.439427000  | 1.277226000  | -0.428665000 |
| 6  | 1.575130000  | 0.938822000  | 0.012450000  |
| 1  | -0.722761000 | -2.172430000 | -2.892148000 |
| 1  | 0.535968000  | -3.908977000 | -1.225029000 |
| 1  | 3.064062000  | -3.002350000 | -0.832940000 |
| 1  | 3.371381000  | -0.728938000 | -2.240309000 |
| 1  | 1.016220000  | -0.187539000 | -3.481573000 |
| 6  | -0.767700000 | 1.984431000  | -0.742723000 |
| 6  | -1.627090000 | 2.388525000  | 0.306671000  |
| 6  | -1.128712000 | 2.260482000  | -2.081026000 |
| 6  | -2.820938000 | 3.058514000  | 0.018040000  |
| 6  | -2.321555000 | 2.937961000  | -2.360392000 |
| 6  | -3.172805000 | 3.335475000  | -1.314456000 |
| 1  | -1.357334000 | 2.160097000  | 1.332092000  |
| 1  | -0.477401000 | 1.941897000  | -2.887254000 |

|   |              |              |              |
|---|--------------|--------------|--------------|
| 1 | -3.475485000 | 3.357965000  | 0.828185000  |
| 1 | -2.588029000 | 3.152309000  | -3.388323000 |
| 1 | -4.098397000 | 3.853255000  | -1.535447000 |
| 6 | 2.873435000  | 1.169386000  | 0.591297000  |
| 6 | 3.797967000  | 0.124951000  | 0.806375000  |
| 6 | 3.228557000  | 2.494210000  | 0.948878000  |
| 6 | 5.054026000  | 0.398137000  | 1.360643000  |
| 6 | 4.486041000  | 2.758862000  | 1.502118000  |
| 6 | 5.403678000  | 1.713815000  | 1.708713000  |
| 1 | 3.514827000  | -0.890425000 | 0.548003000  |
| 1 | 2.517433000  | 3.296581000  | 0.788799000  |
| 1 | 5.758461000  | -0.409031000 | 1.521301000  |
| 1 | 4.750103000  | 3.775183000  | 1.769206000  |
| 1 | 6.376764000  | 1.920337000  | 2.137857000  |
| 1 | -2.244433000 | -0.673110000 | -1.858019000 |
| 8 | -4.929014000 | -0.566828000 | 1.897191000  |
| 6 | -6.105357000 | -0.238414000 | 1.093729000  |
| 1 | -5.944403000 | 0.690427000  | 0.536856000  |
| 1 | -6.341618000 | -1.048964000 | 0.398696000  |
| 1 | -6.912585000 | -0.110768000 | 1.809134000  |

**Int2\_H\_Cp; Gibbs free energy** ... -1071.32081084 Eh

|    |              |              |              |
|----|--------------|--------------|--------------|
| 45 | -0.634039000 | -0.555049000 | -0.466695000 |
| 6  | 1.220250000  | 0.288368000  | -0.477008000 |
| 6  | 1.326984000  | 1.488867000  | -1.200238000 |
| 6  | 2.367166000  | -0.208930000 | 0.175786000  |
| 6  | -2.046864000 | -2.367059000 | -0.091341000 |
| 6  | -2.076135000 | -2.081920000 | -1.478449000 |
| 6  | -0.716757000 | -2.210037000 | -1.991715000 |
| 6  | 0.127481000  | -2.634634000 | -0.907806000 |
| 6  | -0.671163000 | -2.667234000 | 0.287071000  |
| 6  | 2.544554000  | 2.193881000  | -1.291777000 |
| 6  | 3.671541000  | 1.684780000  | -0.643221000 |
| 6  | 3.588772000  | 0.486169000  | 0.092011000  |
| 1  | 2.579977000  | 3.116636000  | -1.861258000 |
| 1  | 4.472084000  | 0.108201000  | 0.594465000  |
| 1  | 4.619034000  | 2.207794000  | -0.695927000 |
| 6  | 0.084392000  | 1.965062000  | -1.848935000 |
| 8  | -0.008384000 | 3.034414000  | -2.526094000 |
| 8  | -0.970403000 | 1.155848000  | -1.662824000 |
| 6  | -0.696545000 | 0.515402000  | 1.554680000  |
| 6  | -1.795631000 | 0.715174000  | 0.973596000  |
| 6  | -3.151798000 | 1.160247000  | 0.609462000  |
| 1  | -3.122852000 | 1.582048000  | -0.400037000 |
| 1  | -3.816331000 | 0.289926000  | 0.567526000  |
| 6  | 0.329530000  | 0.531601000  | 2.615841000  |
| 1  | 1.233292000  | 1.029375000  | 2.247188000  |
| 1  | 0.623760000  | -0.497015000 | 2.847962000  |
| 1  | 1.187375000  | -2.817726000 | -0.958473000 |
| 1  | -0.413526000 | -2.074170000 | -3.017351000 |
| 1  | -2.939578000 | -1.788144000 | -2.053300000 |
| 1  | -2.884117000 | -2.315923000 | 0.586686000  |
| 1  | -0.325787000 | -2.933207000 | 1.272840000  |

|   |              |              |             |
|---|--------------|--------------|-------------|
| 6 | -3.699181000 | 2.196825000  | 1.607569000 |
| 1 | -3.742792000 | 1.783470000  | 2.618183000 |
| 1 | -3.069946000 | 3.089442000  | 1.627677000 |
| 1 | -4.708586000 | 2.492378000  | 1.313942000 |
| 6 | -0.189344000 | 1.242089000  | 3.877994000 |
| 1 | -1.090274000 | 0.754537000  | 4.258658000 |
| 1 | 0.574034000  | 1.213936000  | 4.658436000 |
| 1 | -0.429122000 | 2.287134000  | 3.666977000 |
| 8 | 2.208675000  | -1.392740000 | 0.903995000 |
| 6 | 3.318968000  | -1.807346000 | 1.757938000 |
| 1 | 4.200968000  | -2.060835000 | 1.163155000 |
| 1 | 3.568560000  | -1.016844000 | 2.473306000 |
| 1 | 2.961255000  | -2.688376000 | 2.284564000 |

**Int'2\_H\_Cp; Gibbs free energy** ... -1071.31481578 Eh

|    |              |              |              |
|----|--------------|--------------|--------------|
| 45 | 1.052066000  | -0.663352000 | 0.038155000  |
| 6  | -0.971584000 | -0.421128000 | -0.065552000 |
| 6  | -1.562072000 | 0.074064000  | 1.118937000  |
| 6  | -1.801359000 | -0.694131000 | -1.163424000 |
| 6  | 3.130537000  | -1.591396000 | -0.568482000 |
| 6  | 2.627371000  | -2.326175000 | 0.529307000  |
| 6  | 1.330515000  | -2.882055000 | 0.157751000  |
| 6  | 1.077969000  | -2.518196000 | -1.214418000 |
| 6  | 2.150727000  | -1.663898000 | -1.645232000 |
| 6  | -2.941272000 | 0.302936000  | 1.211651000  |
| 6  | -3.757200000 | 0.022019000  | 0.106316000  |
| 6  | -3.190220000 | -0.480863000 | -1.082063000 |
| 1  | -3.367805000 | 0.686986000  | 2.132825000  |
| 1  | -3.808811000 | -0.707653000 | -1.942625000 |
| 6  | -0.647283000 | 0.316146000  | 2.256726000  |
| 8  | -1.002665000 | 0.780534000  | 3.382344000  |
| 8  | 0.627282000  | -0.017672000 | 2.001714000  |
| 6  | 0.981425000  | 1.402909000  | -0.928739000 |
| 6  | 1.865412000  | 1.442659000  | -0.034625000 |
| 6  | 2.917838000  | 1.851553000  | 0.910949000  |
| 1  | 2.613027000  | 1.561678000  | 1.921449000  |
| 1  | 3.836227000  | 1.296844000  | 0.689197000  |
| 6  | 0.138572000  | 1.815300000  | -2.067282000 |
| 1  | -0.911667000 | 1.830278000  | -1.757539000 |
| 1  | 0.211736000  | 1.062305000  | -2.860229000 |
| 1  | 0.216110000  | -2.797652000 | -1.797517000 |
| 1  | 0.718388000  | -3.523804000 | 0.770117000  |
| 1  | 3.091153000  | -2.425650000 | 1.497793000  |
| 1  | 4.047557000  | -1.025021000 | -0.593510000 |
| 1  | 2.249548000  | -1.209370000 | -2.618347000 |
| 6  | 3.187736000  | 3.365983000  | 0.847544000  |
| 1  | 3.508289000  | 3.665941000  | -0.153148000 |
| 1  | 2.291644000  | 3.934626000  | 1.105915000  |
| 1  | 3.978104000  | 3.627010000  | 1.554389000  |
| 6  | 0.556386000  | 3.196729000  | -2.599406000 |
| 1  | 1.602884000  | 3.195139000  | -2.913997000 |
| 1  | -0.061563000 | 3.467394000  | -3.458069000 |
| 1  | 0.431822000  | 3.963184000  | -1.830635000 |

|   |              |              |              |
|---|--------------|--------------|--------------|
| 1 | -1.388363000 | -1.057171000 | -2.098886000 |
| 8 | -5.122744000 | 0.271938000  | 0.276636000  |
| 6 | -5.999291000 | -0.001257000 | -0.860363000 |
| 1 | -5.714709000 | 0.604354000  | -1.725480000 |
| 1 | -5.971844000 | -1.061722000 | -1.127064000 |
| 1 | -6.995757000 | 0.273110000  | -0.525846000 |

TS2\_T\_Cp; Gibbs free energy ... -1376.03674349 Eh

|    |              |              |              |
|----|--------------|--------------|--------------|
| 45 | 0.440218000  | -1.237495000 | -0.496642000 |
| 6  | -1.233333000 | -0.744583000 | 0.665878000  |
| 6  | -1.131660000 | -1.184251000 | 2.008734000  |
| 6  | -2.529815000 | -0.526819000 | 0.130150000  |
| 6  | 1.491335000  | -1.328521000 | -2.535092000 |
| 6  | 1.721078000  | -2.554423000 | -1.845811000 |
| 6  | 0.428346000  | -3.213299000 | -1.647051000 |
| 6  | -0.579697000 | -2.379815000 | -2.204458000 |
| 6  | 0.060034000  | -1.175438000 | -2.697547000 |
| 6  | -2.265137000 | -1.291912000 | 2.829340000  |
| 6  | -3.529717000 | -1.015487000 | 2.294603000  |
| 6  | -3.667564000 | -0.653258000 | 0.942363000  |
| 1  | -2.141660000 | -1.618115000 | 3.856456000  |
| 1  | -4.654883000 | -0.475272000 | 0.532606000  |
| 6  | 0.211303000  | -1.616366000 | 2.462752000  |
| 8  | 0.512270000  | -1.841791000 | 3.674863000  |
| 8  | 1.090437000  | -1.795936000 | 1.467819000  |
| 6  | -0.066014000 | 0.818700000  | 0.248126000  |
| 6  | 1.212867000  | 0.540636000  | 0.208300000  |
| 1  | -1.641586000 | -2.561450000 | -2.197095000 |
| 1  | 0.280954000  | -4.172791000 | -1.178602000 |
| 1  | 2.677864000  | -2.946802000 | -1.539626000 |
| 1  | 2.238635000  | -0.602908000 | -2.815010000 |
| 1  | -0.443181000 | -0.344988000 | -3.166736000 |
| 1  | -4.414823000 | -1.095302000 | 2.913799000  |
| 8  | -2.575518000 | -0.181638000 | -1.213967000 |
| 6  | -3.841777000 | 0.334605000  | -1.737397000 |
| 1  | -4.615984000 | -0.436426000 | -1.711095000 |
| 1  | -4.161574000 | 1.208524000  | -1.161078000 |
| 1  | -3.629133000 | 0.615974000  | -2.765397000 |
| 6  | -0.922459000 | 1.966865000  | -0.054191000 |
| 6  | -0.634862000 | 2.727589000  | -1.209714000 |
| 6  | -1.966035000 | 2.373721000  | 0.801931000  |
| 6  | -1.388034000 | 3.869795000  | -1.507970000 |
| 6  | -2.713186000 | 3.521445000  | 0.502770000  |
| 6  | -2.431414000 | 4.267717000  | -0.654609000 |
| 1  | 0.171424000  | 2.410275000  | -1.863880000 |
| 1  | -2.178581000 | 1.800125000  | 1.698301000  |
| 1  | -1.163433000 | 4.445238000  | -2.397995000 |
| 1  | -3.510058000 | 3.831874000  | 1.168047000  |
| 1  | -3.017132000 | 5.148680000  | -0.888515000 |
| 6  | 2.551164000  | 1.029936000  | 0.374827000  |
| 6  | 3.670457000  | 0.262248000  | -0.025488000 |
| 6  | 2.764649000  | 2.320470000  | 0.929526000  |
| 6  | 4.965809000  | 0.775430000  | 0.102830000  |

|   |             |              |              |
|---|-------------|--------------|--------------|
| 6 | 4.062640000 | 2.824893000  | 1.055176000  |
| 6 | 5.167628000 | 2.058496000  | 0.640449000  |
| 1 | 3.506466000 | -0.732233000 | -0.429787000 |
| 1 | 1.912535000 | 2.911927000  | 1.246518000  |
| 1 | 5.815316000 | 0.179072000  | -0.207724000 |
| 1 | 4.214833000 | 3.811864000  | 1.475769000  |
| 1 | 6.170413000 | 2.455810000  | 0.741813000  |

TS'2\_T\_Cp; Gibbs free energy ... -1376.03040921 Eh

|    |              |              |              |
|----|--------------|--------------|--------------|
| 45 | 0.567690000  | -1.148211000 | -0.682982000 |
| 6  | -1.258912000 | -0.424381000 | 0.068529000  |
| 6  | -1.562795000 | -0.975248000 | 1.341853000  |
| 6  | -2.325302000 | 0.019726000  | -0.741004000 |
| 6  | 2.038395000  | -1.314508000 | -2.432951000 |
| 6  | 1.948869000  | -2.586279000 | -1.796296000 |
| 6  | 0.574363000  | -3.069341000 | -1.942845000 |
| 6  | -0.164223000 | -2.090733000 | -2.659284000 |
| 6  | 0.714403000  | -0.964224000 | -2.907994000 |
| 6  | -2.874665000 | -1.006797000 | 1.820866000  |
| 6  | -3.920844000 | -0.547595000 | 1.003657000  |
| 6  | -3.648113000 | -0.053181000 | -0.289538000 |
| 1  | -3.083875000 | -1.428549000 | 2.798145000  |
| 1  | -4.449263000 | 0.280674000  | -0.937718000 |
| 6  | -0.456181000 | -1.631421000 | 2.079864000  |
| 8  | -0.515948000 | -1.961614000 | 3.302979000  |
| 8  | 0.615517000  | -1.893528000 | 1.322265000  |
| 6  | 0.229801000  | 0.936987000  | 0.064564000  |
| 6  | 1.412038000  | 0.439416000  | 0.328142000  |
| 1  | -1.211754000 | -2.136018000 | -2.909423000 |
| 1  | 0.200379000  | -4.011676000 | -1.576470000 |
| 1  | 2.752968000  | -3.117927000 | -1.312987000 |
| 1  | 2.913387000  | -0.685669000 | -2.483205000 |
| 1  | 0.448226000  | -0.059231000 | -3.431654000 |
| 6  | -0.329740000 | 2.210129000  | -0.389704000 |
| 6  | 0.331799000  | 2.903868000  | -1.428999000 |
| 6  | -1.468680000 | 2.785091000  | 0.212192000  |
| 6  | -0.148184000 | 4.145622000  | -1.865145000 |
| 6  | -1.937631000 | 4.032301000  | -0.219515000 |
| 6  | -1.284445000 | 4.711623000  | -1.263388000 |
| 1  | 1.207592000  | 2.456779000  | -1.889482000 |
| 1  | -1.972101000 | 2.258226000  | 1.015867000  |
| 1  | 0.358533000  | 4.666346000  | -2.668739000 |
| 1  | -2.807599000 | 4.472476000  | 0.252789000  |
| 1  | -1.657919000 | 5.669823000  | -1.604397000 |
| 6  | 2.717277000  | 0.646053000  | 0.883501000  |
| 6  | 3.743368000  | -0.313284000 | 0.711254000  |
| 6  | 3.000625000  | 1.834627000  | 1.607906000  |
| 6  | 5.021297000  | -0.088666000 | 1.233601000  |
| 6  | 4.280419000  | 2.049148000  | 2.129897000  |
| 6  | 5.295635000  | 1.092178000  | 1.944677000  |
| 1  | 3.515737000  | -1.229620000 | 0.174655000  |
| 1  | 2.219059000  | 2.573231000  | 1.749559000  |
| 1  | 5.797269000  | -0.831737000 | 1.094713000  |

|   |              |              |              |
|---|--------------|--------------|--------------|
| 1 | 4.490147000  | 2.958656000  | 2.680420000  |
| 1 | 6.283304000  | 1.262187000  | 2.356184000  |
| 1 | -2.124978000 | 0.438751000  | -1.722178000 |
| 8 | -5.198129000 | -0.641709000 | 1.547308000  |
| 6 | -6.324695000 | -0.236910000 | 0.704591000  |
| 1 | -6.258221000 | 0.824714000  | 0.453021000  |
| 1 | -6.355184000 | -0.835879000 | -0.209221000 |
| 1 | -7.209430000 | -0.426850000 | 1.305067000  |

**TS2\_H\_Cp**; Gibbs free energy ... -1071.29767934 Eh

|    |              |              |              |
|----|--------------|--------------|--------------|
| 45 | -0.846872000 | -0.359409000 | -0.302276000 |
| 6  | 1.148520000  | 0.293010000  | -0.313718000 |
| 6  | 1.385955000  | 1.354114000  | -1.220224000 |
| 6  | 2.246253000  | -0.525847000 | 0.059580000  |
| 6  | -2.441811000 | -1.871618000 | 0.330276000  |
| 6  | -2.616236000 | -1.567231000 | -1.051410000 |
| 6  | -1.423244000 | -2.019438000 | -1.772685000 |
| 6  | -0.521927000 | -2.569565000 | -0.823088000 |
| 6  | -1.115429000 | -2.427128000 | 0.495254000  |
| 6  | 2.680492000  | 1.656382000  | -1.671535000 |
| 6  | 3.755089000  | 0.862381000  | -1.253291000 |
| 6  | 3.539920000  | -0.239009000 | -0.403170000 |
| 1  | 2.820098000  | 2.482213000  | -2.360621000 |
| 1  | 4.380455000  | -0.859035000 | -0.114396000 |
| 6  | 0.185531000  | 2.061261000  | -1.727530000 |
| 8  | 0.231499000  | 3.159077000  | -2.367145000 |
| 8  | -0.965729000 | 1.423458000  | -1.490309000 |
| 6  | 0.199429000  | 0.940750000  | 1.292080000  |
| 6  | -1.090783000 | 1.047561000  | 1.202094000  |
| 6  | -2.334836000 | 1.600305000  | 1.794325000  |
| 1  | -2.733021000 | 0.859871000  | 2.499449000  |
| 1  | -2.070121000 | 2.485410000  | 2.384634000  |
| 6  | 1.321768000  | 1.177217000  | 2.258099000  |
| 1  | 2.133126000  | 1.714956000  | 1.753766000  |
| 1  | 1.734795000  | 0.212764000  | 2.572636000  |
| 1  | 0.463846000  | -2.957795000 | -1.020055000 |
| 1  | -1.270976000 | -1.947327000 | -2.837286000 |
| 1  | -3.484899000 | -1.113333000 | -1.501154000 |
| 1  | -3.142406000 | -1.661706000 | 1.122512000  |
| 1  | -0.668596000 | -2.747883000 | 1.422307000  |
| 6  | 0.824768000  | 1.967635000  | 3.475109000  |
| 1  | 0.028437000  | 1.429872000  | 3.996778000  |
| 1  | 1.646889000  | 2.127445000  | 4.175950000  |
| 1  | 0.435218000  | 2.943814000  | 3.175009000  |
| 6  | -3.423762000 | 1.956327000  | 0.773586000  |
| 1  | -3.083030000 | 2.738349000  | 0.091768000  |
| 1  | -3.687513000 | 1.080475000  | 0.172585000  |
| 1  | -4.321652000 | 2.307195000  | 1.287467000  |
| 1  | 4.760376000  | 1.077347000  | -1.594754000 |
| 8  | 1.943594000  | -1.592080000 | 0.902304000  |
| 6  | 3.062646000  | -2.385928000 | 1.411665000  |
| 1  | 3.582607000  | -2.890593000 | 0.593211000  |
| 1  | 3.763223000  | -1.752843000 | 1.964480000  |



|   |             |              |             |
|---|-------------|--------------|-------------|
| 1 | 2.613855000 | -3.117531000 | 2.077577000 |
|---|-------------|--------------|-------------|

**TS'2\_H\_Cp; Gibbs free energy** ... -1071.29054845 Eh

|    |              |              |              |
|----|--------------|--------------|--------------|
| 45 | 1.165314000  | -0.702356000 | 0.034072000  |
| 6  | -0.824987000 | -0.032080000 | -0.185041000 |
| 6  | -1.436271000 | 0.211179000  | 1.076089000  |
| 6  | -1.659682000 | -0.373347000 | -1.271735000 |
| 6  | 2.974079000  | -1.559672000 | -1.058750000 |
| 6  | 2.951088000  | -2.098413000 | 0.260506000  |
| 6  | 1.732065000  | -2.900789000 | 0.391407000  |
| 6  | 1.023642000  | -2.848437000 | -0.837286000 |
| 6  | 1.746905000  | -1.955345000 | -1.722578000 |
| 6  | -2.824811000 | 0.196978000  | 1.223439000  |
| 6  | -3.636085000 | -0.117783000 | 0.120357000  |
| 6  | -3.051054000 | -0.428992000 | -1.124895000 |
| 1  | -1.223606000 | -0.584490000 | -2.242849000 |
| 1  | -3.269750000 | 0.388640000  | 2.194125000  |
| 1  | -3.663065000 | -0.703781000 | -1.975463000 |
| 6  | -0.535773000 | 0.371313000  | 2.244343000  |
| 8  | -0.911894000 | 0.823784000  | 3.369920000  |
| 8  | 0.716765000  | -0.040851000 | 2.023006000  |
| 6  | 0.456081000  | 1.350472000  | -0.691277000 |
| 6  | 1.605425000  | 1.314595000  | -0.079605000 |
| 6  | 2.828228000  | 1.958181000  | 0.453025000  |
| 1  | 3.032968000  | 1.532094000  | 1.442025000  |
| 1  | 3.679125000  | 1.673007000  | -0.177801000 |
| 6  | -0.264525000 | 2.122696000  | -1.758663000 |
| 1  | -1.297319000 | 2.308246000  | -1.443286000 |
| 1  | -0.326495000 | 1.494677000  | -2.654780000 |
| 1  | 0.075215000  | -3.315466000 | -1.047683000 |
| 1  | 1.436918000  | -3.446134000 | 1.273654000  |
| 1  | 3.707701000  | -1.973635000 | 1.017818000  |
| 1  | 3.730146000  | -0.912303000 | -1.472938000 |
| 1  | 1.468179000  | -1.702494000 | -2.733609000 |
| 8  | -5.008219000 | -0.117485000 | 0.358944000  |
| 6  | -5.889917000 | -0.431530000 | -0.766327000 |
| 1  | -5.753256000 | 0.291671000  | -1.574684000 |
| 1  | -5.702065000 | -1.443105000 | -1.135261000 |
| 1  | -6.896768000 | -0.358877000 | -0.365940000 |
| 6  | 0.443951000  | 3.438488000  | -2.093100000 |
| 1  | 1.473405000  | 3.260827000  | -2.417096000 |
| 1  | -0.086469000 | 3.950353000  | -2.899174000 |
| 1  | 0.468095000  | 4.101902000  | -1.225325000 |
| 6  | 2.738251000  | 3.488854000  | 0.562527000  |
| 1  | 2.639602000  | 3.952715000  | -0.420831000 |
| 1  | 1.877957000  | 3.785615000  | 1.168480000  |
| 1  | 3.643566000  | 3.877232000  | 1.034650000  |

**Int0\_Cp\*; Gibbs free energy** ... -1262.33163222 Eh

|    |              |             |              |
|----|--------------|-------------|--------------|
| 45 | -0.998817000 | 0.039006000 | -0.178649000 |
| 8  | -2.145149000 | 1.407620000 | -1.538487000 |
| 6  | -1.315138000 | 2.398908000 | -1.343763000 |
| 6  | 2.311407000  | 0.422772000 | -0.413424000 |

|   |              |              |              |
|---|--------------|--------------|--------------|
| 6 | -1.442168000 | 3.680264000  | -2.101040000 |
| 8 | -0.356376000 | 2.210857000  | -0.475093000 |
| 6 | 2.290981000  | -0.762123000 | -1.160777000 |
| 6 | 3.361503000  | 0.660625000  | 0.488347000  |
| 6 | -2.112454000 | -1.703817000 | 0.444983000  |
| 6 | -0.724518000 | -1.905552000 | 0.832072000  |
| 6 | -0.346520000 | -0.834010000 | 1.729571000  |
| 6 | -1.525402000 | 0.017596000  | 1.941207000  |
| 6 | -2.615752000 | -0.530954000 | 1.170912000  |
| 6 | 3.334196000  | -1.702362000 | -1.022018000 |
| 6 | 4.369503000  | -1.457800000 | -0.114095000 |
| 6 | 4.395383000  | -0.277603000 | 0.650789000  |
| 1 | 5.202472000  | -0.107348000 | 1.352630000  |
| 1 | -1.146703000 | 4.524020000  | -1.478690000 |
| 1 | -0.777089000 | 3.654599000  | -2.967990000 |
| 1 | -2.461345000 | 3.816610000  | -2.458477000 |
| 6 | 1.178953000  | -1.028830000 | -2.131578000 |
| 8 | 1.345429000  | -1.858561000 | -3.082219000 |
| 8 | 0.042882000  | -0.353684000 | -1.988715000 |
| 1 | 3.311578000  | -2.608472000 | -1.615870000 |
| 6 | -1.572695000 | 1.216791000  | 2.821204000  |
| 1 | -1.762367000 | 0.913281000  | 3.856272000  |
| 1 | -0.625235000 | 1.759578000  | 2.804017000  |
| 1 | -2.369282000 | 1.900170000  | 2.521716000  |
| 6 | 0.144751000  | -3.017159000 | 0.362003000  |
| 1 | -0.052693000 | -3.912561000 | 0.960582000  |
| 1 | -0.058120000 | -3.270158000 | -0.681905000 |
| 1 | 1.204313000  | -2.772474000 | 0.460987000  |
| 6 | -2.903864000 | -2.580659000 | -0.459231000 |
| 1 | -2.266752000 | -3.047612000 | -1.213231000 |
| 1 | -3.382067000 | -3.380411000 | 0.116534000  |
| 1 | -3.691806000 | -2.022797000 | -0.969125000 |
| 1 | 1.526165000  | 1.163548000  | -0.524304000 |
| 6 | 0.963464000  | -0.663453000 | 2.412004000  |
| 1 | 1.261558000  | 0.387969000  | 2.454383000  |
| 1 | 0.888654000  | -1.027523000 | 3.442774000  |
| 1 | 1.756345000  | -1.223207000 | 1.911567000  |
| 6 | -4.004351000 | -0.004527000 | 1.100522000  |
| 1 | -4.635247000 | -0.538594000 | 1.818971000  |
| 1 | -4.044272000 | 1.058298000  | 1.344513000  |
| 1 | -4.438690000 | -0.149411000 | 0.109503000  |
| 1 | 5.163189000  | -2.184797000 | 0.010204000  |
| 8 | 3.273625000  | 1.860198000  | 1.195218000  |
| 6 | 4.317586000  | 2.139007000  | 2.180914000  |
| 1 | 4.040941000  | 3.089692000  | 2.627315000  |
| 1 | 4.345671000  | 1.357544000  | 2.946177000  |
| 1 | 5.295261000  | 2.219806000  | 1.697974000  |

Int'0\_Cp\*; Gibbs free energy ... -1262.33102960 Eh

|    |              |             |              |
|----|--------------|-------------|--------------|
| 45 | -1.272891000 | 0.061729000 | -0.109135000 |
| 8  | -2.800038000 | 1.566698000 | -0.805534000 |
| 6  | -2.365850000 | 2.469960000 | 0.033397000  |
| 6  | 1.717025000  | 1.562323000 | 0.572558000  |

|   |              |              |              |
|---|--------------|--------------|--------------|
| 6 | -2.903873000 | 3.863769000  | 0.024650000  |
| 8 | -1.421706000 | 2.107274000  | 0.862435000  |
| 6 | 2.087284000  | 0.867407000  | -0.591560000 |
| 6 | 2.612488000  | 1.625229000  | 1.653745000  |
| 6 | -1.843855000 | -1.950304000 | -0.669457000 |
| 6 | -0.439131000 | -1.972103000 | -0.303086000 |
| 6 | -0.323943000 | -1.526032000 | 1.071965000  |
| 6 | -1.678700000 | -1.269796000 | 1.578516000  |
| 6 | -2.613960000 | -1.541561000 | 0.513809000  |
| 6 | 3.342691000  | 0.232026000  | -0.673723000 |
| 6 | 4.211156000  | 0.276322000  | 0.426763000  |
| 6 | 3.851660000  | 0.981447000  | 1.593328000  |
| 1 | 4.544177000  | 1.012326000  | 2.425738000  |
| 1 | -2.775643000 | 4.330600000  | 0.999771000  |
| 1 | -2.356512000 | 4.455464000  | -0.713516000 |
| 1 | -3.955831000 | 3.865575000  | -0.257909000 |
| 6 | 1.188501000  | 0.836233000  | -1.793174000 |
| 8 | 1.681534000  | 0.668749000  | -2.953911000 |
| 8 | -0.114158000 | 1.027128000  | -1.606446000 |
| 1 | 3.605701000  | -0.284455000 | -1.589914000 |
| 6 | -2.004768000 | -0.819365000 | 2.957980000  |
| 1 | -2.016467000 | -1.680664000 | 3.634223000  |
| 1 | -1.258348000 | -0.115448000 | 3.333114000  |
| 1 | -2.984969000 | -0.342138000 | 3.004233000  |
| 6 | 0.685989000  | -2.363056000 | -1.193318000 |
| 1 | 0.838811000  | -3.445809000 | -1.137361000 |
| 1 | 0.480045000  | -2.110567000 | -2.235767000 |
| 1 | 1.620888000  | -1.880802000 | -0.894733000 |
| 6 | -2.415745000 | -2.344540000 | -1.984615000 |
| 1 | -1.692662000 | -2.206735000 | -2.790386000 |
| 1 | -2.698344000 | -3.402752000 | -1.965546000 |
| 1 | -3.312425000 | -1.768013000 | -2.221634000 |
| 1 | 0.749646000  | 2.049795000  | 0.626856000  |
| 1 | 2.338832000  | 2.172910000  | 2.547569000  |
| 8 | 5.460254000  | -0.341918000 | 0.456744000  |
| 6 | 5.854214000  | -1.105680000 | -0.727350000 |
| 1 | 5.142221000  | -1.914511000 | -0.915057000 |
| 1 | 5.914426000  | -0.456056000 | -1.604857000 |
| 1 | 6.833648000  | -1.512795000 | -0.494721000 |
| 6 | 0.925953000  | -1.463807000 | 1.875272000  |
| 1 | 0.866869000  | -0.696698000 | 2.649822000  |
| 1 | 1.090526000  | -2.428318000 | 2.368838000  |
| 1 | 1.798657000  | -1.253441000 | 1.250322000  |
| 6 | -4.095693000 | -1.427926000 | 0.573796000  |
| 1 | -4.536575000 | -2.416765000 | 0.738189000  |
| 1 | -4.415691000 | -0.776459000 | 1.388427000  |
| 1 | -4.500759000 | -1.038771000 | -0.362776000 |

TS0\_Cp\*; Gibbs free energy ... -1262.30611326 Eh

|    |              |              |             |
|----|--------------|--------------|-------------|
| 45 | 0.692842000  | -0.041249000 | 0.175340000 |
| 8  | 1.198796000  | 1.728194000  | 1.357832000 |
| 6  | 0.307616000  | 2.400973000  | 2.000635000 |
| 6  | -1.481966000 | 0.074835000  | 0.368892000 |

|   |              |              |              |
|---|--------------|--------------|--------------|
| 6 | 0.696161000  | 3.608066000  | 2.798085000  |
| 8 | -0.966066000 | 2.077266000  | 1.961765000  |
| 6 | -1.889952000 | -1.061082000 | 1.119634000  |
| 6 | -2.381878000 | 0.562644000  | -0.611685000 |
| 6 | 1.173442000  | -1.786264000 | -1.032736000 |
| 6 | 2.431232000  | -1.254163000 | -0.486879000 |
| 6 | 2.597602000  | 0.081072000  | -0.988503000 |
| 6 | 1.449814000  | 0.401674000  | -1.842590000 |
| 6 | 0.613046000  | -0.783124000 | -1.916869000 |
| 6 | -3.129361000 | -1.681724000 | 0.914473000  |
| 6 | -3.987523000 | -1.175489000 | -0.074740000 |
| 6 | -3.629517000 | -0.049417000 | -0.835597000 |
| 1 | -4.315938000 | 0.331694000  | -1.582452000 |
| 1 | 0.127985000  | 3.644142000  | 3.726464000  |
| 1 | 1.763274000  | 3.602095000  | 3.006256000  |
| 1 | 0.453251000  | 4.505514000  | 2.224463000  |
| 1 | -1.119131000 | 1.120379000  | 1.179067000  |
| 6 | -0.925063000 | -1.542033000 | 2.157139000  |
| 8 | -1.252215000 | -2.368138000 | 3.064846000  |
| 8 | 0.299382000  | -1.017284000 | 2.063021000  |
| 1 | -3.404501000 | -2.543940000 | 1.512007000  |
| 6 | 1.255354000  | 1.662716000  | -2.612671000 |
| 1 | 1.719250000  | 1.582773000  | -3.602320000 |
| 1 | 0.192137000  | 1.872491000  | -2.752680000 |
| 1 | 1.710129000  | 2.513346000  | -2.099398000 |
| 6 | 3.354631000  | -1.996914000 | 0.415496000  |
| 1 | 2.802394000  | -2.658573000 | 1.086963000  |
| 1 | 4.033837000  | -2.621432000 | -0.175064000 |
| 1 | 3.961727000  | -1.319454000 | 1.018776000  |
| 6 | 0.642467000  | -3.157880000 | -0.796717000 |
| 1 | 1.085112000  | -3.866893000 | -1.504597000 |
| 1 | 0.882825000  | -3.502331000 | 0.212193000  |
| 1 | -0.442335000 | -3.192995000 | -0.923429000 |
| 6 | -0.576105000 | -0.958415000 | -2.793489000 |
| 1 | -1.305778000 | -1.646431000 | -2.359896000 |
| 1 | -1.065774000 | -0.004752000 | -2.998523000 |
| 1 | -0.251800000 | -1.379100000 | -3.751797000 |
| 6 | 3.720934000  | 1.007497000  | -0.681921000 |
| 1 | 3.391632000  | 2.048425000  | -0.689011000 |
| 1 | 4.167530000  | 0.793520000  | 0.291079000  |
| 1 | 4.504206000  | 0.902200000  | -1.440308000 |
| 1 | -4.945397000 | -1.648842000 | -0.255559000 |
| 8 | -1.947564000 | 1.695008000  | -1.294612000 |
| 6 | -2.857416000 | 2.300555000  | -2.270865000 |
| 1 | -2.330293000 | 3.174163000  | -2.644012000 |
| 1 | -3.060529000 | 1.603843000  | -3.088945000 |
| 1 | -3.793414000 | 2.598431000  | -1.791750000 |

TS'0\_Cp\*; Gibbs free energy ... -1262.30091871 Eh

|    |              |              |              |
|----|--------------|--------------|--------------|
| 45 | 0.923414000  | -0.024367000 | 0.155079000  |
| 8  | 1.960580000  | 1.902785000  | 0.139930000  |
| 6  | 1.339239000  | 2.995311000  | -0.141091000 |
| 6  | -1.048156000 | 0.631294000  | -0.555670000 |

|   |              |              |              |
|---|--------------|--------------|--------------|
| 6 | 2.058044000  | 4.308790000  | -0.117983000 |
| 8 | 0.064081000  | 3.001589000  | -0.464084000 |
| 6 | -1.941907000 | 0.516101000  | 0.546736000  |
| 6 | -1.602149000 | 0.446328000  | -1.849719000 |
| 6 | 0.625351000  | -2.173893000 | 0.114428000  |
| 6 | 1.693683000  | -1.898655000 | 1.081166000  |
| 6 | 2.777803000  | -1.259555000 | 0.389111000  |
| 6 | 2.407332000  | -1.159607000 | -1.027686000 |
| 6 | 1.113369000  | -1.773787000 | -1.201311000 |
| 6 | -3.308663000 | 0.257665000  | 0.388272000  |
| 6 | -3.813505000 | 0.081057000  | -0.911815000 |
| 6 | -2.959007000 | 0.177127000  | -2.031943000 |
| 1 | -3.380818000 | 0.047112000  | -3.021687000 |
| 1 | 3.109067000  | 4.164920000  | 0.118784000  |
| 1 | 1.960081000  | 4.796959000  | -1.088677000 |
| 1 | 1.601825000  | 4.965315000  | 0.624727000  |
| 1 | -0.362588000 | 1.830782000  | -0.505671000 |
| 6 | -1.355265000 | 0.708532000  | 1.907555000  |
| 8 | -2.064932000 | 0.864862000  | 2.949641000  |
| 8 | -0.020800000 | 0.723640000  | 1.935630000  |
| 1 | -3.938561000 | 0.197675000  | 1.269585000  |
| 6 | 3.269557000  | -0.603775000 | -2.107807000 |
| 1 | 2.677136000  | -0.304929000 | -2.974893000 |
| 1 | 3.836768000  | 0.262428000  | -1.759900000 |
| 1 | 3.991332000  | -1.358344000 | -2.440127000 |
| 6 | 1.624997000  | -2.192733000 | 2.538275000  |
| 1 | 0.594722000  | -2.167595000 | 2.899126000  |
| 1 | 2.021168000  | -3.195262000 | 2.731924000  |
| 1 | 2.214480000  | -1.482462000 | 3.121247000  |
| 6 | -0.652646000 | -2.887949000 | 0.396841000  |
| 1 | -0.527423000 | -3.969065000 | 0.272694000  |
| 1 | -0.989011000 | -2.707138000 | 1.420894000  |
| 1 | -1.442980000 | -2.561321000 | -0.284311000 |
| 1 | -0.966374000 | 0.540491000  | -2.724834000 |
| 8 | -5.145096000 | -0.182780000 | -1.199570000 |
| 6 | -6.070352000 | -0.307124000 | -0.070296000 |
| 1 | -5.791098000 | -1.154987000 | 0.560057000  |
| 1 | -6.080854000 | 0.610756000  | 0.522457000  |
| 1 | -7.044996000 | -0.474804000 | -0.518339000 |
| 6 | 0.432194000  | -2.031846000 | -2.499807000 |
| 1 | -0.649073000 | -2.118327000 | -2.378764000 |
| 1 | 0.638776000  | -1.250345000 | -3.234020000 |
| 1 | 0.798880000  | -2.978000000 | -2.913355000 |
| 6 | 4.065175000  | -0.795587000 | 0.979414000  |
| 1 | 4.409001000  | 0.128801000  | 0.509478000  |
| 1 | 3.973911000  | -0.621847000 | 2.053475000  |
| 1 | 4.844717000  | -1.550356000 | 0.828642000  |

Int1\_Cp\*; Gibbs free energy ... -1262.32268845 Eh

|    |              |              |             |
|----|--------------|--------------|-------------|
| 45 | 0.537555000  | -0.285262000 | 0.239537000 |
| 8  | 0.452996000  | 1.076731000  | 1.982057000 |
| 6  | 0.197548000  | 2.317801000  | 1.959459000 |
| 6  | -1.488146000 | -0.319738000 | 0.072743000 |

|   |              |              |              |
|---|--------------|--------------|--------------|
| 6 | 0.553304000  | 3.224612000  | 3.089633000  |
| 8 | -0.382736000 | 2.939971000  | 0.920124000  |
| 6 | -2.113597000 | -1.444890000 | 0.649118000  |
| 6 | -2.307506000 | 0.598708000  | -0.603444000 |
| 6 | 2.706441000  | 0.226661000  | -0.381118000 |
| 6 | 2.537845000  | -1.178090000 | -0.426146000 |
| 6 | 1.405119000  | -1.469236000 | -1.331826000 |
| 6 | 0.974357000  | -0.212078000 | -1.927554000 |
| 6 | 1.706553000  | 0.847044000  | -1.276333000 |
| 6 | -3.491400000 | -1.688841000 | 0.487942000  |
| 6 | -4.264287000 | -0.788022000 | -0.253208000 |
| 6 | -3.679433000 | 0.375398000  | -0.792189000 |
| 1 | -4.293629000 | 1.082652000  | -1.337951000 |
| 1 | -0.282494000 | 3.881411000  | 3.327961000  |
| 1 | 0.840015000  | 2.644052000  | 3.961702000  |
| 1 | 1.393365000  | 3.856168000  | 2.790208000  |
| 1 | -0.726751000 | 2.358997000  | 0.150536000  |
| 6 | -1.238956000 | -2.308746000 | 1.488387000  |
| 8 | -1.652208000 | -3.347651000 | 2.094920000  |
| 8 | 0.022820000  | -1.874957000 | 1.587367000  |
| 1 | -3.931434000 | -2.570165000 | 0.943680000  |
| 1 | -5.322225000 | -0.965909000 | -0.404085000 |
| 8 | -1.653652000 | 1.777503000  | -1.037585000 |
| 6 | -2.430408000 | 2.766936000  | -1.788262000 |
| 1 | -2.783548000 | 2.329753000  | -2.724618000 |
| 1 | -3.275481000 | 3.122515000  | -1.193861000 |
| 1 | -1.738029000 | 3.581474000  | -1.987818000 |
| 6 | -0.004846000 | -0.074337000 | -3.044112000 |
| 1 | 0.490818000  | -0.299257000 | -3.994983000 |
| 1 | -0.840120000 | -0.771255000 | -2.935972000 |
| 1 | -0.405876000 | 0.938180000  | -3.101905000 |
| 6 | 3.291764000  | -2.219447000 | 0.329945000  |
| 1 | 3.943251000  | -2.784995000 | -0.344897000 |
| 1 | 3.913682000  | -1.781325000 | 1.112389000  |
| 1 | 2.609243000  | -2.936089000 | 0.796062000  |
| 6 | 3.684578000  | 0.998239000  | 0.440751000  |
| 1 | 4.148297000  | 0.374821000  | 1.207092000  |
| 1 | 4.479419000  | 1.404306000  | -0.194339000 |
| 1 | 3.206061000  | 1.848505000  | 0.937257000  |
| 6 | 1.650992000  | 2.300154000  | -1.612810000 |
| 1 | 1.884474000  | 2.922807000  | -0.745161000 |
| 1 | 2.386134000  | 2.534660000  | -2.391720000 |
| 1 | 0.664178000  | 2.584571000  | -1.986160000 |
| 6 | 0.945215000  | -2.833213000 | -1.723617000 |
| 1 | 1.601146000  | -3.251248000 | -2.495705000 |
| 1 | 0.961763000  | -3.517246000 | -0.871410000 |
| 1 | -0.071492000 | -2.808514000 | -2.123410000 |

Int'1\_Cp\*; Gibbs free energy ... -1262.30941671 Eh

|    |              |              |              |
|----|--------------|--------------|--------------|
| 45 | -0.841691000 | -0.145719000 | -0.209561000 |
| 8  | -0.777385000 | 2.025039000  | -0.834118000 |
| 6  | -0.259260000 | 3.037427000  | -0.292048000 |
| 6  | 1.136509000  | -0.165093000 | 0.332573000  |

|   |              |              |              |
|---|--------------|--------------|--------------|
| 6 | -0.633796000 | 4.440809000  | -0.620428000 |
| 8 | 0.701201000  | 2.941965000  | 0.663931000  |
| 6 | 2.029499000  | -0.385576000 | -0.745460000 |
| 6 | 1.706110000  | 0.022628000  | 1.614933000  |
| 6 | -3.138635000 | -0.095091000 | 0.064759000  |
| 6 | -2.784983000 | -1.313843000 | -0.558615000 |
| 6 | -1.797872000 | -1.999573000 | 0.305298000  |
| 6 | -1.659887000 | -1.220535000 | 1.531141000  |
| 6 | -2.396975000 | 0.003695000  | 1.341969000  |
| 6 | 3.424380000  | -0.417002000 | -0.574002000 |
| 6 | 3.954925000  | -0.223247000 | 0.709731000  |
| 6 | 3.095930000  | -0.002043000 | 1.803670000  |
| 1 | 3.526585000  | 0.148200000  | 2.787232000  |
| 1 | 0.198261000  | 4.936667000  | -1.123628000 |
| 1 | -1.506732000 | 4.453351000  | -1.266286000 |
| 1 | -0.836305000 | 4.994571000  | 0.296711000  |
| 1 | 0.962602000  | 1.998407000  | 0.843722000  |
| 6 | 1.419911000  | -0.571187000 | -2.090233000 |
| 8 | 2.100440000  | -0.762817000 | -3.147921000 |
| 8 | 0.086107000  | -0.513797000 | -2.096486000 |
| 1 | 4.051565000  | -0.590811000 | -1.442726000 |
| 6 | -0.935026000 | -1.650583000 | 2.759750000  |
| 1 | -1.582207000 | -2.302076000 | 3.357087000  |
| 1 | -0.030042000 | -2.213554000 | 2.520323000  |
| 1 | -0.657992000 | -0.800129000 | 3.386200000  |
| 6 | -3.244141000 | -1.832462000 | -1.879508000 |
| 1 | -4.026611000 | -2.586595000 | -1.742693000 |
| 1 | -3.649835000 | -1.038241000 | -2.509118000 |
| 1 | -2.423657000 | -2.311927000 | -2.419915000 |
| 6 | -4.052792000 | 0.963703000  | -0.452717000 |
| 1 | -4.298316000 | 0.807108000  | -1.504533000 |
| 1 | -4.987796000 | 0.969493000  | 0.117967000  |
| 1 | -3.606822000 | 1.957560000  | -0.347837000 |
| 1 | 1.074226000  | 0.204388000  | 2.480288000  |
| 8 | 5.320543000  | -0.226582000 | 1.004645000  |
| 6 | 6.239793000  | -0.441052000 | -0.112065000 |
| 1 | 6.084946000  | -1.427715000 | -0.557374000 |
| 1 | 6.110032000  | 0.332017000  | -0.874603000 |
| 1 | 7.234547000  | -0.375593000 | 0.319351000  |
| 6 | -1.247735000 | -3.365461000 | 0.065989000  |
| 1 | -1.106377000 | -3.555621000 | -1.000525000 |
| 1 | -0.287121000 | -3.503175000 | 0.568379000  |
| 1 | -1.938872000 | -4.125029000 | 0.449194000  |
| 6 | -2.529234000 | 1.120041000  | 2.323849000  |
| 1 | -1.670636000 | 1.155491000  | 2.999251000  |
| 1 | -2.607930000 | 2.086529000  | 1.817746000  |
| 1 | -3.431714000 | 0.994747000  | 2.933027000  |

Int2\_T\_Cp\*; Gibbs free energy ... -1572.47923353 Eh

|    |              |              |              |
|----|--------------|--------------|--------------|
| 45 | 0.377337000  | -0.641487000 | -0.166145000 |
| 6  | -1.471970000 | -0.905325000 | 0.675196000  |
| 6  | -1.467376000 | -1.415259000 | 1.986519000  |
| 6  | -2.718902000 | -0.664738000 | 0.058519000  |

|   |              |              |              |
|---|--------------|--------------|--------------|
| 6 | 0.455498000  | -0.635345000 | -2.421815000 |
| 6 | 1.850750000  | -0.594278000 | -1.961758000 |
| 6 | 2.098796000  | -1.760919000 | -1.185993000 |
| 6 | 0.857275000  | -2.552655000 | -1.156174000 |
| 6 | -0.116849000 | -1.893679000 | -2.000951000 |
| 6 | -2.662530000 | -1.713095000 | 2.673790000  |
| 6 | -3.884857000 | -1.500936000 | 2.031205000  |
| 6 | -3.918976000 | -0.977321000 | 0.724427000  |
| 1 | -2.607517000 | -2.101552000 | 3.685634000  |
| 1 | -4.877701000 | -0.806613000 | 0.247431000  |
| 6 | -0.135542000 | -1.593189000 | 2.613670000  |
| 8 | 0.039753000  | -2.032062000 | 3.794541000  |
| 8 | 0.890755000  | -1.237203000 | 1.831815000  |
| 6 | -0.094437000 | 1.601129000  | 0.314601000  |
| 6 | 1.130243000  | 1.344015000  | 0.486416000  |
| 6 | 3.373638000  | -2.162408000 | -0.524294000 |
| 1 | 3.852434000  | -2.975905000 | -1.080769000 |
| 1 | 4.078061000  | -1.329543000 | -0.470409000 |
| 1 | 3.196061000  | -2.525740000 | 0.492317000  |
| 6 | -1.417204000 | -2.487846000 | -2.427872000 |
| 1 | -2.012251000 | -1.776765000 | -2.999731000 |
| 1 | -1.220233000 | -3.364192000 | -3.055802000 |
| 1 | -2.016145000 | -2.824868000 | -1.576409000 |
| 6 | -0.167295000 | 0.360543000  | -3.339406000 |
| 1 | 0.138940000  | 1.379707000  | -3.087167000 |
| 1 | 0.139934000  | 0.171508000  | -4.374712000 |
| 1 | -1.255904000 | 0.308325000  | -3.289198000 |
| 6 | -1.326855000 | 2.335758000  | 0.285809000  |
| 6 | -2.299459000 | 2.181757000  | 1.301669000  |
| 6 | -1.553644000 | 3.275922000  | -0.749135000 |
| 6 | -3.470075000 | 2.950090000  | 1.278748000  |
| 6 | -2.726632000 | 4.040008000  | -0.764032000 |
| 6 | -3.690336000 | 3.879398000  | 0.247574000  |
| 1 | -2.130944000 | 1.462469000  | 2.095971000  |
| 1 | -0.806602000 | 3.402137000  | -1.525366000 |
| 1 | -4.209245000 | 2.821082000  | 2.060824000  |
| 1 | -2.886676000 | 4.761485000  | -1.556530000 |
| 1 | -4.596319000 | 4.473466000  | 0.234496000  |
| 6 | 2.515487000  | 1.635612000  | 0.748726000  |
| 6 | 3.039354000  | 2.885403000  | 0.334754000  |
| 6 | 3.368192000  | 0.700166000  | 1.375354000  |
| 6 | 4.390917000  | 3.184598000  | 0.543097000  |
| 6 | 4.717587000  | 1.009793000  | 1.582691000  |
| 6 | 5.235618000  | 2.248150000  | 1.164527000  |
| 1 | 2.385262000  | 3.599868000  | -0.153909000 |
| 1 | 2.952216000  | -0.250086000 | 1.692891000  |
| 1 | 4.785294000  | 4.139158000  | 0.215055000  |
| 1 | 5.366874000  | 0.286239000  | 2.061825000  |
| 1 | 6.282292000  | 2.480319000  | 1.321348000  |
| 1 | -4.817415000 | -1.729041000 | 2.534052000  |
| 8 | -2.680068000 | -0.081335000 | -1.208882000 |
| 6 | -3.950758000 | 0.121370000  | -1.896160000 |
| 1 | -3.692154000 | 0.577081000  | -2.849853000 |



|   |              |              |              |
|---|--------------|--------------|--------------|
| 1 | -4.457757000 | -0.835377000 | -2.061782000 |
| 1 | -4.603944000 | 0.791687000  | -1.328206000 |
| 6 | 2.821433000  | 0.480899000  | -2.313234000 |
| 1 | 3.676551000  | 0.498249000  | -1.632703000 |
| 1 | 3.202466000  | 0.321766000  | -3.328241000 |
| 1 | 2.351173000  | 1.468717000  | -2.295197000 |
| 6 | 0.711869000  | -3.895624000 | -0.522285000 |
| 1 | 1.069518000  | -4.677784000 | -1.201844000 |
| 1 | 1.299994000  | -3.962308000 | 0.396092000  |
| 1 | -0.331048000 | -4.113854000 | -0.280905000 |

Int'2\_T\_Cp\*; Gibbs free energy ... -1572.47465822 Eh

|    |              |              |              |
|----|--------------|--------------|--------------|
| 45 | -0.565715000 | -0.614751000 | 0.228496000  |
| 6  | 1.441611000  | -0.640763000 | -0.188627000 |
| 6  | 1.761465000  | -0.872154000 | -1.546356000 |
| 6  | 2.495955000  | -0.432833000 | 0.713043000  |
| 6  | -1.272693000 | -0.815605000 | 2.352259000  |
| 6  | -2.485698000 | -0.978736000 | 1.537068000  |
| 6  | -2.289232000 | -2.088064000 | 0.676201000  |
| 6  | -0.950313000 | -2.646465000 | 0.944777000  |
| 6  | -0.381091000 | -1.912433000 | 2.059664000  |
| 6  | 3.090870000  | -0.895524000 | -1.994605000 |
| 6  | 4.127702000  | -0.682282000 | -1.076239000 |
| 6  | 3.834129000  | -0.457288000 | 0.283535000  |
| 1  | 3.308296000  | -1.067496000 | -3.044198000 |
| 1  | 4.624373000  | -0.284022000 | 1.005400000  |
| 6  | 0.622310000  | -1.047412000 | -2.478810000 |
| 8  | 0.749507000  | -1.277203000 | -3.723030000 |
| 8  | -0.576140000 | -0.931662000 | -1.895937000 |
| 6  | -0.212912000 | 1.732393000  | 0.124339000  |
| 6  | -1.346010000 | 1.433039000  | -0.334287000 |
| 6  | -3.237438000 | -2.633186000 | -0.337608000 |
| 1  | -2.733985000 | -2.817740000 | -1.291466000 |
| 1  | -3.647611000 | -3.589875000 | 0.004115000  |
| 1  | -4.071156000 | -1.950948000 | -0.517154000 |
| 6  | 0.849529000  | -2.281766000 | 2.814743000  |
| 1  | 1.275011000  | -1.427201000 | 3.344966000  |
| 1  | 0.599783000  | -3.041971000 | 3.563295000  |
| 1  | 1.618783000  | -2.701318000 | 2.162633000  |
| 6  | -1.101673000 | 0.207761000  | 3.424515000  |
| 1  | -1.500436000 | 1.176920000  | 3.110560000  |
| 1  | -1.641287000 | -0.091278000 | 4.330207000  |
| 1  | -0.049416000 | 0.340816000  | 3.687559000  |
| 1  | 2.293296000  | -0.216238000 | 1.758207000  |
| 8  | 5.425530000  | -0.698575000 | -1.602852000 |
| 6  | 6.517959000  | -0.383986000 | -0.685927000 |
| 1  | 6.377403000  | 0.605835000  | -0.239955000 |
| 1  | 6.594579000  | -1.135937000 | 0.104932000  |
| 1  | 7.416722000  | -0.393508000 | -1.296225000 |
| 6  | 1.028601000  | 2.376225000  | 0.438978000  |
| 6  | 1.984418000  | 2.591310000  | -0.583622000 |
| 6  | 1.332585000  | 2.772107000  | 1.761336000  |
| 6  | 3.211601000  | 3.192294000  | -0.285473000 |

|   |              |              |              |
|---|--------------|--------------|--------------|
| 6 | 2.564691000  | 3.370776000  | 2.052184000  |
| 6 | 3.510070000  | 3.579573000  | 1.032799000  |
| 1 | 1.755590000  | 2.278210000  | -1.596757000 |
| 1 | 0.603455000  | 2.609553000  | 2.546790000  |
| 1 | 3.939034000  | 3.346873000  | -1.074001000 |
| 1 | 2.788821000  | 3.668109000  | 3.069726000  |
| 1 | 4.465276000  | 4.037482000  | 1.260632000  |
| 6 | -2.673984000 | 1.616687000  | -0.859701000 |
| 6 | -3.416798000 | 2.765599000  | -0.494377000 |
| 6 | -3.258966000 | 0.657390000  | -1.716403000 |
| 6 | -4.717371000 | 2.944727000  | -0.982417000 |
| 6 | -4.556853000 | 0.847647000  | -2.203430000 |
| 6 | -5.292337000 | 1.989262000  | -1.838429000 |
| 1 | -2.975932000 | 3.496012000  | 0.174772000  |
| 1 | -2.676658000 | -0.217083000 | -1.988023000 |
| 1 | -5.282259000 | 3.823474000  | -0.694589000 |
| 1 | -4.995285000 | 0.108494000  | -2.863848000 |
| 1 | -6.298316000 | 2.131737000  | -2.214771000 |
| 6 | -0.399789000 | -3.883931000 | 0.317739000  |
| 1 | -0.861100000 | -4.775670000 | 0.757405000  |
| 1 | -0.603647000 | -3.905121000 | -0.756368000 |
| 1 | 0.680261000  | -3.957690000 | 0.462260000  |
| 6 | -3.709308000 | -0.137331000 | 1.670577000  |
| 1 | -4.306007000 | -0.132689000 | 0.754530000  |
| 1 | -4.339924000 | -0.520382000 | 2.480968000  |
| 1 | -3.457260000 | 0.897904000  | 1.916009000  |

**Int2\_H\_Cp\***; Gibbs free energy ... -1267.74005190 Eh

|    |              |              |              |
|----|--------------|--------------|--------------|
| 45 | 0.452821000  | -0.293550000 | 0.031263000  |
| 6  | -1.542869000 | -0.213140000 | 0.463143000  |
| 6  | -1.899253000 | -0.679722000 | 1.744650000  |
| 6  | -2.579791000 | 0.243835000  | -0.380557000 |
| 6  | 2.318407000  | -0.406779000 | -1.330344000 |
| 6  | 2.201074000  | -1.623246000 | -0.604082000 |
| 6  | 0.897352000  | -2.224568000 | -0.941302000 |
| 6  | 0.269279000  | -1.401192000 | -1.950417000 |
| 6  | 1.089757000  | -0.224386000 | -2.120540000 |
| 6  | -3.240149000 | -0.717492000 | 2.182889000  |
| 6  | -4.247842000 | -0.274766000 | 1.323877000  |
| 6  | -3.922896000 | 0.209193000  | 0.040864000  |
| 1  | -3.457979000 | -1.086960000 | 3.179979000  |
| 1  | -4.716331000 | 0.557154000  | -0.611403000 |
| 1  | -5.286142000 | -0.293120000 | 1.634528000  |
| 6  | -0.781669000 | -1.118461000 | 2.614611000  |
| 8  | -0.936514000 | -1.564604000 | 3.797082000  |
| 8  | 0.426829000  | -1.000262000 | 2.054684000  |
| 6  | 0.324660000  | 1.993957000  | 0.335524000  |
| 6  | 1.273506000  | 1.548904000  | 1.031247000  |
| 6  | 2.421074000  | 1.422328000  | 1.947862000  |
| 1  | 2.119196000  | 0.822187000  | 2.811884000  |
| 1  | 3.224778000  | 0.863641000  | 1.453003000  |
| 6  | -0.604216000 | 2.970774000  | -0.266351000 |
| 1  | -1.615660000 | 2.793497000  | 0.117635000  |

|   |              |              |              |
|---|--------------|--------------|--------------|
| 1 | -0.664706000 | 2.807883000  | -1.346379000 |
| 6 | 2.940195000  | 2.800505000  | 2.395250000  |
| 1 | 3.268890000  | 3.388130000  | 1.533507000  |
| 1 | 2.157661000  | 3.361859000  | 2.911691000  |
| 1 | 3.786396000  | 2.679925000  | 3.075078000  |
| 6 | -0.158150000 | 4.411872000  | 0.036344000  |
| 1 | 0.827130000  | 4.609140000  | -0.395247000 |
| 1 | -0.869603000 | 5.122941000  | -0.389602000 |
| 1 | -0.098113000 | 4.585477000  | 1.114180000  |
| 8 | -2.185882000 | 0.729431000  | -1.629729000 |
| 6 | -3.222213000 | 1.263633000  | -2.503385000 |
| 1 | -3.950170000 | 0.489192000  | -2.767434000 |
| 1 | -3.737803000 | 2.105443000  | -2.028495000 |
| 1 | -2.698945000 | 1.601115000  | -3.395664000 |
| 6 | 0.406247000  | -3.549895000 | -0.459994000 |
| 1 | -0.680391000 | -3.624164000 | -0.549331000 |
| 1 | 0.847149000  | -4.361825000 | -1.050209000 |
| 1 | 0.677194000  | -3.720951000 | 0.584908000  |
| 6 | 0.849559000  | 0.895569000  | -3.075625000 |
| 1 | 1.285611000  | 1.828576000  | -2.706666000 |
| 1 | 1.305206000  | 0.680488000  | -4.049357000 |
| 1 | -0.220753000 | 1.053723000  | -3.223856000 |
| 6 | 3.461066000  | 0.554396000  | -1.328864000 |
| 1 | 4.239723000  | 0.254662000  | -0.624375000 |
| 1 | 3.911213000  | 0.612269000  | -2.325559000 |
| 1 | 3.134464000  | 1.567676000  | -1.065583000 |
| 6 | -0.956519000 | -1.771991000 | -2.718524000 |
| 1 | -1.306855000 | -0.941833000 | -3.331055000 |
| 1 | -0.728631000 | -2.621411000 | -3.372685000 |
| 1 | -1.775991000 | -2.076030000 | -2.061139000 |
| 6 | 3.171807000  | -2.213978000 | 0.363319000  |
| 1 | 2.679107000  | -2.449250000 | 1.312380000  |
| 1 | 3.588881000  | -3.147910000 | -0.028194000 |
| 1 | 3.998575000  | -1.531965000 | 0.571096000  |

**Int'2\_H\_Cp\***; Gibbs free energy ... -1267.73851876 Eh

|    |              |              |              |
|----|--------------|--------------|--------------|
| 45 | 0.675843000  | -0.272995000 | 0.097227000  |
| 6  | -1.350522000 | -0.080474000 | -0.086601000 |
| 6  | -2.060856000 | -0.134389000 | 1.137382000  |
| 6  | -2.087722000 | 0.087173000  | -1.269374000 |
| 6  | 2.808925000  | -0.701325000 | -0.704909000 |
| 6  | 2.478521000  | -1.704318000 | 0.244655000  |
| 6  | 1.259879000  | -2.388477000 | -0.223684000 |
| 6  | 0.906899000  | -1.841922000 | -1.513945000 |
| 6  | 1.798678000  | -0.734027000 | -1.774920000 |
| 6  | -3.459048000 | -0.035135000 | 1.182778000  |
| 6  | -4.174349000 | 0.121634000  | -0.012280000 |
| 6  | -3.491716000 | 0.184477000  | -1.243493000 |
| 1  | -3.978332000 | -0.083434000 | 2.134944000  |
| 1  | -4.031457000 | 0.311662000  | -2.175199000 |
| 6  | -1.252438000 | -0.310423000 | 2.368765000  |
| 8  | -1.747902000 | -0.374052000 | 3.539374000  |
| 8  | 0.062285000  | -0.400252000 | 2.145758000  |

|   |              |              |              |
|---|--------------|--------------|--------------|
| 6 | 0.595704000  | 1.989167000  | -0.250729000 |
| 6 | 1.309670000  | 1.785470000  | 0.763896000  |
| 6 | 2.168168000  | 1.938236000  | 1.952048000  |
| 1 | 1.592192000  | 1.658096000  | 2.839602000  |
| 1 | 3.003256000  | 1.229513000  | 1.894302000  |
| 6 | -0.096884000 | 2.700279000  | -1.342238000 |
| 1 | -1.147585000 | 2.845791000  | -1.066787000 |
| 1 | -0.103516000 | 2.083035000  | -2.246671000 |
| 6 | 2.707853000  | 3.373641000  | 2.080629000  |
| 1 | 3.304905000  | 3.642889000  | 1.204754000  |
| 1 | 1.890080000  | 4.092861000  | 2.170414000  |
| 1 | 3.339901000  | 3.454923000  | 2.967555000  |
| 6 | 0.572875000  | 4.054687000  | -1.633514000 |
| 1 | 1.612221000  | 3.912380000  | -1.943286000 |
| 1 | 0.041752000  | 4.573170000  | -2.434691000 |
| 1 | 0.567766000  | 4.691467000  | -0.745195000 |
| 6 | 0.624093000  | -3.561148000 | 0.446530000  |
| 1 | -0.410450000 | -3.694617000 | 0.121669000  |
| 1 | 1.171667000  | -4.480557000 | 0.209332000  |
| 1 | 0.630056000  | -3.447187000 | 1.533687000  |
| 6 | 1.831108000  | 0.099364000  | -3.013204000 |
| 1 | 2.228474000  | 1.098139000  | -2.812347000 |
| 1 | 2.474604000  | -0.363248000 | -3.770425000 |
| 1 | 0.833664000  | 0.208369000  | -3.448155000 |
| 6 | 3.948476000  | 0.262858000  | -0.659892000 |
| 1 | 4.493614000  | 0.201909000  | 0.284119000  |
| 1 | 4.654431000  | 0.061500000  | -1.472559000 |
| 1 | 3.598597000  | 1.294807000  | -0.784400000 |
| 1 | -1.582777000 | 0.154926000  | -2.229813000 |
| 8 | -5.567159000 | 0.206748000  | 0.115810000  |
| 6 | -6.340691000 | 0.364804000  | -1.113105000 |
| 1 | -6.079802000 | 1.297919000  | -1.621078000 |
| 1 | -6.174406000 | -0.479569000 | -1.788500000 |
| 1 | -7.380243000 | 0.389964000  | -0.798237000 |
| 6 | -0.165298000 | -2.353556000 | -2.415666000 |
| 1 | -1.041625000 | -2.683407000 | -1.852062000 |
| 1 | -0.486695000 | -1.595901000 | -3.133430000 |
| 1 | 0.205852000  | -3.212531000 | -2.985124000 |
| 6 | 3.195223000  | -2.035733000 | 1.512263000  |
| 1 | 3.959362000  | -1.292447000 | 1.746854000  |
| 1 | 2.501038000  | -2.088864000 | 2.356640000  |
| 1 | 3.683989000  | -3.012776000 | 1.432171000  |

TS2\_T\_Cp\*; Gibbs free energy ... -1572.45589213 Eh

|    |              |              |              |
|----|--------------|--------------|--------------|
| 45 | 0.675052000  | -0.789094000 | -0.017593000 |
| 6  | -1.258525000 | -0.648939000 | 0.807799000  |
| 6  | -1.263129000 | -0.801484000 | 2.216479000  |
| 6  | -2.460142000 | -0.938838000 | 0.107870000  |
| 6  | 2.084577000  | -1.102839000 | -1.785887000 |
| 6  | 2.541506000  | -1.861382000 | -0.661462000 |
| 6  | 1.494759000  | -2.851780000 | -0.330941000 |
| 6  | 0.420660000  | -2.699523000 | -1.260775000 |
| 6  | 0.743571000  | -1.569448000 | -2.125173000 |

|   |              |              |              |
|---|--------------|--------------|--------------|
| 6 | 2.817088000  | -0.032262000 | -2.527229000 |
| 6 | -2.428679000 | -1.175257000 | 2.909433000  |
| 6 | -3.599474000 | -1.452184000 | 2.194755000  |
| 6 | -3.614895000 | -1.347957000 | 0.790824000  |
| 6 | 1.606606000  | -3.885269000 | 0.739589000  |
| 6 | -0.801262000 | -3.555847000 | -1.324502000 |
| 1 | -0.559324000 | -4.530763000 | -1.761309000 |
| 1 | -2.387177000 | -1.269075000 | 3.989487000  |
| 1 | -4.523390000 | -1.576732000 | 0.245848000  |
| 1 | 0.623321000  | -4.223105000 | 1.075803000  |
| 1 | -1.580499000 | -3.094402000 | -1.933074000 |
| 1 | 2.171211000  | 0.828587000  | -2.725515000 |
| 1 | 2.150196000  | -4.761525000 | 0.367872000  |
| 1 | -1.216341000 | -3.737133000 | -0.328094000 |
| 1 | 3.691103000  | 0.317850000  | -1.974417000 |
| 1 | 2.153773000  | -3.505744000 | 1.605510000  |
| 1 | 3.161404000  | -0.412710000 | -3.495199000 |
| 6 | 0.034308000  | -0.629678000 | 2.918330000  |
| 8 | 0.132684000  | -0.520163000 | 4.183153000  |
| 8 | 1.098620000  | -0.630408000 | 2.114316000  |
| 6 | -0.559964000 | 1.115403000  | 0.153635000  |
| 6 | 0.736550000  | 1.268021000  | 0.231572000  |
| 6 | 1.786998000  | 2.242014000  | 0.387319000  |
| 6 | 1.465537000  | 3.623381000  | 0.456208000  |
| 6 | 3.141517000  | 1.854396000  | 0.488815000  |
| 6 | 2.477440000  | 4.577090000  | 0.610106000  |
| 6 | 4.150583000  | 2.812619000  | 0.640411000  |
| 6 | 3.823576000  | 4.178419000  | 0.698774000  |
| 1 | 0.427591000  | 3.933249000  | 0.392709000  |
| 1 | 3.381497000  | 0.795676000  | 0.464263000  |
| 1 | 2.220018000  | 5.628771000  | 0.658841000  |
| 1 | 5.184865000  | 2.498032000  | 0.717131000  |
| 1 | 4.603029000  | 4.921184000  | 0.819600000  |
| 6 | -1.729513000 | 1.885534000  | -0.272303000 |
| 6 | -2.875502000 | 1.988916000  | 0.544673000  |
| 6 | -1.677096000 | 2.612402000  | -1.483268000 |
| 6 | -3.950363000 | 2.798441000  | 0.156319000  |
| 6 | -2.758040000 | 3.415460000  | -1.871612000 |
| 6 | -3.899202000 | 3.507660000  | -1.055548000 |
| 1 | -2.909609000 | 1.447096000  | 1.484618000  |
| 1 | -0.792174000 | 2.540587000  | -2.108866000 |
| 1 | -4.823032000 | 2.874196000  | 0.794300000  |
| 1 | -2.711905000 | 3.965286000  | -2.804325000 |
| 1 | -4.735686000 | 4.126554000  | -1.358050000 |
| 1 | -4.499567000 | -1.755799000 | 2.715534000  |
| 8 | -2.403216000 | -0.766286000 | -1.269554000 |
| 6 | -3.661707000 | -0.821100000 | -2.009463000 |
| 1 | -3.403150000 | -0.569909000 | -3.035788000 |
| 1 | -4.095358000 | -1.824758000 | -1.968068000 |
| 1 | -4.373015000 | -0.090586000 | -1.610318000 |
| 6 | 3.875780000  | -1.805048000 | 0.005651000  |
| 1 | 3.780226000  | -1.766295000 | 1.094935000  |
| 1 | 4.454753000  | -2.703283000 | -0.235995000 |

|   |              |              |              |
|---|--------------|--------------|--------------|
| 1 | 4.457203000  | -0.939445000 | -0.318719000 |
| 6 | -0.034064000 | -1.108220000 | -3.310774000 |
| 1 | 0.419969000  | -1.499659000 | -4.228972000 |
| 1 | -1.067620000 | -1.449983000 | -3.266532000 |
| 1 | -0.038594000 | -0.017195000 | -3.389817000 |

TS'2\_T\_Cp\*; Gibbs free energy ... -1572.45023754 Eh

|    |              |              |              |
|----|--------------|--------------|--------------|
| 45 | -0.552985000 | -0.915040000 | 0.147725000  |
| 6  | 1.391141000  | -0.206045000 | -0.295902000 |
| 6  | 1.752173000  | -0.467062000 | -1.646132000 |
| 6  | 2.427193000  | -0.041453000 | 0.646438000  |
| 6  | -2.155630000 | -1.474776000 | 1.675521000  |
| 6  | -2.114067000 | -2.469657000 | 0.647955000  |
| 6  | -0.775322000 | -3.097104000 | 0.677026000  |
| 6  | -0.018782000 | -2.493808000 | 1.725577000  |
| 6  | -0.832696000 | -1.423269000 | 2.295066000  |
| 6  | -3.316493000 | -0.622690000 | 2.074603000  |
| 6  | 3.093951000  | -0.502929000 | -2.040818000 |
| 6  | 4.106631000  | -0.331727000 | -1.082799000 |
| 6  | 3.773126000  | -0.123905000 | 0.271766000  |
| 6  | -0.355905000 | -4.222162000 | -0.209077000 |
| 6  | 1.356843000  | -2.868928000 | 2.162604000  |
| 1  | 1.310679000  | -3.560695000 | 3.010684000  |
| 1  | 3.346220000  | -0.701473000 | -3.077254000 |
| 1  | 4.542061000  | -0.002430000 | 1.025191000  |
| 1  | 0.731594000  | -4.292436000 | -0.285649000 |
| 1  | 1.929181000  | -1.995564000 | 2.485479000  |
| 1  | -3.034531000 | 0.432117000  | 2.148610000  |
| 1  | -0.727011000 | -5.175732000 | 0.183142000  |
| 1  | 1.912019000  | -3.360109000 | 1.359586000  |
| 1  | -4.137135000 | -0.700466000 | 1.358664000  |
| 1  | -0.764724000 | -4.103436000 | -1.215623000 |
| 1  | -3.692038000 | -0.931471000 | 3.055958000  |
| 6  | 0.663250000  | -0.803406000 | -2.601357000 |
| 8  | 0.827490000  | -0.834915000 | -3.862991000 |
| 8  | -0.496910000 | -1.103730000 | -2.018936000 |
| 6  | 0.022858000  | 1.258548000  | -0.025018000 |
| 6  | -1.189038000 | 0.969789000  | -0.424493000 |
| 6  | -2.425349000 | 1.504774000  | -0.929654000 |
| 6  | -2.563365000 | 2.902915000  | -1.138749000 |
| 6  | -3.519704000 | 0.661233000  | -1.227960000 |
| 6  | -3.767445000 | 3.428682000  | -1.619725000 |
| 6  | -4.722500000 | 1.193075000  | -1.705740000 |
| 6  | -4.852627000 | 2.578907000  | -1.902367000 |
| 1  | -1.728191000 | 3.559983000  | -0.919444000 |
| 1  | -3.402273000 | -0.409006000 | -1.087305000 |
| 1  | -3.862614000 | 4.497494000  | -1.772022000 |
| 1  | -5.552860000 | 0.533764000  | -1.930216000 |
| 1  | -5.783603000 | 2.989888000  | -2.274506000 |
| 6  | 0.711659000  | 2.367996000  | 0.634574000  |
| 6  | 1.927165000  | 2.885489000  | 0.137054000  |
| 6  | 0.099592000  | 2.989882000  | 1.746941000  |
| 6  | 2.518850000  | 4.002021000  | 0.739968000  |

|   |              |              |              |
|---|--------------|--------------|--------------|
| 6 | 0.701360000  | 4.100216000  | 2.354570000  |
| 6 | 1.912199000  | 4.608505000  | 1.854026000  |
| 1 | 2.391897000  | 2.415967000  | -0.723827000 |
| 1 | -0.839719000 | 2.597278000  | 2.124525000  |
| 1 | 3.447778000  | 4.396873000  | 0.345990000  |
| 1 | 0.227801000  | 4.567528000  | 3.209848000  |
| 1 | 2.377439000  | 5.465974000  | 2.325654000  |
| 1 | 2.185026000  | 0.178391000  | 1.682473000  |
| 8 | 5.414339000  | -0.395601000 | -1.562140000 |
| 6 | 6.493955000  | -0.221570000 | -0.589739000 |
| 1 | 6.418733000  | 0.754724000  | -0.102880000 |
| 1 | 6.466494000  | -1.014488000 | 0.162605000  |
| 1 | 7.411232000  | -0.281294000 | -1.167872000 |
| 6 | -0.461059000 | -0.570800000 | 3.462830000  |
| 1 | -0.662576000 | -1.104549000 | 4.398889000  |
| 1 | 0.601291000  | -0.312411000 | 3.455894000  |
| 1 | -1.040344000 | 0.354768000  | 3.479458000  |
| 6 | -3.229939000 | -2.932378000 | -0.230441000 |
| 1 | -2.939129000 | -2.930619000 | -1.285674000 |
| 1 | -3.509852000 | -3.960359000 | 0.024632000  |
| 1 | -4.118792000 | -2.307052000 | -0.120634000 |

TS2\_H\_Cp\*; Gibbs free energy ... -1267.71487956 Eh

|    |              |              |              |
|----|--------------|--------------|--------------|
| 45 | 0.629834000  | 0.007338000  | 0.109580000  |
| 6  | -1.471841000 | 0.143731000  | 0.339276000  |
| 6  | -1.841956000 | 0.884290000  | 1.488672000  |
| 6  | -2.414210000 | -0.782860000 | -0.179346000 |
| 6  | 2.543422000  | -0.940001000 | -0.679820000 |
| 6  | 2.647072000  | -0.725984000 | 0.732603000  |
| 6  | 1.618187000  | -1.552298000 | 1.398162000  |
| 6  | 0.890162000  | -2.249779000 | 0.388605000  |
| 6  | 1.405923000  | -1.821639000 | -0.912793000 |
| 6  | 3.446497000  | -0.392977000 | -1.736033000 |
| 6  | -3.108310000 | 0.736179000  | 2.083296000  |
| 6  | -4.015692000 | -0.188636000 | 1.554683000  |
| 6  | -3.667176000 | -0.958925000 | 0.427618000  |
| 6  | 1.444683000  | -1.669754000 | 2.875836000  |
| 6  | -0.200094000 | -3.244597000 | 0.614605000  |
| 1  | 0.224596000  | -4.238431000 | 0.794368000  |
| 1  | -3.349774000 | 1.329890000  | 2.958767000  |
| 1  | -4.376115000 | -1.677587000 | 0.033295000  |
| 1  | 0.453280000  | -2.051260000 | 3.131905000  |
| 1  | -0.856683000 | -3.307568000 | -0.254400000 |
| 1  | -4.990130000 | -0.324279000 | 2.008543000  |
| 1  | 2.916795000  | -0.244046000 | -2.680536000 |
| 1  | 2.185939000  | -2.358535000 | 3.297106000  |
| 1  | -0.809343000 | -2.982092000 | 1.484661000  |
| 1  | 3.890287000  | 0.559443000  | -1.434148000 |
| 1  | 1.578130000  | -0.704512000 | 3.371294000  |
| 1  | 4.266296000  | -1.093826000 | -1.928521000 |
| 6  | -0.807026000 | 1.774101000  | 2.078399000  |
| 8  | -1.073754000 | 2.647431000  | 2.968903000  |
| 8  | 0.425838000  | 1.569183000  | 1.620447000  |

|   |              |              |              |
|---|--------------|--------------|--------------|
| 6 | -0.817404000 | 1.323855000  | -1.162227000 |
| 6 | 0.436536000  | 1.646136000  | -1.165819000 |
| 6 | 1.475842000  | 2.542465000  | -1.733055000 |
| 1 | 2.073550000  | 1.971548000  | -2.453931000 |
| 1 | 0.985083000  | 3.345098000  | -2.297043000 |
| 6 | -2.095614000 | 1.573726000  | -1.905054000 |
| 1 | -2.867515000 | 1.904496000  | -1.199207000 |
| 1 | -2.454574000 | 0.636459000  | -2.341082000 |
| 8 | -2.014668000 | -1.471280000 | -1.326301000 |
| 6 | -2.998779000 | -2.338849000 | -1.971567000 |
| 1 | -2.505564000 | -2.714252000 | -2.864796000 |
| 1 | -3.273216000 | -3.171974000 | -1.317344000 |
| 1 | -3.892931000 | -1.770694000 | -2.245951000 |
| 6 | -1.885814000 | 2.624022000  | -3.003563000 |
| 1 | -2.828245000 | 2.809385000  | -3.524104000 |
| 1 | -1.534712000 | 3.570995000  | -2.585180000 |
| 1 | -1.149636000 | 2.281565000  | -3.736089000 |
| 6 | 2.408381000  | 3.138526000  | -0.669547000 |
| 1 | 2.876146000  | 2.337409000  | -0.087867000 |
| 1 | 3.194504000  | 3.734669000  | -1.139509000 |
| 1 | 1.854085000  | 3.773349000  | 0.025575000  |
| 6 | 3.670289000  | 0.085433000  | 1.455090000  |
| 1 | 4.242963000  | 0.714138000  | 0.769678000  |
| 1 | 3.208829000  | 0.729364000  | 2.209357000  |
| 1 | 4.375353000  | -0.572028000 | 1.976443000  |
| 6 | 0.987598000  | -2.355849000 | -2.240660000 |
| 1 | -0.062873000 | -2.650429000 | -2.227783000 |
| 1 | 1.125490000  | -1.610164000 | -3.028720000 |
| 1 | 1.587460000  | -3.233945000 | -2.507598000 |

TS'2\_H\_Cp\*; Gibbs free energy ... -1267.71387920 Eh

|    |              |              |              |
|----|--------------|--------------|--------------|
| 45 | 0.831563000  | -0.121784000 | 0.095134000  |
| 6  | -1.220784000 | 0.143462000  | -0.355635000 |
| 6  | -2.017865000 | 0.234486000  | 0.813032000  |
| 6  | -1.848894000 | -0.287784000 | -1.550378000 |
| 6  | 2.963267000  | -0.668478000 | -0.482865000 |
| 6  | 2.619157000  | -1.324075000 | 0.741440000  |
| 6  | 1.500463000  | -2.250704000 | 0.466309000  |
| 6  | 1.170599000  | -2.150055000 | -0.916869000 |
| 6  | 2.009054000  | -1.101125000 | -1.499647000 |
| 6  | 4.087747000  | 0.288151000  | -0.707987000 |
| 6  | -3.398080000 | -0.029441000 | 0.786732000  |
| 6  | -3.992146000 | -0.443756000 | -0.413308000 |
| 6  | -3.208523000 | -0.594078000 | -1.578354000 |
| 6  | 0.891511000  | -3.177574000 | 1.465487000  |
| 6  | 0.149840000  | -2.959202000 | -1.645118000 |
| 1  | 0.589698000  | -3.901037000 | -1.991299000 |
| 1  | -3.957691000 | 0.062919000  | 1.712014000  |
| 1  | -3.683185000 | -0.936712000 | -2.490568000 |
| 1  | -0.139464000 | -3.427537000 | 1.201544000  |
| 1  | -0.226952000 | -2.433119000 | -2.525372000 |
| 1  | 3.829364000  | 1.037838000  | -1.460654000 |
| 1  | 1.458424000  | -4.114049000 | 1.518469000  |



|   |              |              |              |
|---|--------------|--------------|--------------|
| 1 | -0.703229000 | -3.207065000 | -1.007584000 |
| 1 | 4.370520000  | 0.808037000  | 0.210945000  |
| 1 | 0.891268000  | -2.738435000 | 2.466294000  |
| 1 | 4.972340000  | -0.247064000 | -1.070623000 |
| 6 | -1.327843000 | 0.526502000  | 2.095575000  |
| 8 | -1.950305000 | 0.858928000  | 3.157885000  |
| 8 | -0.006645000 | 0.376503000  | 2.051036000  |
| 6 | -0.147948000 | 1.784254000  | -0.702690000 |
| 6 | 0.929855000  | 1.955403000  | 0.001745000  |
| 6 | 1.962981000  | 2.907134000  | 0.481616000  |
| 1 | 2.833065000  | 2.841133000  | -0.183640000 |
| 1 | 1.571970000  | 3.926869000  | 0.381612000  |
| 6 | -0.940731000 | 2.474267000  | -1.772810000 |
| 1 | -2.002570000 | 2.483674000  | -1.499702000 |
| 1 | -0.871192000 | 1.894804000  | -2.701089000 |
| 6 | -0.424421000 | 3.899536000  | -2.002424000 |
| 1 | -1.006726000 | 4.389386000  | -2.786100000 |
| 1 | -0.504672000 | 4.498478000  | -1.091373000 |
| 1 | 0.625603000  | 3.890561000  | -2.308701000 |
| 6 | 2.420435000  | 2.657322000  | 1.925560000  |
| 1 | 2.778765000  | 1.628280000  | 2.037259000  |
| 1 | 3.231702000  | 3.339302000  | 2.192542000  |
| 1 | 1.597016000  | 2.798121000  | 2.629210000  |
| 6 | 3.312981000  | -1.206045000 | 2.057762000  |
| 1 | 3.989762000  | -0.348937000 | 2.079371000  |
| 1 | 2.596222000  | -1.096903000 | 2.877047000  |
| 1 | 3.903347000  | -2.106625000 | 2.261458000  |
| 6 | 2.022362000  | -0.679820000 | -2.931675000 |
| 1 | 1.033431000  | -0.779592000 | -3.386956000 |
| 1 | 2.340217000  | 0.361852000  | -3.033397000 |
| 1 | 2.717036000  | -1.297306000 | -3.512503000 |
| 1 | -1.270361000 | -0.369288000 | -2.465673000 |
| 8 | -5.347448000 | -0.745386000 | -0.555498000 |
| 6 | -6.190727000 | -0.574075000 | 0.627222000  |
| 1 | -7.192650000 | -0.847362000 | 0.309032000  |
| 1 | -5.860832000 | -1.231503000 | 1.436296000  |
| 1 | -6.172573000 | 0.465992000  | 0.965146000  |

**Int0\_CpE; Gibbs free energy** ... -1639.32560566 Eh

|    |              |              |              |
|----|--------------|--------------|--------------|
| 45 | 0.729929000  | -0.708590000 | -0.006058000 |
| 8  | 2.094962000  | -1.751351000 | 1.344213000  |
| 6  | 1.655265000  | -1.115978000 | 2.406818000  |
| 6  | -2.333517000 | -0.082412000 | 1.114182000  |
| 6  | 2.177594000  | -1.427317000 | 3.765339000  |
| 8  | 0.741154000  | -0.208319000 | 2.194340000  |
| 6  | -2.750286000 | -1.282186000 | 0.518676000  |
| 6  | -3.237482000 | 0.986645000  | 1.234498000  |
| 6  | 1.901257000  | -0.660713000 | -1.868587000 |
| 6  | 0.490900000  | -0.700901000 | -2.202979000 |
| 6  | -0.129053000 | 0.492668000  | -1.633827000 |
| 6  | 0.892911000  | 1.274744000  | -0.935546000 |
| 6  | 2.141926000  | 0.543742000  | -1.074518000 |
| 6  | -4.074631000 | -1.414033000 | 0.052153000  |

|   |              |              |              |
|---|--------------|--------------|--------------|
| 6 | -4.963540000 | -0.342476000 | 0.175381000  |
| 6 | -4.558841000 | 0.865702000  | 0.767781000  |
| 1 | -5.264431000 | 1.682012000  | 0.863363000  |
| 1 | 1.768583000  | -0.737909000 | 4.499897000  |
| 1 | 1.907627000  | -2.449574000 | 4.037194000  |
| 1 | 3.266853000  | -1.366340000 | 3.767104000  |
| 6 | -1.835997000 | -2.461186000 | 0.416454000  |
| 8 | -2.309363000 | -3.629755000 | 0.268271000  |
| 8 | -0.516784000 | -2.289082000 | 0.527264000  |
| 1 | -4.385768000 | -2.349525000 | -0.396478000 |
| 1 | -5.979522000 | -0.437181000 | -0.188334000 |
| 8 | -2.726794000 | 2.131234000  | 1.843541000  |
| 6 | -3.640665000 | 3.257871000  | 2.033332000  |
| 1 | -4.005053000 | 3.629291000  | 1.071386000  |
| 1 | -4.487123000 | 2.966648000  | 2.660963000  |
| 1 | -3.051957000 | 4.023488000  | 2.530049000  |
| 6 | 0.681097000  | 2.556087000  | -0.213974000 |
| 1 | 0.524694000  | 3.352487000  | -0.947006000 |
| 1 | -0.223816000 | 2.513055000  | 0.395263000  |
| 1 | 1.535607000  | 2.803614000  | 0.409994000  |
| 6 | -0.174939000 | -1.762250000 | -3.003446000 |
| 1 | -0.319974000 | -1.404897000 | -4.027960000 |
| 1 | 0.431002000  | -2.667440000 | -3.041024000 |
| 1 | -1.160330000 | -2.004947000 | -2.607011000 |
| 6 | 2.910081000  | -1.687400000 | -2.230457000 |
| 1 | 2.444947000  | -2.656631000 | -2.411424000 |
| 1 | 3.424319000  | -1.379672000 | -3.146563000 |
| 1 | 3.669172000  | -1.795144000 | -1.455122000 |
| 6 | -1.519250000 | 0.897759000  | -1.911563000 |
| 8 | -2.378315000 | 0.178637000  | -2.462776000 |
| 8 | -1.745668000 | 2.205207000  | -1.567188000 |
| 6 | 3.474275000  | 0.912483000  | -0.555619000 |
| 8 | 4.545031000  | 0.626933000  | -1.130139000 |
| 8 | 3.408897000  | 1.585621000  | 0.633147000  |
| 6 | -3.069202000 | 2.754908000  | -1.928422000 |
| 1 | -3.209434000 | 2.681366000  | -3.006478000 |
| 1 | -3.853796000 | 2.201328000  | -1.409743000 |
| 1 | -3.035691000 | 3.789558000  | -1.603423000 |
| 6 | 4.703284000  | 2.001597000  | 1.222370000  |
| 1 | 4.432165000  | 2.570308000  | 2.104605000  |
| 1 | 5.282236000  | 1.116407000  | 1.482090000  |
| 1 | 5.250016000  | 2.614062000  | 0.506620000  |
| 1 | -1.338556000 | 0.025010000  | 1.533344000  |

Int'0\_CpE; Gibbs free energy ... -1639.32722574 Eh

|    |              |              |              |
|----|--------------|--------------|--------------|
| 45 | 0.979053000  | 0.481383000  | 0.254380000  |
| 8  | 2.443184000  | 2.086835000  | 0.011302000  |
| 6  | 2.203249000  | 2.215082000  | -1.274117000 |
| 6  | -1.887134000 | 0.763484000  | -1.416156000 |
| 6  | 2.885090000  | 3.256161000  | -2.090755000 |
| 8  | 1.327523000  | 1.388799000  | -1.780092000 |
| 6  | -2.419348000 | 1.288234000  | -0.224139000 |
| 6  | -2.706817000 | -0.006478000 | -2.257576000 |

|   |              |              |              |
|---|--------------|--------------|--------------|
| 6 | 1.838180000  | -0.670814000 | 1.918295000  |
| 6 | 0.403530000  | -0.872657000 | 1.914404000  |
| 6 | 0.047227000  | -1.482729000 | 0.638067000  |
| 6 | 1.263152000  | -1.661438000 | -0.161748000 |
| 6 | 2.359332000  | -1.141714000 | 0.633818000  |
| 6 | -3.762358000 | 1.047955000  | 0.125059000  |
| 6 | -4.560394000 | 0.258434000  | -0.714673000 |
| 6 | -4.036579000 | -0.265188000 | -1.913446000 |
| 1 | -4.676446000 | -0.865590000 | -2.548958000 |
| 1 | 2.998869000  | 2.915957000  | -3.118735000 |
| 1 | 2.277906000  | 4.164435000  | -2.098257000 |
| 1 | 3.856703000  | 3.499051000  | -1.664090000 |
| 6 | -1.605487000 | 2.166130000  | 0.671921000  |
| 8 | -2.166831000 | 2.988619000  | 1.458609000  |
| 8 | -0.273228000 | 2.108215000  | 0.600827000  |
| 1 | -4.144225000 | 1.470714000  | 1.047081000  |
| 6 | 1.354374000  | -2.264620000 | -1.516148000 |
| 1 | 1.166268000  | -3.338969000 | -1.437315000 |
| 1 | 0.582606000  | -1.864799000 | -2.175802000 |
| 1 | 2.334783000  | -2.099895000 | -1.955197000 |
| 6 | -0.516322000 | -0.532488000 | 3.031916000  |
| 1 | -0.723364000 | -1.434720000 | 3.616786000  |
| 1 | -0.074426000 | 0.208600000  | 3.698667000  |
| 1 | -1.475219000 | -0.166069000 | 2.666329000  |
| 6 | 2.635763000  | -0.072781000 | 3.018507000  |
| 1 | 2.025636000  | 0.575834000  | 3.647289000  |
| 1 | 3.036928000  | -0.874506000 | 3.646972000  |
| 1 | 3.485883000  | 0.492489000  | 2.635290000  |
| 6 | -1.294003000 | -2.014533000 | 0.336242000  |
| 8 | -2.301509000 | -1.859874000 | 1.057670000  |
| 8 | -1.295112000 | -2.781695000 | -0.799328000 |
| 6 | 3.790848000  | -1.082977000 | 0.275327000  |
| 8 | 4.718566000  | -1.205256000 | 1.100793000  |
| 8 | 3.986230000  | -0.855255000 | -1.058841000 |
| 6 | -2.565150000 | -3.469322000 | -1.116573000 |
| 1 | -2.749662000 | -4.237237000 | -0.365984000 |
| 1 | -3.384041000 | -2.749402000 | -1.127666000 |
| 1 | -2.408237000 | -3.905050000 | -2.097562000 |
| 6 | 5.393485000  | -0.769566000 | -1.513670000 |
| 1 | 5.325375000  | -0.547627000 | -2.572849000 |
| 1 | 5.901468000  | 0.028066000  | -0.972972000 |
| 1 | 5.890029000  | -1.723241000 | -1.339531000 |
| 1 | -0.864755000 | 0.986753000  | -1.702273000 |
| 1 | -2.308576000 | -0.404090000 | -3.183685000 |
| 8 | -5.889274000 | -0.063247000 | -0.450599000 |
| 6 | -6.469735000 | 0.455784000  | 0.788537000  |
| 1 | -5.928468000 | 0.071816000  | 1.657493000  |
| 1 | -6.452055000 | 1.548902000  | 0.794752000  |
| 1 | -7.495341000 | 0.098866000  | 0.796398000  |

**TS0\_CpE**; Gibbs free energy ... -1639.31095764 Eh

|    |              |             |             |
|----|--------------|-------------|-------------|
| 45 | -0.460411000 | 0.276221000 | 0.028713000 |
| 8  | -1.110900000 | 0.722496000 | 2.032200000 |

|   |              |              |              |
|---|--------------|--------------|--------------|
| 6 | -0.480020000 | 1.555086000  | 2.799258000  |
| 6 | 1.375980000  | 1.405508000  | 0.025001000  |
| 6 | -0.985464000 | 1.804987000  | 4.187462000  |
| 8 | 0.600357000  | 2.177045000  | 2.409120000  |
| 6 | 1.218930000  | 2.452298000  | -0.929822000 |
| 6 | 2.664700000  | 0.824509000  | 0.156402000  |
| 6 | 0.275616000  | -1.206194000 | -1.477743000 |
| 6 | -1.005875000 | -0.690106000 | -1.900458000 |
| 6 | -1.994441000 | -1.052602000 | -0.881441000 |
| 6 | -1.326933000 | -1.786303000 | 0.175598000  |
| 6 | 0.083942000  | -1.859602000 | -0.185736000 |
| 6 | 2.291862000  | 2.938613000  | -1.677512000 |
| 6 | 3.559373000  | 2.351039000  | -1.502940000 |
| 6 | 3.757796000  | 1.306965000  | -0.588941000 |
| 1 | 4.742791000  | 0.870850000  | -0.476626000 |
| 1 | -1.960890000 | 1.347466000  | 4.330094000  |
| 1 | -0.279503000 | 1.384947000  | 4.906482000  |
| 1 | -1.043545000 | 2.877573000  | 4.372456000  |
| 1 | 0.938216000  | 1.752857000  | 1.209722000  |
| 6 | -0.166689000 | 2.987551000  | -1.060778000 |
| 8 | -0.453471000 | 4.072255000  | -1.640846000 |
| 8 | -1.104748000 | 2.216349000  | -0.481581000 |
| 1 | 2.136991000  | 3.740531000  | -2.389879000 |
| 6 | -1.952124000 | -2.366264000 | 1.394777000  |
| 1 | -1.244175000 | -2.991738000 | 1.934751000  |
| 1 | -2.298165000 | -1.574008000 | 2.063252000  |
| 1 | -2.832335000 | -2.949027000 | 1.117439000  |
| 6 | -1.255915000 | 0.056068000  | -3.163045000 |
| 1 | -0.332879000 | 0.492178000  | -3.549832000 |
| 1 | -1.651761000 | -0.628318000 | -3.920173000 |
| 1 | -1.997500000 | 0.842314000  | -3.021348000 |
| 6 | 1.532389000  | -1.109057000 | -2.272098000 |
| 1 | 1.528078000  | -1.880428000 | -3.049169000 |
| 1 | 1.614103000  | -0.138320000 | -2.768282000 |
| 1 | 2.413313000  | -1.272849000 | -1.653968000 |
| 6 | -3.416041000 | -0.698461000 | -0.952752000 |
| 8 | -4.001312000 | -0.289451000 | -1.980497000 |
| 8 | -4.051225000 | -0.850908000 | 0.256455000  |
| 6 | 1.079033000  | -2.616183000 | 0.592399000  |
| 8 | 1.035637000  | -2.817879000 | 1.824644000  |
| 8 | 2.051536000  | -3.148016000 | -0.219282000 |
| 6 | -5.486942000 | -0.500508000 | 0.286175000  |
| 1 | -6.031231000 | -1.115372000 | -0.429722000 |
| 1 | -5.798410000 | -0.710041000 | 1.303842000  |
| 1 | -5.609462000 | 0.554766000  | 0.044387000  |
| 6 | 3.023633000  | -4.057057000 | 0.426554000  |
| 1 | 2.515197000  | -4.980356000 | 0.701899000  |
| 1 | 3.781637000  | -4.233096000 | -0.329115000 |
| 1 | 3.448347000  | -3.587695000 | 1.312901000  |
| 8 | 2.753848000  | -0.203980000 | 1.074839000  |
| 6 | 4.084313000  | -0.748489000 | 1.371322000  |
| 1 | 4.496694000  | -1.242417000 | 0.487163000  |
| 1 | 4.754728000  | 0.043728000  | 1.710821000  |

|   |             |              |              |
|---|-------------|--------------|--------------|
| 1 | 3.920697000 | -1.471051000 | 2.166020000  |
| 1 | 4.401039000 | 2.699702000  | -2.088768000 |

TS'0\_CpE; Gibbs free energy ... -1639.30624790 Eh

|    |              |              |              |
|----|--------------|--------------|--------------|
| 45 | 0.923414000  | -0.024367000 | 0.155079000  |
| 8  | 1.960580000  | 1.902785000  | 0.139930000  |
| 6  | 1.339239000  | 2.995311000  | -0.141091000 |
| 6  | -1.048156000 | 0.631294000  | -0.555670000 |
| 6  | 2.058044000  | 4.308790000  | -0.117983000 |
| 8  | 0.064081000  | 3.001589000  | -0.464084000 |
| 6  | -1.941907000 | 0.516101000  | 0.546736000  |
| 6  | -1.602149000 | 0.446328000  | -1.849719000 |
| 6  | 0.625351000  | -2.173893000 | 0.114428000  |
| 6  | 1.693683000  | -1.898655000 | 1.081166000  |
| 6  | 2.777803000  | -1.259555000 | 0.389111000  |
| 6  | 2.407332000  | -1.159607000 | -1.027686000 |
| 6  | 1.113369000  | -1.773787000 | -1.201311000 |
| 6  | -3.308663000 | 0.257665000  | 0.388272000  |
| 6  | -3.813505000 | 0.081057000  | -0.911815000 |
| 6  | -2.959007000 | 0.177127000  | -2.031943000 |
| 1  | -3.380818000 | 0.047112000  | -3.021687000 |
| 1  | 3.109067000  | 4.164920000  | 0.118784000  |
| 1  | 1.960081000  | 4.796959000  | -1.088677000 |
| 1  | 1.601825000  | 4.965315000  | 0.624727000  |
| 1  | -0.362588000 | 1.830782000  | -0.505671000 |
| 6  | -1.355265000 | 0.708532000  | 1.907555000  |
| 8  | -2.064932000 | 0.864862000  | 2.949641000  |
| 8  | -0.020800000 | 0.723640000  | 1.935630000  |
| 1  | -3.938561000 | 0.197675000  | 1.269585000  |
| 6  | 3.269557000  | -0.603775000 | -2.107807000 |
| 1  | 2.677136000  | -0.304929000 | -2.974893000 |
| 1  | 3.836768000  | 0.262428000  | -1.759900000 |
| 1  | 3.991332000  | -1.358344000 | -2.440127000 |
| 6  | 1.624997000  | -2.192733000 | 2.538275000  |
| 1  | 0.594722000  | -2.167595000 | 2.899126000  |
| 1  | 2.021168000  | -3.195262000 | 2.731924000  |
| 1  | 2.214480000  | -1.482462000 | 3.121247000  |
| 6  | -0.652646000 | -2.887949000 | 0.396841000  |
| 1  | -0.527423000 | -3.969065000 | 0.272694000  |
| 1  | -0.989011000 | -2.707138000 | 1.420894000  |
| 1  | -1.442980000 | -2.561321000 | -0.284311000 |
| 1  | -0.966374000 | 0.540491000  | -2.724834000 |
| 8  | -5.145096000 | -0.182780000 | -1.199570000 |
| 6  | -6.070352000 | -0.307124000 | -0.070296000 |
| 1  | -5.791098000 | -1.154987000 | 0.560057000  |
| 1  | -6.080854000 | 0.610756000  | 0.522457000  |
| 1  | -7.044996000 | -0.474804000 | -0.518339000 |
| 6  | 0.432194000  | -2.031846000 | -2.499807000 |
| 1  | -0.649073000 | -2.118327000 | -2.378764000 |
| 1  | 0.638776000  | -1.250345000 | -3.234020000 |
| 1  | 0.798880000  | -2.978000000 | -2.913355000 |
| 6  | 4.065175000  | -0.795587000 | 0.979414000  |
| 1  | 4.409001000  | 0.128801000  | 0.509478000  |

|   |             |              |             |
|---|-------------|--------------|-------------|
| 1 | 3.973911000 | -0.621847000 | 2.053475000 |
| 1 | 4.844717000 | -1.550356000 | 0.828642000 |

**Int1\_CpE**; Gibbs free energy ... -1639.32544167 Eh

|    |              |              |              |
|----|--------------|--------------|--------------|
| 45 | -0.113519000 | -0.478024000 | 0.571723000  |
| 8  | 1.040893000  | 0.032001000  | 2.321804000  |
| 6  | 2.113365000  | 0.714361000  | 2.381023000  |
| 6  | -0.770475000 | 1.428457000  | 0.323439000  |
| 6  | 3.005979000  | 0.654252000  | 3.573534000  |
| 8  | 2.554782000  | 1.506550000  | 1.401013000  |
| 6  | -2.070007000 | 1.661165000  | 0.808615000  |
| 6  | -0.123438000 | 2.475123000  | -0.346676000 |
| 6  | 1.068410000  | -2.433572000 | 0.005374000  |
| 6  | -0.310060000 | -2.716629000 | -0.080010000 |
| 6  | -0.912311000 | -1.718132000 | -0.987086000 |
| 6  | 0.145013000  | -0.908084000 | -1.586918000 |
| 6  | 1.358879000  | -1.291314000 | -0.893546000 |
| 6  | -2.738201000 | 2.876496000  | 0.573110000  |
| 6  | -2.090065000 | 3.880526000  | -0.155128000 |
| 6  | -0.770396000 | 3.692592000  | -0.608449000 |
| 1  | -0.266556000 | 4.488769000  | -1.143964000 |
| 1  | 3.326119000  | 1.654894000  | 3.859962000  |
| 1  | 2.501966000  | 0.161855000  | 4.399728000  |
| 1  | 3.900309000  | 0.083381000  | 3.310334000  |
| 1  | 1.971429000  | 1.642277000  | 0.565558000  |
| 6  | -2.656517000 | 0.564611000  | 1.612609000  |
| 8  | -3.802510000 | 0.594466000  | 2.147895000  |
| 8  | -1.832773000 | -0.492056000 | 1.769202000  |
| 1  | -3.741515000 | 3.015197000  | 0.962150000  |
| 1  | -2.589700000 | 4.819247000  | -0.360033000 |
| 8  | 1.227246000  | 2.226687000  | -0.691850000 |
| 6  | 1.948855000  | 3.263325000  | -1.440213000 |
| 1  | 1.472924000  | 3.414176000  | -2.410827000 |
| 1  | 1.970718000  | 4.195681000  | -0.872330000 |
| 1  | 2.955694000  | 2.876099000  | -1.568358000 |
| 6  | -0.003655000 | 0.056752000  | -2.712602000 |
| 1  | 0.197899000  | -0.465489000 | -3.654018000 |
| 1  | -1.014535000 | 0.459155000  | -2.749197000 |
| 1  | 0.720278000  | 0.863385000  | -2.624659000 |
| 6  | -1.063880000 | -3.757225000 | 0.676960000  |
| 1  | -1.299229000 | -4.604866000 | 0.026939000  |
| 1  | -0.485629000 | -4.123962000 | 1.525945000  |
| 1  | -2.013696000 | -3.364868000 | 1.045857000  |
| 6  | 2.065654000  | -3.139469000 | 0.860764000  |
| 1  | 1.586463000  | -3.912558000 | 1.462243000  |
| 1  | 2.832719000  | -3.609770000 | 0.239014000  |
| 1  | 2.585473000  | -2.445819000 | 1.525083000  |
| 6  | -2.351682000 | -1.687691000 | -1.309113000 |
| 8  | -3.110158000 | -2.679165000 | -1.263442000 |
| 8  | -2.786091000 | -0.426051000 | -1.625643000 |
| 6  | 2.721526000  | -0.791652000 | -1.114851000 |
| 8  | 3.691275000  | -1.010650000 | -0.351968000 |
| 8  | 2.850052000  | -0.063752000 | -2.274203000 |

|   |              |              |              |
|---|--------------|--------------|--------------|
| 6 | -4.231745000 | -0.272134000 | -1.891326000 |
| 1 | -4.513019000 | -0.861053000 | -2.763662000 |
| 1 | -4.799342000 | -0.596015000 | -1.018688000 |
| 1 | -4.364234000 | 0.789888000  | -2.071521000 |
| 6 | 4.204379000  | 0.464043000  | -2.544876000 |
| 1 | 4.088831000  | 1.087275000  | -3.425839000 |
| 1 | 4.549172000  | 1.044748000  | -1.688257000 |
| 1 | 4.888409000  | -0.363046000 | -2.732154000 |

**Int'1\_CpE; Gibbs free energy** ... -1639.31404041 Eh

|    |              |              |              |
|----|--------------|--------------|--------------|
| 45 | -0.636063000 | 0.161729000  | 0.547728000  |
| 8  | -0.306175000 | -1.478055000 | 1.935794000  |
| 6  | -0.037642000 | -2.689942000 | 1.685008000  |
| 6  | 1.230876000  | -0.250244000 | -0.146351000 |
| 6  | 0.408550000  | -3.645624000 | 2.733970000  |
| 8  | -0.113425000 | -3.224076000 | 0.450667000  |
| 6  | 2.262014000  | 0.299891000  | 0.641097000  |
| 6  | 1.579259000  | -1.022614000 | -1.270470000 |
| 6  | -3.031585000 | 0.302972000  | 0.414395000  |
| 6  | -2.518273000 | 1.603240000  | 0.569306000  |
| 6  | -1.511287000 | 1.813463000  | -0.498233000 |
| 6  | -1.510527000 | 0.658886000  | -1.396211000 |
| 6  | -2.363449000 | -0.313812000 | -0.746458000 |
| 6  | 3.619762000  | 0.098847000  | 0.332033000  |
| 6  | 3.945368000  | -0.671587000 | -0.792708000 |
| 6  | 2.926970000  | -1.231649000 | -1.591327000 |
| 1  | 3.205619000  | -1.826008000 | -2.453903000 |
| 1  | 1.449792000  | -3.916498000 | 2.547400000  |
| 1  | 0.323467000  | -3.191815000 | 3.716320000  |
| 1  | -0.181603000 | -4.560232000 | 2.686958000  |
| 1  | -0.458853000 | -2.616033000 | -0.265878000 |
| 6  | 1.844723000  | 1.101773000  | 1.815866000  |
| 8  | 2.643521000  | 1.656383000  | 2.627320000  |
| 8  | 0.511164000  | 1.198800000  | 1.960119000  |
| 1  | 4.372377000  | 0.544789000  | 0.974076000  |
| 6  | -0.909178000 | 0.544274000  | -2.755145000 |
| 1  | -1.498448000 | 1.150038000  | -3.451067000 |
| 1  | 0.110091000  | 0.924493000  | -2.777303000 |
| 1  | -0.920924000 | -0.489058000 | -3.102196000 |
| 6  | -2.852811000 | 2.570897000  | 1.652408000  |
| 1  | -3.443075000 | 3.399592000  | 1.250821000  |
| 1  | -3.427627000 | 2.089725000  | 2.445120000  |
| 1  | -1.950465000 | 3.008498000  | 2.083605000  |
| 6  | -4.021864000 | -0.399392000 | 1.279553000  |
| 1  | -4.126644000 | 0.088479000  | 2.249320000  |
| 1  | -5.003382000 | -0.409558000 | 0.795305000  |
| 1  | -3.736590000 | -1.441643000 | 1.445536000  |
| 6  | -0.750640000 | 3.063572000  | -0.667421000 |
| 8  | -0.971561000 | 4.124557000  | -0.045333000 |
| 8  | 0.271893000  | 2.930763000  | -1.574620000 |
| 6  | -2.725303000 | -1.627475000 | -1.294248000 |
| 8  | -3.876929000 | -2.083381000 | -1.396979000 |
| 8  | -1.597999000 | -2.343631000 | -1.683671000 |

|   |              |              |              |
|---|--------------|--------------|--------------|
| 6 | 1.152956000  | 4.105624000  | -1.743216000 |
| 1 | 0.564606000  | 4.970735000  | -2.046513000 |
| 1 | 1.663539000  | 4.309590000  | -0.801796000 |
| 1 | 1.855576000  | 3.813403000  | -2.516366000 |
| 6 | -1.839670000 | -3.640421000 | -2.366232000 |
| 1 | -0.850146000 | -4.061154000 | -2.514846000 |
| 1 | -2.451458000 | -4.276369000 | -1.727950000 |
| 1 | -2.338914000 | -3.453874000 | -3.315078000 |
| 1 | 0.815671000  | -1.469427000 | -1.901703000 |
| 8 | 5.251240000  | -0.943845000 | -1.205014000 |
| 6 | 6.331404000  | -0.387917000 | -0.390153000 |
| 1 | 6.284271000  | 0.704588000  | -0.379982000 |
| 1 | 6.277249000  | -0.769167000 | 0.633485000  |
| 1 | 7.250174000  | -0.719177000 | -0.865134000 |

**Int2\_T\_CpE; Gibbs free energy** ... -1949.48525046 Eh

|    |              |              |              |
|----|--------------|--------------|--------------|
| 45 | 0.066551000  | -0.444257000 | -0.030375000 |
| 6  | -1.829335000 | -0.123179000 | 0.618705000  |
| 6  | -2.129948000 | -0.686498000 | 1.867780000  |
| 6  | -2.845845000 | 0.520578000  | -0.112829000 |
| 6  | 0.592097000  | -0.503393000 | -2.263403000 |
| 6  | 1.714599000  | -1.131562000 | -1.545228000 |
| 6  | 1.243177000  | -2.281807000 | -0.849612000 |
| 6  | -0.203231000 | -2.355656000 | -1.098705000 |
| 6  | -0.567844000 | -1.334476000 | -2.072365000 |
| 6  | -3.439133000 | -0.655673000 | 2.388453000  |
| 6  | -4.449893000 | -0.050349000 | 1.636572000  |
| 6  | -4.160543000 | 0.541530000  | 0.391630000  |
| 1  | -3.633648000 | -1.100815000 | 3.358524000  |
| 1  | -4.954856000 | 1.026937000  | -0.164299000 |
| 6  | -0.988418000 | -1.275153000 | 2.604019000  |
| 8  | -1.071513000 | -1.827071000 | 3.740081000  |
| 8  | 0.189536000  | -1.162247000 | 1.960192000  |
| 6  | 0.257733000  | 1.858287000  | 0.410457000  |
| 6  | 1.293345000  | 1.204904000  | 0.724868000  |
| 6  | -1.079299000 | -3.365601000 | -0.487460000 |
| 8  | -0.701236000 | -4.266829000 | 0.294443000  |
| 8  | -2.399196000 | -3.186160000 | -0.825968000 |
| 6  | -3.366621000 | -4.085373000 | -0.163973000 |
| 1  | -3.178421000 | -5.115603000 | -0.464383000 |
| 1  | -3.274204000 | -3.987967000 | 0.918369000  |
| 1  | -4.336918000 | -3.742448000 | -0.508324000 |
| 6  | 3.116306000  | -0.693149000 | -1.564490000 |
| 8  | 4.104024000  | -1.428323000 | -1.337476000 |
| 8  | 3.243147000  | 0.636526000  | -1.884622000 |
| 6  | 2.014960000  | -3.192923000 | 0.039379000  |
| 1  | 1.997322000  | -4.208560000 | -0.366158000 |
| 1  | 3.049997000  | -2.869055000 | 0.131912000  |
| 1  | 1.546362000  | -3.245308000 | 1.026538000  |
| 6  | -1.837524000 | -1.262414000 | -2.849492000 |
| 1  | -1.868941000 | -0.374550000 | -3.479187000 |
| 1  | -1.893673000 | -2.148461000 | -3.491454000 |
| 1  | -2.717435000 | -1.276278000 | -2.209667000 |



|   |              |              |              |
|---|--------------|--------------|--------------|
| 6 | 0.672437000  | 0.671191000  | -3.179240000 |
| 1 | 1.183974000  | 1.506307000  | -2.700760000 |
| 1 | 1.246464000  | 0.414244000  | -4.075514000 |
| 1 | -0.322535000 | 0.995452000  | -3.487344000 |
| 6 | 4.624658000  | 1.158091000  | -1.935571000 |
| 1 | 5.176990000  | 0.653290000  | -2.727733000 |
| 1 | 4.512102000  | 2.217055000  | -2.143826000 |
| 1 | 5.111683000  | 0.996366000  | -0.972882000 |
| 6 | -0.688477000 | 2.925702000  | 0.279787000  |
| 6 | -1.709680000 | 3.098841000  | 1.244034000  |
| 6 | -0.571237000 | 3.852247000  | -0.783245000 |
| 6 | -2.595685000 | 4.177133000  | 1.140903000  |
| 6 | -1.457603000 | 4.930985000  | -0.873830000 |
| 6 | -2.473109000 | 5.096355000  | 0.084779000  |
| 1 | -1.799803000 | 2.388027000  | 2.058371000  |
| 1 | 0.209896000  | 3.717573000  | -1.522968000 |
| 1 | -3.374027000 | 4.303422000  | 1.883963000  |
| 1 | -1.357370000 | 5.640951000  | -1.685928000 |
| 1 | -3.158933000 | 5.931705000  | 0.010016000  |
| 6 | 2.632156000  | 1.061227000  | 1.238987000  |
| 6 | 3.462409000  | 2.208170000  | 1.291860000  |
| 6 | 3.128804000  | -0.176906000 | 1.696871000  |
| 6 | 4.761251000  | 2.108279000  | 1.802399000  |
| 6 | 4.430682000  | -0.268254000 | 2.203338000  |
| 6 | 5.250997000  | 0.871205000  | 2.258918000  |
| 1 | 3.083578000  | 3.157140000  | 0.928469000  |
| 1 | 2.476691000  | -1.043361000 | 1.677422000  |
| 1 | 5.391144000  | 2.989115000  | 1.836692000  |
| 1 | 4.803298000  | -1.222643000 | 2.556244000  |
| 1 | 6.257729000  | 0.796591000  | 2.652055000  |
| 1 | -5.466775000 | -0.019980000 | 2.008960000  |
| 8 | -2.460229000 | 1.127671000  | -1.301730000 |
| 6 | -3.472990000 | 1.872887000  | -2.040977000 |
| 1 | -2.948212000 | 2.303651000  | -2.890753000 |
| 1 | -4.270596000 | 1.208774000  | -2.389423000 |
| 1 | -3.894340000 | 2.669747000  | -1.419210000 |

Int'2\_T\_CpE; Gibbs free energy ... -1949.48307778 Eh

|    |              |              |              |
|----|--------------|--------------|--------------|
| 45 | 0.311899000  | -0.366295000 | -0.010120000 |
| 6  | -1.661979000 | -0.048917000 | 0.419125000  |
| 6  | -1.982625000 | -0.141030000 | 1.789953000  |
| 6  | -2.681856000 | 0.201583000  | -0.504182000 |
| 6  | 1.393140000  | -0.806382000 | -1.987827000 |
| 6  | 2.153110000  | -1.494204000 | -0.950659000 |
| 6  | 1.294794000  | -2.450756000 | -0.308211000 |
| 6  | -0.012522000 | -2.357018000 | -0.950852000 |
| 6  | 0.065525000  | -1.377774000 | -2.031110000 |
| 6  | -3.302601000 | 0.007117000  | 2.234836000  |
| 6  | -4.319488000 | 0.246273000  | 1.298294000  |
| 6  | -4.012661000 | 0.342581000  | -0.073462000 |
| 1  | -3.531150000 | -0.058556000 | 3.293619000  |
| 1  | -4.785574000 | 0.536739000  | -0.807977000 |
| 6  | -0.857942000 | -0.388603000 | 2.719213000  |

|   |              |              |              |
|---|--------------|--------------|--------------|
| 8 | -0.970213000 | -0.493652000 | 3.975862000  |
| 8 | 0.330996000  | -0.497152000 | 2.102914000  |
| 6 | 0.283023000  | 1.960229000  | -0.201499000 |
| 6 | 1.334997000  | 1.560309000  | 0.370641000  |
| 6 | -1.187202000 | -3.141901000 | -0.532129000 |
| 8 | -1.342553000 | -3.661280000 | 0.595931000  |
| 8 | -2.135830000 | -3.231764000 | -1.519761000 |
| 6 | -3.387800000 | -3.926031000 | -1.148829000 |
| 1 | -3.165726000 | -4.953152000 | -0.862029000 |
| 1 | -3.864738000 | -3.399859000 | -0.320817000 |
| 1 | -3.999619000 | -3.890505000 | -2.043709000 |
| 6 | 3.568726000  | -1.327184000 | -0.623175000 |
| 8 | 4.207903000  | -2.016049000 | 0.206364000  |
| 8 | 4.157316000  | -0.318952000 | -1.353045000 |
| 6 | 1.675155000  | -3.359899000 | 0.807099000  |
| 1 | 0.838926000  | -3.986665000 | 1.106386000  |
| 1 | 2.520409000  | -3.980146000 | 0.499096000  |
| 1 | 2.016202000  | -2.785443000 | 1.672992000  |
| 6 | -0.933368000 | -1.074676000 | -3.097203000 |
| 1 | -0.938405000 | -0.009544000 | -3.345563000 |
| 1 | -0.662745000 | -1.621793000 | -4.006906000 |
| 1 | -1.937315000 | -1.381833000 | -2.817366000 |
| 6 | 1.896105000  | 0.226896000  | -2.937109000 |
| 1 | 2.365924000  | 1.062593000  | -2.415037000 |
| 1 | 2.664719000  | -0.208603000 | -3.581822000 |
| 1 | 1.091875000  | 0.603524000  | -3.569610000 |
| 6 | 5.588772000  | -0.081892000 | -1.084541000 |
| 1 | 6.169090000  | -0.953118000 | -1.387867000 |
| 1 | 5.843501000  | 0.789086000  | -1.680214000 |
| 1 | 5.736243000  | 0.111572000  | -0.020671000 |
| 1 | -2.465488000 | 0.325697000  | -1.559226000 |
| 8 | -5.606987000 | 0.381306000  | 1.821247000  |
| 6 | -6.681044000 | 0.698599000  | 0.881574000  |
| 1 | -6.494131000 | 1.658590000  | 0.391216000  |
| 1 | -6.786807000 | -0.087403000 | 0.128621000  |
| 1 | -7.581058000 | 0.754996000  | 1.487009000  |
| 6 | -0.811653000 | 2.732427000  | -0.707585000 |
| 6 | -1.756413000 | 3.282711000  | 0.191910000  |
| 6 | -0.977253000 | 2.929393000  | -2.097561000 |
| 6 | -2.838061000 | 4.023099000  | -0.294822000 |
| 6 | -2.064692000 | 3.669149000  | -2.576147000 |
| 6 | -2.998747000 | 4.215603000  | -1.678316000 |
| 1 | -1.635811000 | 3.113689000  | 1.256260000  |
| 1 | -0.256913000 | 2.504347000  | -2.787783000 |
| 1 | -3.557464000 | 4.439792000  | 0.399727000  |
| 1 | -2.185343000 | 3.816656000  | -3.642311000 |
| 1 | -3.842162000 | 4.784184000  | -2.050957000 |
| 6 | 2.656614000  | 1.686418000  | 0.930724000  |
| 6 | 3.442680000  | 2.803869000  | 0.554022000  |
| 6 | 3.182702000  | 0.739987000  | 1.836418000  |
| 6 | 4.721655000  | 2.974880000  | 1.096028000  |
| 6 | 4.463514000  | 0.920709000  | 2.373072000  |
| 6 | 5.234616000  | 2.038953000  | 2.011397000  |

|   |             |              |              |
|---|-------------|--------------|--------------|
| 1 | 3.043357000 | 3.521939000  | -0.153275000 |
| 1 | 2.574728000 | -0.113417000 | 2.118619000  |
| 1 | 5.315258000 | 3.833932000  | 0.807281000  |
| 1 | 4.859102000 | 0.192685000  | 3.071152000  |
| 1 | 6.223661000 | 2.175730000  | 2.431702000  |

**Int2\_H\_CpE**; Gibbs free energy ... -1644.75024444 Eh

|    |              |              |              |
|----|--------------|--------------|--------------|
| 45 | -0.342906000 | 0.096589000  | -0.087507000 |
| 6  | 1.277529000  | 1.104911000  | -0.786010000 |
| 6  | 1.021932000  | 1.977237000  | -1.859016000 |
| 6  | 2.597087000  | 0.997760000  | -0.304557000 |
| 6  | -1.367952000 | -1.565296000 | 1.197552000  |
| 6  | -1.727210000 | -1.736297000 | -0.179324000 |
| 6  | -0.504980000 | -1.965777000 | -0.963941000 |
| 6  | 0.592718000  | -1.979561000 | -0.020143000 |
| 6  | 0.083124000  | -1.687819000 | 1.298251000  |
| 6  | 2.047566000  | 2.742872000  | -2.448816000 |
| 6  | 3.347534000  | 2.634710000  | -1.949814000 |
| 6  | 3.627957000  | 1.762415000  | -0.880863000 |
| 1  | 1.805956000  | 3.396683000  | -3.280337000 |
| 1  | 4.641739000  | 1.686835000  | -0.504388000 |
| 1  | 4.152521000  | 3.215190000  | -2.384151000 |
| 6  | -0.375403000 | 2.016459000  | -2.342764000 |
| 8  | -0.793123000 | 2.744676000  | -3.292199000 |
| 8  | -1.195854000 | 1.180063000  | -1.684233000 |
| 6  | -0.191035000 | 1.698581000  | 1.553703000  |
| 6  | -1.366344000 | 1.702574000  | 1.103359000  |
| 6  | -2.791658000 | 1.986737000  | 0.864487000  |
| 1  | -2.899470000 | 2.440992000  | -0.125435000 |
| 1  | -3.349331000 | 1.043095000  | 0.831406000  |
| 6  | 0.977319000  | 2.045105000  | 2.384217000  |
| 1  | 1.688944000  | 2.623128000  | 1.783035000  |
| 1  | 1.503410000  | 1.136157000  | 2.689089000  |
| 6  | -3.368861000 | 2.907924000  | 1.954242000  |
| 1  | -3.311855000 | 2.430495000  | 2.936335000  |
| 1  | -2.820203000 | 3.851672000  | 2.000177000  |
| 1  | -4.416300000 | 3.126063000  | 1.736410000  |
| 6  | 0.544621000  | 2.850846000  | 3.622529000  |
| 1  | -0.112601000 | 2.253733000  | 4.260704000  |
| 1  | 1.423287000  | 3.135989000  | 4.204592000  |
| 1  | 0.009141000  | 3.758827000  | 3.334327000  |
| 8  | 2.803967000  | 0.100907000  | 0.745421000  |
| 6  | 4.111981000  | 0.114537000  | 1.396715000  |
| 1  | 4.903459000  | -0.172272000 | 0.697890000  |
| 1  | 4.322274000  | 1.105337000  | 1.811040000  |
| 1  | 4.038989000  | -0.620285000 | 2.196100000  |
| 6  | 1.982314000  | -2.308998000 | -0.380038000 |
| 8  | 2.513019000  | -2.129625000 | -1.497446000 |
| 8  | 2.628971000  | -2.936473000 | 0.657539000  |
| 6  | 4.007455000  | -3.386106000 | 0.374169000  |
| 1  | 3.984170000  | -4.164724000 | -0.387948000 |
| 1  | 4.607650000  | -2.545030000 | 0.027868000  |
| 1  | 4.375593000  | -3.770507000 | 1.319662000  |

|   |              |              |              |
|---|--------------|--------------|--------------|
| 6 | -3.059883000 | -1.680384000 | -0.791683000 |
| 8 | -3.341672000 | -2.106820000 | -1.933964000 |
| 8 | -3.996916000 | -1.084959000 | 0.022470000  |
| 6 | -0.433672000 | -2.268087000 | -2.422617000 |
| 1 | 0.590313000  | -2.181076000 | -2.782068000 |
| 1 | -0.791984000 | -3.285331000 | -2.609530000 |
| 1 | -1.078562000 | -1.598640000 | -2.993592000 |
| 6 | 0.824258000  | -1.634389000 | 2.588921000  |
| 1 | 0.288851000  | -1.016579000 | 3.314644000  |
| 1 | 0.923456000  | -2.640511000 | 3.009412000  |
| 1 | 1.826888000  | -1.233486000 | 2.446924000  |
| 6 | -2.234216000 | -1.314627000 | 2.386111000  |
| 1 | -3.288331000 | -1.308595000 | 2.123315000  |
| 1 | -2.054074000 | -2.082735000 | 3.144092000  |
| 1 | -1.989721000 | -0.348784000 | 2.846947000  |
| 6 | -5.363579000 | -0.970699000 | -0.526785000 |
| 1 | -5.768869000 | -1.963598000 | -0.718044000 |
| 1 | -5.925324000 | -0.458559000 | 0.247754000  |
| 1 | -5.341507000 | -0.388517000 | -1.447585000 |

**Int'2\_H\_CpE; Gibbs free energy** ... -1644.74333695 Eh

|    |              |              |              |
|----|--------------|--------------|--------------|
| 45 | 0.471011000  | -0.057147000 | -0.052856000 |
| 6  | -1.521588000 | -0.452658000 | -0.173920000 |
| 6  | -1.903873000 | -1.179925000 | -1.323185000 |
| 6  | -2.509169000 | -0.021105000 | 0.718172000  |
| 6  | 2.076543000  | 1.133072000  | 1.129991000  |
| 6  | 2.343315000  | 1.321099000  | -0.272669000 |
| 6  | 1.179105000  | 1.960382000  | -0.884429000 |
| 6  | 0.215876000  | 2.186971000  | 0.170118000  |
| 6  | 0.746342000  | 1.654571000  | 1.413568000  |
| 6  | -3.248508000 | -1.484388000 | -1.572184000 |
| 6  | -4.229776000 | -1.048129000 | -0.669673000 |
| 6  | -3.864434000 | -0.310139000 | 0.474139000  |
| 1  | -3.523814000 | -2.045963000 | -2.458853000 |
| 1  | -4.612411000 | 0.043729000  | 1.174144000  |
| 6  | -0.821207000 | -1.558699000 | -2.259960000 |
| 8  | -0.989451000 | -2.232331000 | -3.319962000 |
| 8  | 0.385670000  | -1.100963000 | -1.892925000 |
| 6  | 0.330923000  | -1.784696000 | 1.424261000  |
| 6  | 1.265439000  | -2.042358000 | 0.621252000  |
| 6  | 2.403512000  | -2.662804000 | -0.076739000 |
| 1  | 2.058918000  | -3.046875000 | -1.041484000 |
| 1  | 3.158970000  | -1.898716000 | -0.293665000 |
| 6  | -0.595187000 | -1.908178000 | 2.565211000  |
| 1  | -1.561820000 | -2.276499000 | 2.205716000  |
| 1  | -0.785428000 | -0.922813000 | 3.003882000  |
| 6  | 3.027128000  | -3.788728000 | 0.768327000  |
| 1  | 3.405912000  | -3.398202000 | 1.717013000  |
| 1  | 2.292133000  | -4.567033000 | 0.986130000  |
| 1  | 3.858872000  | -4.240297000 | 0.223916000  |
| 6  | -0.020904000 | -2.859433000 | 3.630539000  |
| 1  | 0.923346000  | -2.476346000 | 4.026549000  |
| 1  | -0.727960000 | -2.960238000 | 4.456279000  |

|   |              |              |              |
|---|--------------|--------------|--------------|
| 1 | 0.161473000  | -3.850610000 | 3.207925000  |
| 6 | -1.098993000 | 2.821801000  | -0.016730000 |
| 8 | -1.653114000 | 3.069590000  | -1.110421000 |
| 8 | -1.685020000 | 3.121634000  | 1.189308000  |
| 6 | -3.032780000 | 3.725202000  | 1.122240000  |
| 1 | -2.963138000 | 4.717049000  | 0.676964000  |
| 1 | -3.687910000 | 3.090863000  | 0.524812000  |
| 1 | -3.362801000 | 3.776918000  | 2.154436000  |
| 6 | 3.538023000  | 0.955370000  | -1.037413000 |
| 8 | 3.769275000  | 1.295779000  | -2.220259000 |
| 8 | 4.414083000  | 0.164116000  | -0.323001000 |
| 6 | 1.050290000  | 2.354246000  | -2.316000000 |
| 1 | 0.021086000  | 2.606914000  | -2.559905000 |
| 1 | 1.685853000  | 3.223467000  | -2.513456000 |
| 1 | 1.404511000  | 1.558846000  | -2.972512000 |
| 6 | 0.188211000  | 1.749890000  | 2.794362000  |
| 1 | 0.690279000  | 1.047164000  | 3.462939000  |
| 1 | 0.341214000  | 2.759472000  | 3.189052000  |
| 1 | -0.885561000 | 1.564557000  | 2.824317000  |
| 6 | 2.948188000  | 0.555340000  | 2.193777000  |
| 1 | 3.862521000  | 0.134608000  | 1.786705000  |
| 1 | 3.203506000  | 1.337820000  | 2.916161000  |
| 1 | 2.417226000  | -0.226510000 | 2.747245000  |
| 6 | 5.628969000  | -0.273069000 | -1.039711000 |
| 1 | 6.209862000  | 0.595492000  | -1.347595000 |
| 1 | 6.172293000  | -0.872985000 | -0.316645000 |
| 1 | 5.348029000  | -0.865228000 | -1.910715000 |
| 1 | -2.251693000 | 0.542351000  | 1.610756000  |
| 8 | -5.546784000 | -1.386914000 | -0.988622000 |
| 6 | -6.590378000 | -0.945959000 | -0.064437000 |
| 1 | -6.435994000 | -1.376770000 | 0.928876000  |
| 1 | -6.611350000 | 0.145308000  | 0.004813000  |
| 1 | -7.521779000 | -1.311331000 | -0.487246000 |

**TS2\_T\_CpE; Gibbs free energy** ... -1949.46297632 Eh

|    |              |              |              |
|----|--------------|--------------|--------------|
| 45 | 0.459745000  | -0.509209000 | 0.400158000  |
| 6  | -1.420490000 | -0.227347000 | 1.296849000  |
| 6  | -1.314723000 | -0.103232000 | 2.703874000  |
| 6  | -2.637488000 | -0.711288000 | 0.754175000  |
| 6  | 1.629207000  | -1.159435000 | -1.444334000 |
| 6  | 2.299606000  | -1.609340000 | -0.253875000 |
| 6  | 1.426123000  | -2.572522000 | 0.457307000  |
| 6  | 0.228723000  | -2.714619000 | -0.298546000 |
| 6  | 0.312661000  | -1.789598000 | -1.427239000 |
| 6  | 2.151423000  | -0.238810000 | -2.496102000 |
| 6  | -2.398082000 | -0.404712000 | 3.544642000  |
| 6  | -3.591797000 | -0.877073000 | 2.984006000  |
| 6  | -3.711946000 | -1.043068000 | 1.592067000  |
| 6  | 1.761965000  | -3.307181000 | 1.710619000  |
| 6  | -0.919181000 | -3.603142000 | 0.050154000  |
| 1  | -0.794757000 | -4.582998000 | -0.421255000 |
| 1  | -2.280304000 | -0.293243000 | 4.616780000  |
| 1  | -4.636533000 | -1.424208000 | 1.174797000  |

|   |              |              |              |
|---|--------------|--------------|--------------|
| 1 | 0.872698000  | -3.775855000 | 2.135802000  |
| 1 | -1.863628000 | -3.189856000 | -0.304575000 |
| 1 | 1.338233000  | 0.147409000  | -3.109758000 |
| 1 | 2.496363000  | -4.093006000 | 1.505496000  |
| 1 | -0.984107000 | -3.756370000 | 1.130659000  |
| 1 | 2.702815000  | 0.593613000  | -2.054390000 |
| 1 | 2.204257000  | -2.644336000 | 2.454208000  |
| 1 | 2.854234000  | -0.778337000 | -3.137766000 |
| 6 | 0.018198000  | 0.265960000  | 3.238049000  |
| 8 | 0.226539000  | 0.644694000  | 4.428678000  |
| 8 | 1.013701000  | 0.132633000  | 2.349102000  |
| 6 | -0.883306000 | 1.406502000  | 0.276225000  |
| 6 | 0.400124000  | 1.530880000  | 0.094515000  |
| 6 | -0.659178000 | -1.645301000 | -2.525746000 |
| 6 | 3.650194000  | -1.255295000 | 0.195602000  |
| 6 | -2.238104000 | -2.844526000 | -3.923688000 |
| 1 | -1.633110000 | -2.849197000 | -4.829903000 |
| 1 | -2.802454000 | -3.765645000 | -3.823429000 |
| 1 | -2.892280000 | -1.973730000 | -3.921485000 |
| 6 | 5.763213000  | -0.251165000 | -0.420184000 |
| 1 | 6.155149000  | 0.245596000  | -1.301721000 |
| 1 | 5.718125000  | 0.428564000  | 0.431007000  |
| 1 | 6.355604000  | -1.129032000 | -0.164062000 |
| 8 | -0.820555000 | -0.624480000 | -3.228465000 |
| 8 | 4.107029000  | -1.460547000 | 1.343404000  |
| 8 | -1.342581000 | -2.817434000 | -2.747698000 |
| 8 | 4.397082000  | -0.666962000 | -0.799514000 |
| 6 | 1.495525000  | 2.406380000  | -0.251135000 |
| 6 | 1.304734000  | 3.456262000  | -1.181699000 |
| 6 | 2.777674000  | 2.203980000  | 0.309340000  |
| 6 | 2.378298000  | 4.280445000  | -1.541081000 |
| 6 | 3.842914000  | 3.038780000  | -0.046949000 |
| 6 | 3.649173000  | 4.074923000  | -0.976788000 |
| 1 | 0.326176000  | 3.608941000  | -1.623820000 |
| 1 | 2.912705000  | 1.405144000  | 1.034132000  |
| 1 | 2.226466000  | 5.073953000  | -2.262924000 |
| 1 | 4.820018000  | 2.885059000  | 0.395296000  |
| 1 | 4.479490000  | 4.710819000  | -1.259447000 |
| 6 | -2.144871000 | 2.058835000  | -0.067073000 |
| 6 | -3.131335000 | 2.315004000  | 0.909350000  |
| 6 | -2.347063000 | 2.503696000  | -1.393057000 |
| 6 | -4.291869000 | 3.018831000  | 0.569159000  |
| 6 | -3.514151000 | 3.201867000  | -1.729725000 |
| 6 | -4.487939000 | 3.461653000  | -0.751136000 |
| 1 | -2.975841000 | 1.973109000  | 1.928062000  |
| 1 | -1.597917000 | 2.287332000  | -2.147897000 |
| 1 | -5.040318000 | 3.217864000  | 1.326550000  |
| 1 | -3.664784000 | 3.536542000  | -2.748945000 |
| 1 | -5.388586000 | 4.003251000  | -1.014094000 |
| 1 | -4.431364000 | -1.130698000 | 3.619271000  |
| 8 | -2.682131000 | -0.795989000 | -0.629713000 |
| 6 | -3.993016000 | -0.979490000 | -1.253455000 |
| 1 | -3.836240000 | -0.767233000 | -2.308663000 |

|   |              |              |              |
|---|--------------|--------------|--------------|
| 1 | -4.342208000 | -2.007071000 | -1.117895000 |
| 1 | -4.718514000 | -0.274590000 | -0.836924000 |

TS'2\_T\_CpE; Gibbs free energy ... -1949.46043088 Eh

|    |              |              |              |
|----|--------------|--------------|--------------|
| 45 | -0.449526000 | -0.593428000 | -0.239030000 |
| 6  | 1.561477000  | -0.172552000 | -0.679110000 |
| 6  | 1.812888000  | -0.305354000 | -2.071181000 |
| 6  | 2.627708000  | -0.373268000 | 0.221369000  |
| 6  | -1.804203000 | -1.000813000 | 1.526402000  |
| 6  | -2.310956000 | -1.730100000 | 0.394192000  |
| 6  | -1.298593000 | -2.722736000 | -0.024005000 |
| 6  | -0.193619000 | -2.638387000 | 0.869840000  |
| 6  | -0.461138000 | -1.522609000 | 1.774723000  |
| 6  | -2.486763000 | 0.074180000  | 2.303980000  |
| 6  | 3.094677000  | -0.587863000 | -2.546486000 |
| 6  | 4.143255000  | -0.790126000 | -1.631272000 |
| 6  | 3.906510000  | -0.696737000 | -0.242565000 |
| 6  | -1.441774000 | -3.680974000 | -1.156982000 |
| 6  | 1.037256000  | -3.481331000 | 0.829305000  |
| 1  | 0.980858000  | -4.273044000 | 1.581841000  |
| 1  | 3.269075000  | -0.689444000 | -3.612118000 |
| 1  | 4.703904000  | -0.855945000 | 0.472750000  |
| 1  | -0.502436000 | -4.198312000 | -1.355635000 |
| 1  | 1.929712000  | -2.893161000 | 1.052373000  |
| 1  | -1.759354000 | 0.689446000  | 2.833142000  |
| 1  | -2.205853000 | -4.429689000 | -0.925494000 |
| 1  | 1.163893000  | -3.947192000 | -0.149870000 |
| 1  | -3.094466000 | 0.702225000  | 1.651006000  |
| 1  | -1.765582000 | -3.171308000 | -2.065276000 |
| 1  | -3.165721000 | -0.374270000 | 3.035530000  |
| 6  | 0.641101000  | -0.253477000 | -2.981811000 |
| 8  | 0.724894000  | -0.121428000 | -4.237875000 |
| 8  | -0.534334000 | -0.398326000 | -2.353989000 |
| 6  | 0.567365000  | 1.520133000  | -0.178959000 |
| 6  | -0.715702000 | 1.448116000  | -0.384283000 |
| 6  | 0.408536000  | -1.048292000 | 2.865202000  |
| 6  | -3.640773000 | -1.626356000 | -0.208864000 |
| 6  | 2.180837000  | -1.651749000 | 4.397452000  |
| 1  | 1.613603000  | -1.345069000 | 5.275411000  |
| 1  | 2.759766000  | -2.547136000 | 4.596207000  |
| 1  | 2.816929000  | -0.834017000 | 4.057742000  |
| 6  | -5.898277000 | -0.789271000 | 0.070524000  |
| 1  | -6.364176000 | -0.057342000 | 0.722655000  |
| 1  | -5.868928000 | -0.441664000 | -0.961864000 |
| 1  | -6.410963000 | -1.749311000 | 0.126091000  |
| 8  | 0.410501000  | 0.107689000  | 3.344989000  |
| 8  | -3.978293000 | -2.112199000 | -1.313810000 |
| 8  | 1.247216000  | -2.037424000 | 3.316627000  |
| 8  | -4.525274000 | -0.938836000 | 0.593621000  |
| 6  | -1.954231000 | 2.162102000  | -0.583008000 |
| 6  | -2.126692000 | 3.462851000  | -0.048923000 |
| 6  | -3.018558000 | 1.560357000  | -1.292144000 |
| 6  | -3.343093000 | 4.134623000  | -0.219962000 |

|   |              |              |              |
|---|--------------|--------------|--------------|
| 6 | -4.228101000 | 2.241117000  | -1.465611000 |
| 6 | -4.397674000 | 3.527108000  | -0.924245000 |
| 1 | -1.316015000 | 3.930862000  | 0.499058000  |
| 1 | -2.867958000 | 0.572915000  | -1.719319000 |
| 1 | -3.470811000 | 5.125571000  | 0.199020000  |
| 1 | -5.035246000 | 1.771561000  | -2.015534000 |
| 1 | -5.339054000 | 4.048409000  | -1.049689000 |
| 6 | 1.578684000  | 2.413741000  | 0.372714000  |
| 6 | 2.780983000  | 2.684734000  | -0.317212000 |
| 6 | 1.306265000  | 3.085450000  | 1.586842000  |
| 6 | 3.687456000  | 3.620376000  | 0.191453000  |
| 6 | 2.224106000  | 4.013854000  | 2.096770000  |
| 6 | 3.413997000  | 4.284034000  | 1.401587000  |
| 1 | 2.986735000  | 2.172418000  | -1.251807000 |
| 1 | 0.387178000  | 2.866227000  | 2.120872000  |
| 1 | 4.600236000  | 3.834821000  | -0.350786000 |
| 1 | 2.012852000  | 4.520065000  | 3.030815000  |
| 1 | 4.122296000  | 5.001552000  | 1.797928000  |
| 1 | 2.476144000  | -0.241411000 | 1.289033000  |
| 8 | 5.379279000  | -1.088765000 | -2.187209000 |
| 6 | 6.488883000  | -1.357352000 | -1.268873000 |
| 1 | 6.706218000  | -0.477467000 | -0.658202000 |
| 1 | 6.255827000  | -2.210713000 | -0.627121000 |
| 1 | 7.335978000  | -1.589561000 | -1.907077000 |

**TS2\_H\_CpE**; Gibbs free energy ... -1644.72237388 Eh

|    |              |              |              |
|----|--------------|--------------|--------------|
| 45 | 0.394525000  | -0.158885000 | -0.221723000 |
| 6  | -1.429077000 | -1.205449000 | -0.373168000 |
| 6  | -1.300069000 | -2.367081000 | -1.180711000 |
| 6  | -2.702794000 | -0.577642000 | -0.327214000 |
| 6  | 1.424862000  | 1.767233000  | 0.430746000  |
| 6  | 2.114893000  | 1.189589000  | -0.693976000 |
| 6  | 1.203690000  | 1.200641000  | -1.867922000 |
| 6  | -0.031421000 | 1.776542000  | -1.462003000 |
| 6  | 0.070263000  | 2.050463000  | -0.032689000 |
| 6  | 1.933724000  | 2.095209000  | 1.794241000  |
| 6  | -2.403629000 | -2.940414000 | -1.827249000 |
| 6  | -3.657781000 | -2.324648000 | -1.725870000 |
| 6  | -3.805526000 | -1.133560000 | -0.994845000 |
| 6  | 1.541872000  | 0.736997000  | -3.244589000 |
| 6  | -1.232716000 | 1.990313000  | -2.322033000 |
| 1  | -1.269683000 | 3.025307000  | -2.674514000 |
| 1  | -2.258584000 | -3.834744000 | -2.423135000 |
| 1  | -4.773180000 | -0.648112000 | -0.954257000 |
| 1  | 0.654846000  | 0.719312000  | -3.879713000 |
| 1  | -2.151576000 | 1.811201000  | -1.760561000 |
| 1  | -4.517818000 | -2.749771000 | -2.228198000 |
| 1  | 1.147627000  | 1.969074000  | 2.538505000  |
| 1  | 2.276733000  | 1.409555000  | -3.697890000 |
| 1  | -1.219996000 | 1.333706000  | -3.194941000 |
| 1  | 2.803208000  | 1.499228000  | 2.057544000  |
| 1  | 1.991132000  | -0.256453000 | -3.231749000 |
| 1  | 2.238529000  | 3.147913000  | 1.815065000  |



|   |              |              |              |
|---|--------------|--------------|--------------|
| 6 | 0.074916000  | -2.879843000 | -1.387959000 |
| 8 | 0.343762000  | -4.021899000 | -1.868069000 |
| 8 | 1.034724000  | -2.002119000 | -1.062546000 |
| 6 | -0.698102000 | -1.461400000 | 1.387582000  |
| 6 | 0.592705000  | -1.325051000 | 1.484332000  |
| 6 | 1.896119000  | -1.619386000 | 2.122849000  |
| 1 | 2.569950000  | -1.998890000 | 1.343823000  |
| 1 | 2.338715000  | -0.677933000 | 2.468932000  |
| 6 | -1.914149000 | -1.756127000 | 2.220220000  |
| 1 | -2.499114000 | -2.537648000 | 1.720314000  |
| 1 | -2.544080000 | -0.861548000 | 2.243210000  |
| 6 | -0.931553000 | 2.732155000  | 0.806130000  |
| 6 | 3.481979000  | 0.664959000  | -0.754133000 |
| 6 | -2.691849000 | 4.423297000  | 0.763205000  |
| 1 | -2.247363000 | 5.411879000  | 0.865240000  |
| 1 | -3.578766000 | 4.458263000  | 0.137037000  |
| 1 | -2.911151000 | 4.004704000  | 1.744882000  |
| 6 | 5.556620000  | 0.297472000  | 0.436281000  |
| 1 | 5.932833000  | 0.529469000  | 1.427086000  |
| 1 | 5.517573000  | -0.779265000 | 0.270718000  |
| 1 | 6.159915000  | 0.771522000  | -0.337333000 |
| 8 | -1.032341000 | 2.634672000  | 2.047722000  |
| 8 | 3.986190000  | 0.084617000  | -1.743874000 |
| 8 | -1.726379000 | 3.561681000  | 0.048429000  |
| 8 | 4.189135000  | 0.855653000  | 0.414060000  |
| 8 | -2.772796000 | 0.590911000  | 0.423850000  |
| 6 | -4.095853000 | 1.177725000  | 0.640915000  |
| 1 | -3.946347000 | 1.956186000  | 1.384456000  |
| 1 | -4.478888000 | 1.606982000  | -0.289491000 |
| 1 | -4.792947000 | 0.428800000  | 1.026667000  |
| 6 | -1.552921000 | -2.176691000 | 3.646922000  |
| 1 | -2.467174000 | -2.372158000 | 4.212046000  |
| 1 | -0.947699000 | -3.085638000 | 3.653351000  |
| 1 | -0.994370000 | -1.388752000 | 4.159718000  |
| 6 | 1.833092000  | -2.624534000 | 3.283305000  |
| 1 | 1.387670000  | -3.568837000 | 2.959828000  |
| 1 | 2.844048000  | -2.826582000 | 3.644331000  |
| 1 | 1.243742000  | -2.233288000 | 4.114765000  |

TS'2\_H\_CpE; Gibbs free energy ... -1644.72294611 Eh

|    |              |              |              |
|----|--------------|--------------|--------------|
| 45 | 0.501209000  | -0.088085000 | -0.268329000 |
| 6  | -1.505455000 | -0.614545000 | 0.085189000  |
| 6  | -1.956174000 | -1.552586000 | -0.887718000 |
| 6  | -2.459612000 | 0.252293000  | 0.662400000  |
| 6  | 1.923374000  | 1.500068000  | 0.496430000  |
| 6  | 2.443521000  | 0.997776000  | -0.750526000 |
| 6  | 1.474926000  | 1.302311000  | -1.817096000 |
| 6  | 0.384818000  | 2.035873000  | -1.250407000 |
| 6  | 0.622043000  | 2.093593000  | 0.183346000  |
| 6  | 2.578491000  | 1.488684000  | 1.837181000  |
| 6  | -3.308140000 | -1.665342000 | -1.210874000 |
| 6  | -4.241581000 | -0.802271000 | -0.609276000 |
| 6  | -3.812912000 | 0.173437000  | 0.314102000  |

|   |              |              |              |
|---|--------------|--------------|--------------|
| 6 | 1.640433000  | 0.961180000  | -3.258395000 |
| 6 | -0.804861000 | 2.551941000  | -1.990319000 |
| 1 | -0.730236000 | 3.632789000  | -2.139832000 |
| 1 | -3.632874000 | -2.388929000 | -1.950951000 |
| 1 | -4.517241000 | 0.860890000  | 0.766910000  |
| 1 | 0.740665000  | 1.194088000  | -3.828432000 |
| 1 | -1.726190000 | 2.373300000  | -1.430888000 |
| 1 | 1.863186000  | 1.732111000  | 2.620761000  |
| 1 | 2.472937000  | 1.532576000  | -3.681028000 |
| 1 | -0.894725000 | 2.077346000  | -2.969287000 |
| 1 | 3.034750000  | 0.520399000  | 2.045663000  |
| 1 | 1.886695000  | -0.092640000 | -3.392665000 |
| 1 | 3.388288000  | 2.224467000  | 1.854691000  |
| 6 | -0.920752000 | -2.321077000 | -1.622545000 |
| 8 | -1.161956000 | -3.353712000 | -2.316002000 |
| 8 | 0.309205000  | -1.799321000 | -1.520333000 |
| 6 | -0.354016000 | -1.389071000 | 1.446761000  |
| 6 | 0.865156000  | -1.637610000 | 1.068315000  |
| 6 | 2.144509000  | -2.380471000 | 1.095801000  |
| 1 | 2.361717000  | -2.711040000 | 0.071753000  |
| 1 | 2.951874000  | -1.685587000 | 1.362027000  |
| 6 | -1.219215000 | -1.450187000 | 2.671801000  |
| 1 | -2.202359000 | -1.849785000 | 2.399788000  |
| 1 | -1.389785000 | -0.427883000 | 3.027504000  |
| 6 | -0.251720000 | 2.725509000  | 1.186344000  |
| 6 | 3.698653000  | 0.285490000  | -0.969945000 |
| 6 | -2.029461000 | 4.335832000  | 1.528704000  |
| 1 | -1.493987000 | 4.837290000  | 2.333885000  |
| 1 | -2.553159000 | 5.047300000  | 0.899444000  |
| 1 | -2.713853000 | 3.592308000  | 1.938631000  |
| 6 | 5.774866000  | -0.457306000 | 0.029902000  |
| 1 | 6.250253000  | -0.348427000 | 0.999307000  |
| 1 | 5.549156000  | -1.502508000 | -0.184681000 |
| 1 | 6.395173000  | -0.039335000 | -0.762513000 |
| 8 | -0.283270000 | 2.450179000  | 2.407780000  |
| 8 | 4.028711000  | -0.302435000 | -2.027961000 |
| 8 | -1.066818000 | 3.673363000  | 0.622184000  |
| 8 | 4.518434000  | 0.309836000  | 0.140794000  |
| 6 | -0.574391000 | -2.285749000 | 3.780933000  |
| 1 | -1.226244000 | -2.302459000 | 4.657007000  |
| 1 | -0.411513000 | -3.315661000 | 3.454521000  |
| 1 | 0.390019000  | -1.865179000 | 4.079122000  |
| 6 | 2.159199000  | -3.588854000 | 2.045690000  |
| 1 | 1.345097000  | -4.279600000 | 1.812973000  |
| 1 | 3.106614000  | -4.121743000 | 1.939455000  |
| 1 | 2.057063000  | -3.274798000 | 3.086291000  |
| 1 | -2.158228000 | 0.975746000  | 1.414028000  |
| 8 | -5.563559000 | -0.977239000 | -1.000453000 |
| 6 | -6.567132000 | -0.087985000 | -0.411303000 |
| 1 | -7.513226000 | -0.405587000 | -0.838943000 |
| 1 | -6.588512000 | -0.199875000 | 0.675941000  |
| 1 | -6.360868000 | 0.952474000  | -0.674700000 |

Int0\_CpPh3; Gibbs free energy ... -1758.68599697 Eh

|    |              |              |              |
|----|--------------|--------------|--------------|
| 45 | -0.276136000 | -0.482983000 | 0.533250000  |
| 8  | -1.054175000 | -1.566298000 | 2.309604000  |
| 6  | 0.144731000  | -1.876660000 | 2.733226000  |
| 6  | 2.531631000  | 1.225853000  | 1.048325000  |
| 6  | 0.356578000  | -2.550829000 | 4.046744000  |
| 8  | 1.143031000  | -1.540992000 | 1.958745000  |
| 6  | 1.647260000  | 2.308597000  | 0.932660000  |
| 6  | 3.789662000  | 1.284486000  | 0.426450000  |
| 6  | -1.774133000 | -0.907190000 | -1.034999000 |
| 6  | -1.330405000 | 0.488292000  | -1.123769000 |
| 6  | 0.095070000  | 0.459941000  | -1.401016000 |
| 6  | 0.541312000  | -0.911757000 | -1.498685000 |
| 6  | -0.604888000 | -1.750793000 | -1.204125000 |
| 6  | 2.009103000  | 3.441358000  | 0.174950000  |
| 6  | 3.247144000  | 3.467777000  | -0.477134000 |
| 6  | 4.151608000  | 2.399134000  | -0.352811000 |
| 1  | 1.319180000  | 4.274197000  | 0.100546000  |
| 1  | 5.113996000  | 2.447530000  | -0.847729000 |
| 1  | 0.498769000  | -1.791574000 | 4.819873000  |
| 1  | -0.512173000 | -3.149358000 | 4.315433000  |
| 1  | 1.249324000  | -3.173610000 | 4.018735000  |
| 6  | 0.336769000  | 2.287174000  | 1.660565000  |
| 8  | -0.203359000 | 3.370582000  | 2.045283000  |
| 8  | -0.210719000 | 1.101176000  | 1.932206000  |
| 1  | -0.623449000 | -2.829116000 | -1.220467000 |
| 1  | 0.720607000  | 1.333653000  | -1.511322000 |
| 1  | 2.263877000  | 0.352091000  | 1.633789000  |
| 6  | -2.093528000 | 1.728514000  | -0.936680000 |
| 6  | -3.114934000 | 1.835435000  | 0.033827000  |
| 6  | -1.758755000 | 2.860504000  | -1.711353000 |
| 6  | -3.794784000 | 3.044581000  | 0.210853000  |
| 6  | -2.443880000 | 4.068941000  | -1.532986000 |
| 6  | -3.463933000 | 4.164660000  | -0.573216000 |
| 1  | -3.355031000 | 0.981742000  | 0.660012000  |
| 1  | -0.974470000 | 2.786633000  | -2.457483000 |
| 1  | -4.568687000 | 3.121862000  | 0.964610000  |
| 1  | -2.180811000 | 4.929626000  | -2.135578000 |
| 1  | -3.987815000 | 5.102043000  | -0.430327000 |
| 6  | -3.132600000 | -1.412229000 | -0.833824000 |
| 6  | -3.349282000 | -2.594133000 | -0.090800000 |
| 6  | -4.230872000 | -0.768705000 | -1.445848000 |
| 6  | -4.642134000 | -3.107552000 | 0.054751000  |
| 6  | -5.521113000 | -1.293278000 | -1.307357000 |
| 6  | -5.731619000 | -2.459253000 | -0.552793000 |
| 1  | -2.509952000 | -3.088167000 | 0.387634000  |
| 1  | -4.069826000 | 0.123335000  | -2.040790000 |
| 1  | -4.802495000 | -4.006645000 | 0.636879000  |
| 1  | -6.354559000 | -0.798065000 | -1.790010000 |
| 1  | -6.731088000 | -2.861596000 | -0.440776000 |
| 6  | 1.905102000  | -1.344979000 | -1.771391000 |
| 6  | 2.825505000  | -0.446068000 | -2.357098000 |
| 6  | 2.319909000  | -2.662839000 | -1.472351000 |

|   |             |              |              |
|---|-------------|--------------|--------------|
| 6 | 4.127211000 | -0.861420000 | -2.649786000 |
| 6 | 3.628183000 | -3.069243000 | -1.752784000 |
| 6 | 4.534381000 | -2.171275000 | -2.344485000 |
| 1 | 2.518119000 | 0.565949000  | -2.598108000 |
| 1 | 1.625045000 | -3.357933000 | -1.013595000 |
| 1 | 4.823338000 | -0.167514000 | -3.105878000 |
| 1 | 3.940942000 | -4.077986000 | -1.513822000 |
| 1 | 5.547417000 | -2.487182000 | -2.563041000 |
| 1 | 3.524095000 | 4.326095000  | -1.077612000 |
| 8 | 4.617780000 | 0.185235000  | 0.649221000  |
| 6 | 5.980675000 | 0.254607000  | 0.122857000  |
| 1 | 6.454250000 | -0.672198000 | 0.434914000  |
| 1 | 5.973801000 | 0.320895000  | -0.969001000 |
| 1 | 6.511207000 | 1.112514000  | 0.545548000  |

**Int'0\_CpPh3; Gibbs free energy** ... -1758.68522237 Eh

|    |              |              |              |
|----|--------------|--------------|--------------|
| 45 | -0.586507000 | -0.765568000 | 0.568832000  |
| 8  | -1.937805000 | -1.502879000 | 2.154624000  |
| 6  | -1.029257000 | -2.296674000 | 2.664796000  |
| 6  | 2.611133000  | -0.255150000 | 1.262392000  |
| 6  | -1.279209000 | -3.049495000 | 3.928128000  |
| 8  | 0.106123000  | -2.374791000 | 2.023043000  |
| 6  | 2.180533000  | 1.081991000  | 1.333318000  |
| 6  | 3.814843000  | -0.556301000 | 0.605029000  |
| 6  | -1.900156000 | -0.297625000 | -1.143812000 |
| 6  | -0.794079000 | 0.661360000  | -1.086750000 |
| 6  | 0.433937000  | -0.097107000 | -1.245804000 |
| 6  | 0.112791000  | -1.500232000 | -1.420978000 |
| 6  | -1.323100000 | -1.623122000 | -1.291676000 |
| 6  | 2.942916000  | 2.112224000  | 0.752926000  |
| 6  | 4.125729000  | 1.789843000  | 0.069587000  |
| 6  | 4.568740000  | 0.454211000  | -0.000825000 |
| 1  | 2.589729000  | 3.133672000  | 0.839820000  |
| 1  | 5.491457000  | 0.232166000  | -0.523112000 |
| 1  | -0.999405000 | -2.426744000 | 4.781452000  |
| 1  | -2.335853000 | -3.295433000 | 4.022493000  |
| 1  | -0.677250000 | -3.956097000 | 3.957249000  |
| 6  | 0.930543000  | 1.446290000  | 2.073551000  |
| 8  | 0.834967000  | 2.570406000  | 2.658657000  |
| 8  | -0.046913000 | 0.544627000  | 2.138494000  |
| 1  | -1.895345000 | -2.532374000 | -1.388691000 |
| 1  | 1.427780000  | 0.326371000  | -1.234166000 |
| 1  | 2.018454000  | -1.038314000 | 1.725489000  |
| 1  | 4.162454000  | -1.581516000 | 0.558815000  |
| 8  | 4.937107000  | 2.726888000  | -0.567040000 |
| 6  | 4.526435000  | 4.129718000  | -0.493418000 |
| 1  | 3.549188000  | 4.271967000  | -0.963736000 |
| 1  | 4.489648000  | 4.465184000  | 0.546633000  |
| 1  | 5.289455000  | 4.678813000  | -1.037084000 |
| 6  | -0.837124000 | 2.107802000  | -0.836839000 |
| 6  | -1.796146000 | 2.672635000  | 0.034418000  |
| 6  | 0.127676000  | 2.946627000  | -1.434095000 |
| 6  | -1.800083000 | 4.047676000  | 0.284996000  |

|   |              |              |              |
|---|--------------|--------------|--------------|
| 6 | 0.118548000  | 4.325330000  | -1.182789000 |
| 6 | -0.844521000 | 4.879688000  | -0.324755000 |
| 1 | -2.513569000 | 2.029465000  | 0.533866000  |
| 1 | 0.870364000  | 2.522388000  | -2.102397000 |
| 1 | -2.531302000 | 4.466924000  | 0.965086000  |
| 1 | 0.860006000  | 4.961579000  | -1.650812000 |
| 1 | -0.846195000 | 5.944542000  | -0.125572000 |
| 6 | -3.339468000 | -0.032411000 | -1.102097000 |
| 6 | -4.206967000 | -0.935955000 | -0.449474000 |
| 6 | -3.880724000 | 1.083723000  | -1.776903000 |
| 6 | -5.588014000 | -0.713854000 | -0.453483000 |
| 6 | -5.264048000 | 1.295182000  | -1.787506000 |
| 6 | -6.120274000 | 0.401960000  | -1.121907000 |
| 1 | -3.791045000 | -1.789450000 | 0.076364000  |
| 1 | -3.223086000 | 1.768882000  | -2.300354000 |
| 1 | -6.245999000 | -1.403835000 | 0.060105000  |
| 1 | -5.672846000 | 2.149046000  | -2.313488000 |
| 1 | -7.190080000 | 0.572200000  | -1.126404000 |
| 6 | 1.068095000  | -2.585821000 | -1.603428000 |
| 6 | 2.404145000  | -2.303444000 | -1.966183000 |
| 6 | 0.670907000  | -3.931632000 | -1.426750000 |
| 6 | 3.322500000  | -3.343028000 | -2.143039000 |
| 6 | 1.592278000  | -4.967663000 | -1.601579000 |
| 6 | 2.921275000  | -4.676588000 | -1.958898000 |
| 1 | 2.718658000  | -1.277417000 | -2.121194000 |
| 1 | -0.349951000 | -4.161216000 | -1.141301000 |
| 1 | 4.344674000  | -3.115635000 | -2.419877000 |
| 1 | 1.281745000  | -5.994993000 | -1.457979000 |
| 1 | 3.636116000  | -5.479103000 | -2.093373000 |

**TS0\_CpPh3**; Gibbs free energy ... -1758.66127773 Eh

|    |              |              |              |
|----|--------------|--------------|--------------|
| 45 | 0.267169000  | -0.349264000 | 0.485644000  |
| 8  | 1.664360000  | -1.164445000 | 1.932136000  |
| 6  | 2.344516000  | -0.411267000 | 2.733815000  |
| 6  | 0.534157000  | 1.759912000  | 0.930555000  |
| 6  | 3.322400000  | -1.032534000 | 3.684944000  |
| 8  | 2.214286000  | 0.890431000  | 2.742891000  |
| 6  | -0.659350000 | 2.225258000  | 1.552914000  |
| 6  | 1.247351000  | 2.679647000  | 0.114110000  |
| 6  | -0.971751000 | -0.292666000 | -1.351313000 |
| 6  | -1.099298000 | -1.643187000 | -0.772551000 |
| 6  | 0.204819000  | -2.228320000 | -0.747465000 |
| 6  | 1.172683000  | -1.293888000 | -1.315982000 |
| 6  | 0.432861000  | -0.109558000 | -1.673111000 |
| 6  | -1.098520000 | 3.545306000  | 1.422579000  |
| 6  | -0.357387000 | 4.431179000  | 0.621344000  |
| 6  | 0.810679000  | 4.012001000  | -0.032725000 |
| 1  | 1.361908000  | 4.713379000  | -0.647033000 |
| 1  | 4.313010000  | -0.606615000 | 3.519412000  |
| 1  | 3.034324000  | -0.798494000 | 4.711092000  |
| 1  | 3.356946000  | -2.110620000 | 3.551545000  |
| 1  | 1.370369000  | 1.240061000  | 1.805899000  |
| 6  | -1.402908000 | 1.215431000  | 2.365552000  |

|   |              |              |              |
|---|--------------|--------------|--------------|
| 8 | -2.334775000 | 1.523903000  | 3.167603000  |
| 8 | -0.996960000 | -0.046101000 | 2.183437000  |
| 1 | -2.004020000 | 3.862805000  | 1.926965000  |
| 8 | 2.401035000  | 2.183308000  | -0.469448000 |
| 6 | 3.217974000  | 3.104506000  | -1.268130000 |
| 1 | 2.661278000  | 3.434326000  | -2.148841000 |
| 1 | 3.524117000  | 3.965601000  | -0.669982000 |
| 1 | 4.087350000  | 2.525579000  | -1.566186000 |
| 1 | -0.691488000 | 5.453998000  | 0.495736000  |
| 1 | 0.434400000  | -3.196047000 | -0.327040000 |
| 6 | 2.606580000  | -1.524275000 | -1.485042000 |
| 6 | 3.416939000  | -0.570463000 | -2.140535000 |
| 6 | 3.207733000  | -2.703265000 | -0.989909000 |
| 6 | 4.789886000  | -0.789170000 | -2.293172000 |
| 6 | 4.581433000  | -2.920582000 | -1.144877000 |
| 6 | 5.378821000  | -1.964980000 | -1.796492000 |
| 1 | 2.974126000  | 0.342021000  | -2.524137000 |
| 1 | 2.605643000  | -3.445236000 | -0.477025000 |
| 1 | 5.398422000  | -0.047685000 | -2.797348000 |
| 1 | 5.026894000  | -3.829646000 | -0.759283000 |
| 1 | 6.442242000  | -2.133021000 | -1.916466000 |
| 6 | -2.297630000 | -2.272756000 | -0.204491000 |
| 6 | -2.455202000 | -3.672982000 | -0.290856000 |
| 6 | -3.283780000 | -1.508336000 | 0.458012000  |
| 6 | -3.584201000 | -4.294071000 | 0.257931000  |
| 6 | -4.406946000 | -2.132578000 | 1.009660000  |
| 6 | -4.563509000 | -3.526298000 | 0.908738000  |
| 1 | -1.703226000 | -4.265367000 | -0.801382000 |
| 1 | -3.155558000 | -0.435880000 | 0.557276000  |
| 1 | -3.699202000 | -5.368191000 | 0.177662000  |
| 1 | -5.154212000 | -1.538910000 | 1.522165000  |
| 1 | -5.435311000 | -4.006700000 | 1.336555000  |
| 6 | -2.044950000 | 0.622669000  | -1.766126000 |
| 6 | -3.263927000 | 0.120726000  | -2.273762000 |
| 6 | -1.840732000 | 2.018199000  | -1.743516000 |
| 6 | -4.258324000 | 0.997722000  | -2.725385000 |
| 6 | -2.835842000 | 2.893319000  | -2.192394000 |
| 6 | -4.051806000 | 2.386360000  | -2.681986000 |
| 1 | -3.425385000 | -0.950333000 | -2.326603000 |
| 1 | -0.902555000 | 2.414129000  | -1.365465000 |
| 1 | -5.187775000 | 0.599222000  | -3.114255000 |
| 1 | -2.664580000 | 3.963207000  | -2.158249000 |
| 1 | -4.822862000 | 3.062754000  | -3.030946000 |
| 1 | 0.846770000  | 0.782796000  | -2.119823000 |

**TS'0\_CpPh3; Gibbs free energy** ... -1758.65655991 Eh

|    |              |              |             |
|----|--------------|--------------|-------------|
| 45 | -0.697060000 | 0.026527000  | 0.420183000 |
| 8  | -2.236889000 | -0.361767000 | 1.899383000 |
| 6  | -2.233146000 | -1.428259000 | 2.630289000 |
| 6  | 0.426462000  | -1.815232000 | 0.617751000 |
| 6  | -3.331376000 | -1.648104000 | 3.625865000 |
| 8  | -1.306623000 | -2.345100000 | 2.512707000 |
| 6  | 1.674695000  | -1.480718000 | 1.218300000 |

|   |              |              |              |
|---|--------------|--------------|--------------|
| 6 | 0.419029000  | -2.889583000 | -0.314852000 |
| 6 | 0.257995000  | 0.993337000  | -1.329594000 |
| 6 | -0.508049000 | 2.038733000  | -0.622954000 |
| 6 | -1.879638000 | 1.644498000  | -0.624187000 |
| 6 | -2.026976000 | 0.375848000  | -1.333434000 |
| 6 | -0.704254000 | -0.002841000 | -1.763491000 |
| 6 | 2.846799000  | -2.192904000 | 0.957657000  |
| 6 | 2.797097000  | -3.252988000 | 0.031905000  |
| 6 | 1.581728000  | -3.603924000 | -0.599766000 |
| 1 | 1.577641000  | -4.433118000 | -1.296581000 |
| 1 | -4.041521000 | -2.371894000 | 3.219383000  |
| 1 | -2.927232000 | -2.060630000 | 4.549337000  |
| 1 | -3.855818000 | -0.716938000 | 3.825891000  |
| 1 | -0.506982000 | -2.021424000 | 1.547952000  |
| 6 | 1.666911000  | -0.319717000 | 2.159525000  |
| 8 | 2.632502000  | -0.052169000 | 2.936339000  |
| 8 | 0.547947000  | 0.410943000  | 2.119649000  |
| 1 | 3.763510000  | -1.900615000 | 1.458140000  |
| 1 | -2.669684000 | 2.182223000  | -0.121603000 |
| 6 | -3.275525000 | -0.351988000 | -1.564228000 |
| 6 | -3.276349000 | -1.579070000 | -2.266445000 |
| 6 | -4.501157000 | 0.151135000  | -1.072405000 |
| 6 | -4.468682000 | -2.280700000 | -2.470360000 |
| 6 | -5.692642000 | -0.553891000 | -1.276583000 |
| 6 | -5.682580000 | -1.772103000 | -1.975712000 |
| 1 | -2.347330000 | -1.983470000 | -2.653526000 |
| 1 | -4.526248000 | 1.089068000  | -0.528921000 |
| 1 | -4.454827000 | -3.216549000 | -3.015673000 |
| 1 | -6.624718000 | -0.156504000 | -0.893433000 |
| 1 | -6.606339000 | -2.314925000 | -2.135657000 |
| 6 | 0.002207000  | 3.234041000  | 0.059726000  |
| 6 | -0.777493000 | 4.411505000  | 0.062093000  |
| 6 | 1.240701000  | 3.227475000  | 0.738616000  |
| 6 | -0.322517000 | 5.561658000  | 0.718595000  |
| 6 | 1.687933000  | 4.375805000  | 1.400590000  |
| 6 | 0.910026000  | 5.547408000  | 1.390993000  |
| 1 | -1.724717000 | 4.427703000  | -0.466616000 |
| 1 | 1.833980000  | 2.319783000  | 0.763415000  |
| 1 | -0.925529000 | 6.461391000  | 0.707243000  |
| 1 | 2.633497000  | 4.355961000  | 1.928902000  |
| 1 | 1.258812000  | 6.435482000  | 1.904278000  |
| 6 | 1.667651000  | 1.017716000  | -1.745527000 |
| 6 | 2.304647000  | 2.229761000  | -2.091840000 |
| 6 | 2.384508000  | -0.190396000 | -1.884311000 |
| 6 | 3.631432000  | 2.229488000  | -2.540871000 |
| 6 | 3.710939000  | -0.188727000 | -2.328478000 |
| 6 | 4.342591000  | 1.023392000  | -2.654207000 |
| 1 | 1.759690000  | 3.164849000  | -2.025895000 |
| 1 | 1.898892000  | -1.129292000 | -1.633373000 |
| 1 | 4.106792000  | 3.166348000  | -2.805644000 |
| 1 | 4.248248000  | -1.126669000 | -2.417658000 |
| 1 | 5.371412000  | 1.027752000  | -2.993873000 |
| 1 | -0.449368000 | -0.875046000 | -2.346724000 |

|   |              |              |              |
|---|--------------|--------------|--------------|
| 1 | -0.512108000 | -3.179543000 | -0.791344000 |
| 8 | 3.893870000  | -4.011596000 | -0.329806000 |
| 6 | 5.186441000  | -3.673838000 | 0.277840000  |
| 1 | 5.892030000  | -4.382748000 | -0.143340000 |
| 1 | 5.471810000  | -2.651246000 | 0.018454000  |
| 1 | 5.137140000  | -3.785680000 | 1.363361000  |

**Int1\_CpPh3; Gibbs free energy** ... -1758.67398638 Eh

|    |              |              |              |
|----|--------------|--------------|--------------|
| 45 | -0.256311000 | -0.324577000 | 0.420785000  |
| 8  | 0.811533000  | 0.424814000  | 2.189505000  |
| 6  | 1.360030000  | 1.558355000  | 2.334445000  |
| 6  | -1.827459000 | 0.925985000  | 0.733807000  |
| 6  | 2.323932000  | 1.839574000  | 3.437178000  |
| 8  | 1.150208000  | 2.599971000  | 1.513404000  |
| 6  | -2.924971000 | 0.315539000  | 1.375381000  |
| 6  | -1.985546000 | 2.250828000  | 0.299425000  |
| 6  | 1.471575000  | -1.440854000 | -0.722107000 |
| 6  | 0.258859000  | -2.161220000 | -0.823758000 |
| 6  | -0.774340000 | -1.314184000 | -1.431763000 |
| 6  | -0.121368000 | -0.060997000 | -1.765180000 |
| 6  | 1.245268000  | -0.106260000 | -1.329011000 |
| 6  | -4.158912000 | 0.975669000  | 1.521434000  |
| 6  | -4.302733000 | 2.273881000  | 1.020700000  |
| 6  | -3.209974000 | 2.926957000  | 0.419568000  |
| 1  | -3.324037000 | 3.943218000  | 0.060866000  |
| 1  | 1.911709000  | 2.597813000  | 4.105012000  |
| 1  | 2.531141000  | 0.932616000  | 3.997872000  |
| 1  | 3.250219000  | 2.239115000  | 3.021488000  |
| 1  | 0.431460000  | 2.505447000  | 0.796029000  |
| 6  | -2.674186000 | -1.030933000 | 1.945621000  |
| 8  | -3.538936000 | -1.713955000 | 2.573098000  |
| 8  | -1.414742000 | -1.465456000 | 1.775601000  |
| 1  | 0.089037000  | -3.142574000 | -0.404234000 |
| 1  | -0.570036000 | 0.768505000  | -2.290186000 |
| 6  | 2.657587000  | -1.922919000 | 0.002987000  |
| 6  | 3.457602000  | -1.040918000 | 0.764532000  |
| 6  | 2.976227000  | -3.298372000 | 0.000998000  |
| 6  | 4.543606000  | -1.521524000 | 1.503209000  |
| 6  | 4.066800000  | -3.777914000 | 0.738478000  |
| 6  | 4.853791000  | -2.892877000 | 1.493651000  |
| 1  | 3.222863000  | 0.018828000  | 0.775927000  |
| 1  | 2.376298000  | -3.983882000 | -0.588608000 |
| 1  | 5.139404000  | -0.832278000 | 2.090434000  |
| 1  | 4.303629000  | -4.835167000 | 0.722424000  |
| 1  | 5.696006000  | -3.263492000 | 2.065672000  |
| 6  | 2.254310000  | 0.899903000  | -1.693363000 |
| 6  | 3.589402000  | 0.526348000  | -1.970698000 |
| 6  | 1.874800000  | 2.245738000  | -1.892057000 |
| 6  | 4.519560000  | 1.480941000  | -2.401751000 |
| 6  | 2.805439000  | 3.198298000  | -2.317859000 |
| 6  | 4.136328000  | 2.820931000  | -2.569097000 |
| 1  | 3.895034000  | -0.508865000 | -1.873615000 |
| 1  | 0.846470000  | 2.531396000  | -1.699376000 |



|   |              |              |              |
|---|--------------|--------------|--------------|
| 1 | 5.537545000  | 1.177644000  | -2.615431000 |
| 1 | 2.496404000  | 4.227830000  | -2.457020000 |
| 1 | 4.858414000  | 3.556320000  | -2.903354000 |
| 6 | -2.165480000 | -1.681461000 | -1.713189000 |
| 6 | -3.022559000 | -0.780204000 | -2.384274000 |
| 6 | -2.690944000 | -2.912518000 | -1.263784000 |
| 6 | -4.366943000 | -1.102142000 | -2.598838000 |
| 6 | -4.038214000 | -3.231026000 | -1.474865000 |
| 6 | -4.882661000 | -2.327690000 | -2.141397000 |
| 1 | -2.640162000 | 0.172651000  | -2.735420000 |
| 1 | -2.052151000 | -3.613256000 | -0.736973000 |
| 1 | -5.011888000 | -0.401344000 | -3.115393000 |
| 1 | -4.428084000 | -4.176279000 | -1.116529000 |
| 1 | -5.925009000 | -2.573747000 | -2.305000000 |
| 1 | -4.974719000 | 0.466104000  | 2.023597000  |
| 1 | -5.248292000 | 2.794902000  | 1.107332000  |
| 8 | -0.819461000 | 2.865058000  | -0.219030000 |
| 6 | -0.899071000 | 4.286737000  | -0.583035000 |
| 1 | -1.597286000 | 4.421091000  | -1.410100000 |
| 1 | -1.206967000 | 4.882398000  | 0.279162000  |
| 1 | 0.108602000  | 4.562388000  | -0.887201000 |

**Int'1\_CpPh3; Gibbs free energy** ... -1758.66563023 Eh

|    |              |              |              |
|----|--------------|--------------|--------------|
| 45 | -0.048901000 | 0.284511000  | 0.392915000  |
| 8  | -1.034698000 | -1.208273000 | 1.731918000  |
| 6  | -0.962394000 | -2.467525000 | 1.764568000  |
| 6  | 1.733234000  | -0.700471000 | 0.265131000  |
| 6  | -1.949004000 | -3.334371000 | 2.464518000  |
| 8  | 0.028399000  | -3.157230000 | 1.147456000  |
| 6  | 2.634505000  | -0.390768000 | 1.318286000  |
| 6  | 2.201352000  | -1.520272000 | -0.778685000 |
| 6  | -2.021925000 | 1.334455000  | -0.399364000 |
| 6  | -0.987883000 | 2.287314000  | -0.285785000 |
| 6  | 0.172060000  | 1.863510000  | -1.080321000 |
| 6  | -0.219769000 | 0.630855000  | -1.746186000 |
| 6  | -1.528801000 | 0.255778000  | -1.292248000 |
| 6  | 3.940471000  | -0.887849000 | 1.339857000  |
| 6  | 4.384687000  | -1.705005000 | 0.286557000  |
| 6  | 3.517731000  | -2.024139000 | -0.774524000 |
| 1  | 3.845132000  | -2.648882000 | -1.597051000 |
| 1  | -1.448022000 | -3.912926000 | 3.241885000  |
| 1  | -2.736275000 | -2.729215000 | 2.904536000  |
| 1  | -2.377048000 | -4.044047000 | 1.754190000  |
| 1  | 0.685442000  | -2.557104000 | 0.698764000  |
| 6  | 2.121280000  | 0.502909000  | 2.388264000  |
| 8  | 2.781976000  | 0.828497000  | 3.420201000  |
| 8  | 0.876701000  | 0.947990000  | 2.168603000  |
| 1  | -1.009942000 | 3.148665000  | 0.366146000  |
| 1  | 0.357607000  | 0.083766000  | -2.475651000 |
| 1  | 1.562323000  | -1.774797000 | -1.619523000 |
| 6  | -3.292529000 | 1.369710000  | 0.337775000  |
| 6  | -3.884220000 | 0.190035000  | 0.843716000  |
| 6  | -3.928891000 | 2.607168000  | 0.580414000  |

|   |              |              |              |
|---|--------------|--------------|--------------|
| 6 | -5.079302000 | 0.248333000  | 1.569515000  |
| 6 | -5.127315000 | 2.662062000  | 1.304216000  |
| 6 | -5.708301000 | 1.483595000  | 1.801393000  |
| 1 | -3.395719000 | -0.766013000 | 0.688176000  |
| 1 | -3.492186000 | 3.520192000  | 0.188770000  |
| 1 | -5.511910000 | -0.666243000 | 1.958248000  |
| 1 | -5.605744000 | 3.619146000  | 1.475069000  |
| 1 | -6.633590000 | 1.526122000  | 2.363471000  |
| 6 | -2.287996000 | -0.901022000 | -1.791868000 |
| 6 | -3.631715000 | -0.752158000 | -2.196647000 |
| 6 | -1.668493000 | -2.161369000 | -1.925332000 |
| 6 | -4.338903000 | -1.844608000 | -2.715209000 |
| 6 | -2.377997000 | -3.253778000 | -2.437598000 |
| 6 | -3.717390000 | -3.099026000 | -2.833429000 |
| 1 | -4.114171000 | 0.215697000  | -2.111052000 |
| 1 | -0.635129000 | -2.282058000 | -1.609155000 |
| 1 | -5.368736000 | -1.717288000 | -3.026672000 |
| 1 | -1.892792000 | -4.218254000 | -2.527238000 |
| 1 | -4.268862000 | -3.943901000 | -3.228086000 |
| 6 | 1.434650000  | 2.587621000  | -1.251873000 |
| 6 | 2.494946000  | 2.002116000  | -1.981132000 |
| 6 | 1.636035000  | 3.853526000  | -0.658688000 |
| 6 | 3.722348000  | 2.659133000  | -2.107150000 |
| 6 | 2.865284000  | 4.512679000  | -0.790073000 |
| 6 | 3.914375000  | 3.918579000  | -1.510686000 |
| 1 | 2.362191000  | 1.024936000  | -2.433880000 |
| 1 | 0.835560000  | 4.324669000  | -0.098762000 |
| 1 | 4.527407000  | 2.191497000  | -2.661389000 |
| 1 | 3.004191000  | 5.484446000  | -0.331567000 |
| 1 | 4.866745000  | 4.426078000  | -1.606669000 |
| 1 | 4.605650000  | -0.637572000 | 2.159916000  |
| 8 | 5.703125000  | -2.150781000 | 0.380365000  |
| 6 | 6.201332000  | -2.994181000 | -0.706249000 |
| 1 | 5.616123000  | -3.915059000 | -0.777345000 |
| 1 | 6.167373000  | -2.457155000 | -1.658167000 |
| 1 | 7.229676000  | -3.223664000 | -0.442983000 |

**Int2\_T\_CpPh3; Gibbs free energy** ... -2068.84134237 Eh

|    |              |              |              |
|----|--------------|--------------|--------------|
| 45 | 0.019162000  | 0.267339000  | 0.161444000  |
| 6  | 0.945861000  | -1.356281000 | 0.993484000  |
| 6  | 1.554691000  | -1.119096000 | 2.237886000  |
| 6  | 1.084901000  | -2.632263000 | 0.407348000  |
| 6  | 1.463498000  | 0.312012000  | -1.592135000 |
| 6  | 0.177507000  | -0.188468000 | -2.020454000 |
| 6  | -0.803722000 | 0.871706000  | -1.905165000 |
| 6  | -0.127643000 | 2.019736000  | -1.362887000 |
| 6  | 1.265327000  | 1.703237000  | -1.191023000 |
| 6  | 2.296270000  | -2.115896000 | 2.903842000  |
| 6  | 2.434871000  | -3.370213000 | 2.303463000  |
| 6  | 1.835255000  | -3.631430000 | 1.056602000  |
| 1  | 1.952429000  | -4.610840000 | 0.606377000  |
| 6  | 1.373421000  | 0.238049000  | 2.801924000  |
| 8  | 1.850693000  | 0.621774000  | 3.913479000  |

|   |              |              |              |
|---|--------------|--------------|--------------|
| 8 | 0.648352000  | 1.059347000  | 2.026883000  |
| 1 | 0.005189000  | -1.186740000 | -2.386397000 |
| 1 | -0.559397000 | 2.991114000  | -1.173279000 |
| 6 | 2.698114000  | -0.490076000 | -1.579668000 |
| 6 | 3.671244000  | -0.335097000 | -0.567848000 |
| 6 | 2.888164000  | -1.485622000 | -2.559688000 |
| 6 | 4.815742000  | -1.139921000 | -0.552075000 |
| 6 | 4.031564000  | -2.297432000 | -2.539485000 |
| 6 | 5.001771000  | -2.125395000 | -1.538716000 |
| 1 | 3.515851000  | 0.397936000  | 0.218640000  |
| 1 | 2.139055000  | -1.627376000 | -3.332213000 |
| 1 | 5.551451000  | -1.010824000 | 0.233114000  |
| 1 | 4.163041000  | -3.059487000 | -3.298698000 |
| 1 | 5.885746000  | -2.751857000 | -1.523370000 |
| 6 | 2.264283000  | 2.678465000  | -0.735954000 |
| 6 | 3.535857000  | 2.759772000  | -1.344479000 |
| 6 | 1.928510000  | 3.600279000  | 0.278700000  |
| 6 | 4.453688000  | 3.734192000  | -0.932290000 |
| 6 | 2.851034000  | 4.565849000  | 0.696535000  |
| 6 | 4.117903000  | 4.634527000  | 0.092775000  |
| 1 | 3.795614000  | 2.070473000  | -2.140721000 |
| 1 | 0.954777000  | 3.528205000  | 0.753953000  |
| 1 | 5.424541000  | 3.794354000  | -1.409449000 |
| 1 | 2.587977000  | 5.256155000  | 1.488957000  |
| 1 | 4.833981000  | 5.380074000  | 0.417462000  |
| 6 | -2.216542000 | 0.774366000  | -2.272574000 |
| 6 | -3.053234000 | 1.911943000  | -2.236170000 |
| 6 | -2.765207000 | -0.461044000 | -2.685423000 |
| 6 | -4.397897000 | 1.818023000  | -2.611630000 |
| 6 | -4.111282000 | -0.554828000 | -3.054402000 |
| 6 | -4.933030000 | 0.585949000  | -3.022758000 |
| 1 | -2.654943000 | 2.868274000  | -1.912346000 |
| 1 | -2.141227000 | -1.349582000 | -2.706669000 |
| 1 | -5.026242000 | 2.700319000  | -2.581420000 |
| 1 | -4.517901000 | -1.509198000 | -3.367592000 |
| 1 | -5.974564000 | 0.515817000  | -3.312747000 |
| 1 | 2.745101000  | -1.889737000 | 3.865629000  |
| 6 | -1.859268000 | -0.764640000 | 1.001732000  |
| 6 | -1.984182000 | 0.492446000  | 1.065787000  |
| 6 | -2.164850000 | -2.164717000 | 1.089534000  |
| 6 | -1.600690000 | -2.988462000 | 2.091189000  |
| 6 | -3.080423000 | -2.726942000 | 0.166367000  |
| 6 | -1.946230000 | -4.343498000 | 2.163335000  |
| 6 | -3.415230000 | -4.083419000 | 0.242344000  |
| 6 | -2.849398000 | -4.897073000 | 1.238945000  |
| 1 | -0.896848000 | -2.562915000 | 2.798362000  |
| 1 | -3.522241000 | -2.092470000 | -0.595231000 |
| 1 | -1.507311000 | -4.966498000 | 2.933903000  |
| 1 | -4.117072000 | -4.502733000 | -0.468606000 |
| 1 | -3.109393000 | -5.947427000 | 1.294372000  |
| 6 | -2.630947000 | 1.760428000  | 1.274075000  |
| 6 | -4.029961000 | 1.856415000  | 1.075687000  |
| 6 | -1.901833000 | 2.913447000  | 1.641486000  |

|   |              |              |              |
|---|--------------|--------------|--------------|
| 6 | -4.677067000 | 3.088101000  | 1.233598000  |
| 6 | -2.556379000 | 4.139959000  | 1.795889000  |
| 6 | -3.944249000 | 4.233855000  | 1.588838000  |
| 1 | -4.590452000 | 0.973900000  | 0.784774000  |
| 1 | -0.833345000 | 2.819208000  | 1.806041000  |
| 1 | -5.746587000 | 3.155657000  | 1.072935000  |
| 1 | -1.987674000 | 5.019322000  | 2.074154000  |
| 1 | -4.446340000 | 5.187167000  | 1.703180000  |
| 1 | 3.000188000  | -4.154480000 | 2.792849000  |
| 8 | 0.438641000  | -2.842155000 | -0.810836000 |
| 6 | 0.542230000  | -4.168100000 | -1.411580000 |
| 1 | 1.581978000  | -4.404609000 | -1.658890000 |
| 1 | 0.138869000  | -4.932160000 | -0.739516000 |
| 1 | -0.055882000 | -4.118588000 | -2.319031000 |

**Int'2\_T\_CpPh3; Gibbs free energy** ... -2068.83387785 Eh

|    |              |              |              |
|----|--------------|--------------|--------------|
| 45 | 0.303519000  | 0.219198000  | -0.063000000 |
| 6  | -1.463927000 | -0.678513000 | -0.557798000 |
| 6  | -1.959364000 | -0.337110000 | -1.832773000 |
| 6  | -2.230733000 | -1.514062000 | 0.266180000  |
| 6  | -0.639571000 | 1.316352000  | 1.699554000  |
| 6  | 0.169323000  | 0.209115000  | 2.157747000  |
| 6  | 1.561323000  | 0.484083000  | 1.844079000  |
| 6  | 1.601198000  | 1.741105000  | 1.150751000  |
| 6  | 0.267020000  | 2.272923000  | 1.070097000  |
| 6  | -3.192703000 | -0.824079000 | -2.290566000 |
| 6  | -3.949615000 | -1.658102000 | -1.455817000 |
| 6  | -3.475465000 | -2.000078000 | -0.172923000 |
| 1  | -4.058392000 | -2.635512000 | 0.484070000  |
| 6  | -1.129462000 | 0.583570000  | -2.641293000 |
| 8  | -1.426923000 | 0.986905000  | -3.806607000 |
| 8  | -0.008160000 | 0.982658000  | -2.021341000 |
| 1  | -0.200430000 | -0.653029000 | 2.694060000  |
| 1  | 2.489691000  | 2.252677000  | 0.811624000  |
| 6  | -2.100896000 | 1.390616000  | 1.865543000  |
| 6  | -2.938564000 | 1.898381000  | 0.848235000  |
| 6  | -2.689500000 | 0.879838000  | 3.040086000  |
| 6  | -4.327448000 | 1.904323000  | 1.009007000  |
| 6  | -4.083241000 | 0.883763000  | 3.199981000  |
| 6  | -4.907218000 | 1.395784000  | 2.186039000  |
| 1  | -2.501087000 | 2.260727000  | -0.078272000 |
| 1  | -2.056064000 | 0.485340000  | 3.828012000  |
| 1  | -4.957998000 | 2.285963000  | 0.214464000  |
| 1  | -4.518775000 | 0.488943000  | 4.110343000  |
| 1  | -5.984193000 | 1.394301000  | 2.305441000  |
| 6  | -0.045417000 | 3.586373000  | 0.493707000  |
| 6  | -1.011989000 | 4.435535000  | 1.075992000  |
| 6  | 0.688165000  | 4.049395000  | -0.620949000 |
| 6  | -1.244654000 | 5.710561000  | 0.544345000  |
| 6  | 0.448319000  | 5.319484000  | -1.155795000 |
| 6  | -0.520767000 | 6.154721000  | -0.575256000 |
| 1  | -1.565990000 | 4.105056000  | 1.947633000  |
| 1  | 1.429449000  | 3.397956000  | -1.073959000 |

|   |              |              |              |
|---|--------------|--------------|--------------|
| 1 | -1.983309000 | 6.356737000  | 1.003238000  |
| 1 | 1.010643000  | 5.654119000  | -2.019049000 |
| 1 | -0.705814000 | 7.139485000  | -0.987358000 |
| 6 | 2.704447000  | -0.365791000 | 2.177602000  |
| 6 | 3.963915000  | -0.149999000 | 1.574754000  |
| 6 | 2.566000000  | -1.413729000 | 3.114046000  |
| 6 | 5.053803000  | -0.965262000 | 1.898235000  |
| 6 | 3.657666000  | -2.227920000 | 3.437480000  |
| 6 | 4.905450000  | -2.007563000 | 2.829514000  |
| 1 | 4.085286000  | 0.644216000  | 0.843748000  |
| 1 | 1.608786000  | -1.581389000 | 3.597018000  |
| 1 | 6.012691000  | -0.794771000 | 1.422585000  |
| 1 | 3.538100000  | -3.023756000 | 4.162538000  |
| 1 | 5.752012000  | -2.635028000 | 3.081222000  |
| 1 | -3.555876000 | -0.549097000 | -3.275710000 |
| 8 | -5.167387000 | -2.106664000 | -1.979274000 |
| 6 | -5.981362000 | -2.964477000 | -1.120426000 |
| 1 | -5.434097000 | -3.871379000 | -0.847220000 |
| 1 | -6.282975000 | -2.429007000 | -0.215417000 |
| 1 | -6.854989000 | -3.220755000 | -1.712787000 |
| 1 | -1.879984000 | -1.799605000 | 1.253321000  |
| 6 | 1.125404000  | -1.810671000 | -0.699409000 |
| 6 | 1.899092000  | -0.900552000 | -1.115496000 |
| 6 | 0.497970000  | -3.079982000 | -0.460364000 |
| 6 | -0.114011000 | -3.783973000 | -1.523981000 |
| 6 | 0.466307000  | -3.625292000 | 0.842354000  |
| 6 | -0.739094000 | -5.013285000 | -1.281736000 |
| 6 | -0.154825000 | -4.857610000 | 1.075312000  |
| 6 | -0.762953000 | -5.553163000 | 0.015614000  |
| 1 | -0.098333000 | -3.360872000 | -2.522365000 |
| 1 | 0.927151000  | -3.075402000 | 1.657637000  |
| 1 | -1.211451000 | -5.544767000 | -2.099138000 |
| 1 | -0.171402000 | -5.270368000 | 2.076802000  |
| 1 | -1.247839000 | -6.504776000 | 0.197363000  |
| 6 | 3.091398000  | -0.311854000 | -1.665075000 |
| 6 | 4.267785000  | -1.096721000 | -1.748119000 |
| 6 | 3.125433000  | 1.034384000  | -2.088395000 |
| 6 | 5.454144000  | -0.530984000 | -2.228979000 |
| 6 | 4.315610000  | 1.592106000  | -2.568938000 |
| 6 | 5.485227000  | 0.814700000  | -2.635739000 |
| 1 | 4.245072000  | -2.129417000 | -1.417866000 |
| 1 | 2.208450000  | 1.612284000  | -2.043035000 |
| 1 | 6.353068000  | -1.134038000 | -2.276304000 |
| 1 | 4.332256000  | 2.628255000  | -2.886091000 |
| 1 | 6.408254000  | 1.248356000  | -3.001705000 |

**Int2\_H\_CpPh3**; Gibbs free energy ... -1764.10221445 Eh

|    |              |              |              |
|----|--------------|--------------|--------------|
| 45 | -0.243705000 | 0.190414000  | 0.336045000  |
| 6  | 0.368645000  | -1.670299000 | 0.931605000  |
| 6  | 1.138217000  | -1.681519000 | 2.112778000  |
| 6  | 0.169368000  | -2.901085000 | 0.265363000  |
| 6  | 1.055371000  | 0.351957000  | -1.491028000 |
| 6  | -0.252811000 | -0.134997000 | -1.868934000 |

|   |              |              |              |
|---|--------------|--------------|--------------|
| 6 | -1.232615000 | 0.889977000  | -1.588628000 |
| 6 | -0.517511000 | 2.038016000  | -1.070046000 |
| 6 | 0.876790000  | 1.737778000  | -1.035958000 |
| 6 | 1.694023000  | -2.866600000 | 2.636653000  |
| 6 | 1.486143000  | -4.069412000 | 1.959935000  |
| 6 | 0.727725000  | -4.090218000 | 0.774157000  |
| 1 | 0.576484000  | -5.032098000 | 0.258866000  |
| 6 | 1.364834000  | -0.369567000 | 2.759772000  |
| 8 | 2.019117000  | -0.203315000 | 3.835508000  |
| 8 | 0.824176000  | 0.664492000  | 2.099805000  |
| 1 | -0.454672000 | -1.125300000 | -2.242445000 |
| 1 | -0.947435000 | 2.995423000  | -0.817469000 |
| 6 | 2.291498000  | -0.447069000 | -1.559190000 |
| 6 | 3.294660000  | -0.313262000 | -0.573066000 |
| 6 | 2.457186000  | -1.418866000 | -2.567964000 |
| 6 | 4.440626000  | -1.114400000 | -0.606859000 |
| 6 | 3.602950000  | -2.229025000 | -2.596047000 |
| 6 | 4.600836000  | -2.077794000 | -1.619355000 |
| 1 | 3.161453000  | 0.405104000  | 0.230614000  |
| 1 | 1.691181000  | -1.542052000 | -3.327181000 |
| 1 | 5.197757000  | -0.998800000 | 0.159766000  |
| 1 | 3.716370000  | -2.972821000 | -3.375969000 |
| 1 | 5.485356000  | -2.703236000 | -1.640606000 |
| 6 | 1.921390000  | 2.701970000  | -0.669699000 |
| 6 | 3.122060000  | 2.750063000  | -1.412175000 |
| 6 | 1.711143000  | 3.650262000  | 0.355525000  |
| 6 | 4.092301000  | 3.718550000  | -1.131332000 |
| 6 | 2.686336000  | 4.614544000  | 0.638848000  |
| 6 | 3.879419000  | 4.652497000  | -0.103289000 |
| 1 | 3.283690000  | 2.037976000  | -2.214073000 |
| 1 | 0.794420000  | 3.612733000  | 0.937228000  |
| 1 | 5.004549000  | 3.748610000  | -1.714794000 |
| 1 | 2.519048000  | 5.333001000  | 1.432272000  |
| 1 | 4.631174000  | 5.402299000  | 0.112560000  |
| 6 | -2.679546000 | 0.782893000  | -1.785847000 |
| 6 | -3.553250000 | 1.738147000  | -1.219224000 |
| 6 | -3.228672000 | -0.287515000 | -2.525981000 |
| 6 | -4.937373000 | 1.628212000  | -1.392534000 |
| 6 | -4.614077000 | -0.397197000 | -2.697639000 |
| 6 | -5.473798000 | 0.560335000  | -2.132655000 |
| 1 | -3.149585000 | 2.556468000  | -0.631352000 |
| 1 | -2.571081000 | -1.027151000 | -2.971725000 |
| 1 | -5.596548000 | 2.366079000  | -0.951031000 |
| 1 | -5.021624000 | -1.222172000 | -3.269544000 |
| 1 | -6.545738000 | 0.474347000  | -2.264632000 |
| 1 | 2.281266000  | -2.816873000 | 3.547787000  |
| 1 | 1.903131000  | -4.995578000 | 2.337383000  |
| 8 | -0.594406000 | -2.874907000 | -0.905159000 |
| 6 | -0.810170000 | -4.134181000 | -1.609690000 |
| 1 | 0.140413000  | -4.567125000 | -1.937482000 |
| 1 | -1.345002000 | -4.850174000 | -0.978161000 |
| 1 | -1.416208000 | -3.873204000 | -2.474281000 |
| 6 | -1.973709000 | 0.656516000  | 1.709672000  |

|   |              |              |              |
|---|--------------|--------------|--------------|
| 6 | -2.214555000 | -0.485358000 | 1.237186000  |
| 6 | -2.912262000 | -1.740165000 | 0.901599000  |
| 1 | -2.895175000 | -1.876560000 | -0.185664000 |
| 1 | -2.355576000 | -2.587094000 | 1.319004000  |
| 6 | -2.042835000 | 1.900370000  | 2.495180000  |
| 1 | -2.012901000 | 2.764758000  | 1.822022000  |
| 1 | -1.150329000 | 1.965574000  | 3.125587000  |
| 6 | -4.360892000 | -1.737561000 | 1.418147000  |
| 1 | -4.391937000 | -1.622605000 | 2.504599000  |
| 1 | -4.931156000 | -0.918556000 | 0.970395000  |
| 1 | -4.850001000 | -2.678473000 | 1.156288000  |
| 6 | -3.318286000 | 1.942991000  | 3.357426000  |
| 1 | -3.360458000 | 1.081595000  | 4.028572000  |
| 1 | -3.330566000 | 2.853024000  | 3.960634000  |
| 1 | -4.213826000 | 1.931720000  | 2.729873000  |

**Int'2\_H\_CpPh3; Gibbs free energy** ... -1764.09981517 Eh

|    |              |              |              |
|----|--------------|--------------|--------------|
| 45 | -0.464123000 | 0.108606000  | 0.279136000  |
| 6  | 0.813825000  | -1.470764000 | 0.390330000  |
| 6  | 1.672031000  | -1.456599000 | 1.513933000  |
| 6  | 0.975769000  | -2.487349000 | -0.563043000 |
| 6  | 0.521341000  | 1.113552000  | -1.476103000 |
| 6  | -0.544923000 | 0.250164000  | -1.933812000 |
| 6  | -1.805689000 | 0.760867000  | -1.440960000 |
| 6  | -1.516860000 | 1.968561000  | -0.696371000 |
| 6  | -0.111343000 | 2.205455000  | -0.722764000 |
| 6  | 2.666312000  | -2.429829000 | 1.688596000  |
| 6  | 2.824066000  | -3.430307000 | 0.718521000  |
| 6  | 1.979755000  | -3.462048000 | -0.409632000 |
| 1  | 2.091090000  | -4.229300000 | -1.166774000 |
| 6  | 1.487424000  | -0.342681000 | 2.471488000  |
| 8  | 2.154817000  | -0.192536000 | 3.540635000  |
| 8  | 0.538881000  | 0.530747000  | 2.100477000  |
| 1  | -0.411007000 | -0.631746000 | -2.542758000 |
| 1  | -2.244397000 | 2.622685000  | -0.239847000 |
| 6  | 1.947033000  | 0.896199000  | -1.775197000 |
| 6  | 2.943917000  | 1.117705000  | -0.799186000 |
| 6  | 2.327607000  | 0.392203000  | -3.036154000 |
| 6  | 4.287618000  | 0.848708000  | -1.081765000 |
| 6  | 3.674630000  | 0.119062000  | -3.317029000 |
| 6  | 4.659115000  | 0.346130000  | -2.341950000 |
| 1  | 2.655797000  | 1.476567000  | 0.185427000  |
| 1  | 1.570354000  | 0.222049000  | -3.794608000 |
| 1  | 5.039774000  | 1.012027000  | -0.318982000 |
| 1  | 3.953750000  | -0.267565000 | -4.290173000 |
| 1  | 5.698848000  | 0.130518000  | -2.557903000 |
| 6  | 0.540168000  | 3.364817000  | -0.100446000 |
| 6  | 1.609286000  | 4.027215000  | -0.742389000 |
| 6  | 0.055419000  | 3.872432000  | 1.125606000  |
| 6  | 2.183013000  | 5.167677000  | -0.166485000 |
| 6  | 0.632630000  | 5.010332000  | 1.700848000  |
| 6  | 1.699134000  | 5.661783000  | 1.056972000  |
| 1  | 1.978514000  | 3.658164000  | -1.692972000 |

|   |              |              |              |
|---|--------------|--------------|--------------|
| 1 | -0.753923000 | 3.354206000  | 1.632200000  |
| 1 | 2.997771000  | 5.672114000  | -0.671877000 |
| 1 | 0.258399000  | 5.385241000  | 2.645878000  |
| 1 | 2.146334000  | 6.542602000  | 1.502079000  |
| 6 | -3.127792000 | 0.170693000  | -1.659463000 |
| 6 | -4.235615000 | 0.588727000  | -0.887988000 |
| 6 | -3.314704000 | -0.839663000 | -2.628715000 |
| 6 | -5.495771000 | 0.011658000  | -1.081080000 |
| 6 | -4.576379000 | -1.415985000 | -2.821699000 |
| 6 | -5.671265000 | -0.993119000 | -2.049098000 |
| 1 | -4.103985000 | 1.352674000  | -0.128304000 |
| 1 | -2.476606000 | -1.166550000 | -3.235193000 |
| 1 | -6.335896000 | 0.336068000  | -0.478711000 |
| 1 | -4.707328000 | -2.186739000 | -3.571561000 |
| 1 | -6.646968000 | -1.440441000 | -2.196602000 |
| 1 | 3.311055000  | -2.398715000 | 2.561232000  |
| 6 | -2.126281000 | -0.372213000 | 1.730939000  |
| 6 | -1.968545000 | -1.409675000 | 1.036538000  |
| 6 | -2.172666000 | -2.743355000 | 0.443186000  |
| 1 | -2.161383000 | -2.651945000 | -0.650510000 |
| 1 | -1.326704000 | -3.388518000 | 0.703170000  |
| 6 | -2.578156000 | 0.622505000  | 2.717823000  |
| 1 | -2.919089000 | 1.523388000  | 2.193944000  |
| 1 | -1.721806000 | 0.925877000  | 3.328809000  |
| 6 | -3.495511000 | -3.375562000 | 0.907246000  |
| 1 | -3.507278000 | -3.503688000 | 1.992565000  |
| 1 | -4.347401000 | -2.749157000 | 0.628027000  |
| 1 | -3.623060000 | -4.356154000 | 0.443591000  |
| 6 | -3.710777000 | 0.072130000  | 3.603002000  |
| 1 | -3.382734000 | -0.809660000 | 4.158138000  |
| 1 | -4.024143000 | 0.834593000  | 4.319313000  |
| 1 | -4.577654000 | -0.206981000 | 2.997313000  |
| 8 | 3.850506000  | -4.352089000 | 0.952422000  |
| 6 | 4.034552000  | -5.407434000 | -0.041818000 |
| 1 | 3.147065000  | -6.044429000 | -0.097444000 |
| 1 | 4.244204000  | -4.980870000 | -1.026964000 |
| 1 | 4.887729000  | -5.984285000 | 0.303322000  |
| 1 | 0.332179000  | -2.539339000 | -1.435724000 |

**TS2\_T\_CpPh3; Gibbs free energy** ... -2068.82015220 Eh

|    |              |              |              |
|----|--------------|--------------|--------------|
| 45 | -0.354061000 | 0.103534000  | -0.009025000 |
| 6  | 0.554143000  | -1.439042000 | -1.108052000 |
| 6  | -0.082254000 | -1.668853000 | -2.354935000 |
| 6  | 1.266244000  | -2.520097000 | -0.519851000 |
| 6  | -0.010497000 | 0.451959000  | 2.192646000  |
| 6  | -1.014204000 | 1.406651000  | 1.781693000  |
| 6  | -2.156368000 | 0.697664000  | 1.289441000  |
| 6  | -1.900762000 | -0.747045000 | 1.451909000  |
| 6  | -0.585034000 | -0.871593000 | 1.993587000  |
| 6  | 0.047569000  | -2.892460000 | -3.030830000 |
| 6  | 0.772744000  | -3.933943000 | -2.439133000 |
| 6  | 1.369545000  | -3.754989000 | -1.177676000 |
| 1  | -0.444569000 | -3.014979000 | -3.989734000 |



|   |              |              |              |
|---|--------------|--------------|--------------|
| 1 | 1.905520000  | -4.575895000 | -0.716171000 |
| 6 | -0.968742000 | -0.593660000 | -2.861247000 |
| 8 | -1.422350000 | -0.555148000 | -4.047294000 |
| 8 | -1.289126000 | 0.323877000  | -1.943035000 |
| 6 | 1.316649000  | 0.755884000  | 2.732122000  |
| 6 | 2.134406000  | -0.272597000 | 3.248492000  |
| 6 | 1.813265000  | 2.079511000  | 2.726490000  |
| 6 | 3.413929000  | 0.011342000  | 3.739557000  |
| 6 | 3.092079000  | 2.362549000  | 3.219743000  |
| 6 | 3.899952000  | 1.329555000  | 3.726614000  |
| 1 | 1.768780000  | -1.293208000 | 3.260751000  |
| 1 | 1.202565000  | 2.885402000  | 2.331996000  |
| 1 | 4.030504000  | -0.791366000 | 4.127415000  |
| 1 | 3.457792000  | 3.382310000  | 3.206993000  |
| 1 | 4.891178000  | 1.548055000  | 4.105560000  |
| 6 | -2.813812000 | -1.874210000 | 1.203451000  |
| 6 | -4.175399000 | -1.803354000 | 1.568514000  |
| 6 | -2.321377000 | -3.069329000 | 0.634212000  |
| 6 | -5.025009000 | -2.896799000 | 1.353303000  |
| 6 | -3.170666000 | -4.161675000 | 0.422369000  |
| 6 | -4.528008000 | -4.078211000 | 0.777848000  |
| 1 | -4.563376000 | -0.895810000 | 2.019105000  |
| 1 | -1.275503000 | -3.125722000 | 0.340058000  |
| 1 | -6.068844000 | -2.830513000 | 1.636994000  |
| 1 | -2.778528000 | -5.069331000 | -0.022163000 |
| 1 | -5.188855000 | -4.920106000 | 0.608381000  |
| 6 | -3.343690000 | 1.328766000  | 0.697314000  |
| 6 | -3.802863000 | 2.574026000  | 1.180628000  |
| 6 | -4.023219000 | 0.718869000  | -0.380366000 |
| 6 | -4.926897000 | 3.185227000  | 0.608959000  |
| 6 | -5.141299000 | 1.333787000  | -0.952739000 |
| 6 | -5.600941000 | 2.566782000  | -0.457528000 |
| 1 | -3.288985000 | 3.052237000  | 2.008153000  |
| 1 | -3.650619000 | -0.216863000 | -0.782699000 |
| 1 | -5.276982000 | 4.135492000  | 0.994043000  |
| 1 | -5.649275000 | 0.857502000  | -1.782734000 |
| 1 | -6.468346000 | 3.041608000  | -0.900473000 |
| 1 | -0.911481000 | 2.481360000  | 1.795391000  |
| 1 | -0.097704000 | -1.805940000 | 2.225544000  |
| 6 | 1.670864000  | 0.200145000  | -1.031865000 |
| 6 | 0.990757000  | 1.318169000  | -0.990167000 |
| 6 | 3.065261000  | -0.237158000 | -0.960202000 |
| 6 | 3.590752000  | -1.150555000 | -1.898367000 |
| 6 | 3.914302000  | 0.313927000  | 0.025133000  |
| 6 | 4.945817000  | -1.501973000 | -1.855762000 |
| 6 | 5.266410000  | -0.050529000 | 0.071578000  |
| 6 | 5.785889000  | -0.958059000 | -0.868392000 |
| 1 | 2.937922000  | -1.565414000 | -2.659863000 |
| 1 | 3.503587000  | 1.013382000  | 0.749359000  |
| 1 | 5.345160000  | -2.196069000 | -2.585678000 |
| 1 | 5.910411000  | 0.369518000  | 0.835915000  |
| 1 | 6.832441000  | -1.236980000 | -0.833931000 |
| 6 | 0.966427000  | 2.723061000  | -1.293371000 |

|   |              |              |              |
|---|--------------|--------------|--------------|
| 6 | 2.081416000  | 3.333340000  | -1.926209000 |
| 6 | -0.153628000 | 3.521584000  | -0.961880000 |
| 6 | 2.071085000  | 4.705724000  | -2.196327000 |
| 6 | -0.155646000 | 4.893770000  | -1.233650000 |
| 6 | 0.957404000  | 5.492355000  | -1.848560000 |
| 1 | 2.941153000  | 2.729334000  | -2.195485000 |
| 1 | -1.016064000 | 3.044574000  | -0.503400000 |
| 1 | 2.927186000  | 5.164800000  | -2.676650000 |
| 1 | -1.020032000 | 5.492624000  | -0.972207000 |
| 1 | 0.956520000  | 6.554689000  | -2.061390000 |
| 1 | 0.868378000  | -4.889840000 | -2.939401000 |
| 8 | 1.844647000  | -2.265465000 | 0.716690000  |
| 6 | 2.855629000  | -3.209531000 | 1.195793000  |
| 1 | 2.394772000  | -4.156264000 | 1.488212000  |
| 1 | 3.612476000  | -3.380880000 | 0.424110000  |
| 1 | 3.308615000  | -2.728273000 | 2.060129000  |

**TS'2\_T\_CpPh3;** Gibbs free energy ... -2068.81347656 Eh

|    |              |              |              |
|----|--------------|--------------|--------------|
| 45 | 0.276483000  | -0.200553000 | 0.144111000  |
| 6  | -0.960385000 | 1.393579000  | -0.444471000 |
| 6  | -0.411839000 | 2.106142000  | -1.538106000 |
| 6  | -1.815020000 | 2.086671000  | 0.448438000  |
| 6  | 0.083521000  | -1.047862000 | 2.232985000  |
| 6  | 1.148989000  | -1.788153000 | 1.592709000  |
| 6  | 2.189680000  | -0.885792000 | 1.218012000  |
| 6  | 1.807166000  | 0.463823000  | 1.695557000  |
| 6  | 0.527613000  | 0.336318000  | 2.313660000  |
| 6  | -0.744748000 | 3.448862000  | -1.781010000 |
| 6  | -1.591017000 | 4.111994000  | -0.881112000 |
| 6  | -2.110037000 | 3.432037000  | 0.244434000  |
| 1  | -0.297995000 | 3.945108000  | -2.636080000 |
| 1  | -2.745851000 | 3.973778000  | 0.934414000  |
| 6  | 0.626011000  | 1.420499000  | -2.345886000 |
| 8  | 1.027496000  | 1.836639000  | -3.476808000 |
| 8  | 1.136578000  | 0.335191000  | -1.757408000 |
| 6  | -1.173686000 | -1.597537000 | 2.747294000  |
| 6  | -2.132156000 | -0.758243000 | 3.359069000  |
| 6  | -1.461443000 | -2.975535000 | 2.621623000  |
| 6  | -3.341210000 | -1.281818000 | 3.831680000  |
| 6  | -2.671024000 | -3.497436000 | 3.096197000  |
| 6  | -3.616997000 | -2.653275000 | 3.702789000  |
| 1  | -1.931160000 | 0.302244000  | 3.468981000  |
| 1  | -0.741088000 | -3.641548000 | 2.158437000  |
| 1  | -4.065439000 | -0.622362000 | 4.294840000  |
| 1  | -2.874847000 | -4.556547000 | 2.994098000  |
| 1  | -4.553445000 | -3.056675000 | 4.069212000  |
| 6  | 2.576540000  | 1.715851000  | 1.621269000  |
| 6  | 3.959972000  | 1.751101000  | 1.896202000  |
| 6  | 1.912947000  | 2.920974000  | 1.302118000  |
| 6  | 4.661200000  | 2.963602000  | 1.839977000  |
| 6  | 2.614835000  | 4.130331000  | 1.244141000  |
| 6  | 3.994690000  | 4.155816000  | 1.510390000  |
| 1  | 4.482118000  | 0.836437000  | 2.156695000  |

|   |              |              |              |
|---|--------------|--------------|--------------|
| 1 | 0.848457000  | 2.895970000  | 1.079753000  |
| 1 | 5.723053000  | 2.977872000  | 2.055918000  |
| 1 | 2.089399000  | 5.042560000  | 0.984361000  |
| 1 | 4.543469000  | 5.088861000  | 1.462912000  |
| 6 | 3.387156000  | -1.268789000 | 0.457027000  |
| 6 | 3.954516000  | -2.551380000 | 0.631925000  |
| 6 | 3.958350000  | -0.392986000 | -0.492964000 |
| 6 | 5.070576000  | -2.943460000 | -0.119747000 |
| 6 | 5.071839000  | -0.788046000 | -1.242960000 |
| 6 | 5.633931000  | -2.063302000 | -1.058957000 |
| 1 | 3.529544000  | -3.233054000 | 1.361509000  |
| 1 | 3.506808000  | 0.577182000  | -0.664274000 |
| 1 | 5.499293000  | -3.927512000 | 0.027696000  |
| 1 | 5.493435000  | -0.107581000 | -1.973050000 |
| 1 | 6.496245000  | -2.366491000 | -1.640702000 |
| 1 | 1.135392000  | -2.843410000 | 1.362759000  |
| 1 | -0.013872000 | 1.148613000  | 2.776231000  |
| 6 | -1.732044000 | -0.421319000 | -0.883009000 |
| 6 | -0.839935000 | -1.335302000 | -1.167803000 |
| 6 | -3.173022000 | -0.329711000 | -0.658711000 |
| 6 | -3.948454000 | 0.699265000  | -1.235158000 |
| 6 | -3.811361000 | -1.339422000 | 0.097689000  |
| 6 | -5.337582000 | 0.712780000  | -1.065469000 |
| 6 | -5.201279000 | -1.314886000 | 0.272955000  |
| 6 | -5.967371000 | -0.291207000 | -0.307965000 |
| 1 | -3.458055000 | 1.471786000  | -1.818512000 |
| 1 | -3.211569000 | -2.127787000 | 0.544358000  |
| 1 | -5.926295000 | 1.499392000  | -1.522021000 |
| 1 | -5.682955000 | -2.090144000 | 0.857697000  |
| 1 | -7.042462000 | -0.274668000 | -0.173897000 |
| 6 | -0.508080000 | -2.528476000 | -1.894202000 |
| 6 | -1.438725000 | -3.085894000 | -2.810357000 |
| 6 | 0.743421000  | -3.164669000 | -1.715813000 |
| 6 | -1.118479000 | -4.251250000 | -3.514717000 |
| 6 | 1.054723000  | -4.331645000 | -2.421702000 |
| 6 | 0.125888000  | -4.879824000 | -3.323893000 |
| 1 | -2.398121000 | -2.601898000 | -2.957773000 |
| 1 | 1.463566000  | -2.721462000 | -1.032093000 |
| 1 | -1.834275000 | -4.669195000 | -4.212659000 |
| 1 | 2.018557000  | -4.806357000 | -2.278472000 |
| 1 | 0.370597000  | -5.778696000 | -3.876852000 |
| 1 | -2.253715000 | 1.567094000  | 1.294580000  |
| 8 | -1.967049000 | 5.445748000  | -0.999106000 |
| 6 | -1.433727000 | 6.194138000  | -2.139089000 |
| 1 | -1.847021000 | 7.193413000  | -2.040566000 |
| 1 | -0.341897000 | 6.230690000  | -2.097973000 |
| 1 | -1.756551000 | 5.742943000  | -3.080961000 |

TS2\_H\_CpPh3; Gibbs free energy ... -1764.07618999 Eh

|    |              |              |              |
|----|--------------|--------------|--------------|
| 45 | 0.205063000  | -0.305697000 | 0.301306000  |
| 6  | 0.285037000  | 1.735443000  | 0.843733000  |
| 6  | -0.476945000 | 2.004370000  | 2.011517000  |
| 6  | 0.464154000  | 2.800484000  | -0.081599000 |

|   |              |              |              |
|---|--------------|--------------|--------------|
| 6 | 0.875737000  | -1.492300000 | -1.492508000 |
| 6 | 0.015925000  | -2.336483000 | -0.708359000 |
| 6 | -1.301358000 | -1.723229000 | -0.654621000 |
| 6 | -1.286419000 | -0.525531000 | -1.481519000 |
| 6 | 0.072773000  | -0.357162000 | -1.920704000 |
| 6 | -0.965968000 | 3.289317000  | 2.291487000  |
| 6 | -0.737854000 | 4.328810000  | 1.380682000  |
| 6 | -0.037387000 | 4.083614000  | 0.186456000  |
| 1 | -1.537534000 | 3.448782000  | 3.199309000  |
| 1 | 0.103407000  | 4.888125000  | -0.525662000 |
| 6 | -0.811752000 | 0.839693000  | 2.870550000  |
| 8 | -1.285775000 | 0.947875000  | 4.045709000  |
| 8 | -0.610329000 | -0.345022000 | 2.288904000  |
| 6 | 1.982824000  | 0.878711000  | 1.240602000  |
| 6 | 1.931866000  | -0.405493000 | 1.438900000  |
| 6 | 2.464205000  | -1.679893000 | 1.972405000  |
| 1 | 1.726939000  | -2.083578000 | 2.677028000  |
| 1 | 2.512899000  | -2.400322000 | 1.145352000  |
| 6 | 2.951834000  | 2.026674000  | 1.200721000  |
| 1 | 2.558704000  | 2.841123000  | 1.821197000  |
| 1 | 2.996301000  | 2.410628000  | 0.176429000  |
| 6 | 4.353946000  | 1.622336000  | 1.663589000  |
| 1 | 5.013943000  | 2.492213000  | 1.631023000  |
| 1 | 4.341199000  | 1.240756000  | 2.687165000  |
| 1 | 4.773776000  | 0.847476000  | 1.015228000  |
| 6 | 3.838081000  | -1.583333000 | 2.652668000  |
| 1 | 3.814033000  | -0.894661000 | 3.500913000  |
| 1 | 4.132383000  | -2.569573000 | 3.019272000  |
| 1 | 4.602559000  | -1.236901000 | 1.952317000  |
| 6 | 2.305559000  | -1.669385000 | -1.762961000 |
| 6 | 3.102835000  | -0.550057000 | -2.095712000 |
| 6 | 2.915161000  | -2.938764000 | -1.670451000 |
| 6 | 4.472166000  | -0.699839000 | -2.338040000 |
| 6 | 4.288002000  | -3.086168000 | -1.912616000 |
| 6 | 5.071564000  | -1.969391000 | -2.248775000 |
| 1 | 2.647599000  | 0.436598000  | -2.136833000 |
| 1 | 2.314768000  | -3.806202000 | -1.415995000 |
| 1 | 5.072071000  | 0.167407000  | -2.588105000 |
| 1 | 4.743540000  | -4.066401000 | -1.836392000 |
| 1 | 6.132903000  | -2.085190000 | -2.433227000 |
| 6 | -2.395232000 | 0.359605000  | -1.863928000 |
| 6 | -3.710937000 | -0.122307000 | -2.042378000 |
| 6 | -2.135111000 | 1.723704000  | -2.128280000 |
| 6 | -4.737406000 | 0.742911000  | -2.444488000 |
| 6 | -3.160239000 | 2.586229000  | -2.532216000 |
| 6 | -4.470214000 | 2.101332000  | -2.686364000 |
| 1 | -3.927667000 | -1.171452000 | -1.872661000 |
| 1 | -1.123913000 | 2.098382000  | -2.007823000 |
| 1 | -5.740815000 | 0.354968000  | -2.576263000 |
| 1 | -2.938756000 | 3.630697000  | -2.723226000 |
| 1 | -5.267804000 | 2.766540000  | -2.995646000 |
| 6 | -2.415593000 | -2.242393000 | 0.151252000  |
| 6 | -2.629120000 | -3.632656000 | 0.250447000  |

|   |              |              |              |
|---|--------------|--------------|--------------|
| 6 | -3.262779000 | -1.363657000 | 0.861972000  |
| 6 | -3.685651000 | -4.134200000 | 1.023573000  |
| 6 | -4.312075000 | -1.865662000 | 1.637339000  |
| 6 | -4.530645000 | -3.253117000 | 1.716808000  |
| 1 | -1.980194000 | -4.313132000 | -0.291053000 |
| 1 | -3.075455000 | -0.294515000 | 0.817608000  |
| 1 | -3.846970000 | -5.203813000 | 1.085038000  |
| 1 | -4.950679000 | -1.184002000 | 2.186459000  |
| 1 | -5.344809000 | -3.640207000 | 2.318037000  |
| 8 | 1.156282000  | 2.481189000  | -1.249143000 |
| 6 | 1.442719000  | 3.562450000  | -2.193987000 |
| 1 | 0.513010000  | 3.986735000  | -2.585427000 |
| 1 | 2.039132000  | 4.345068000  | -1.716596000 |
| 1 | 2.004890000  | 3.092194000  | -2.996726000 |
| 1 | -1.117227000 | 5.323915000  | 1.577863000  |
| 1 | 0.299173000  | -3.243452000 | -0.194225000 |
| 1 | 0.420100000  | 0.444760000  | -2.554342000 |

**TS'2\_H\_CpPh3; Gibbs free energy** ... -1764.06959367 Eh

|    |              |              |              |
|----|--------------|--------------|--------------|
| 45 | 0.487782000  | -0.176536000 | 0.255871000  |
| 6  | -0.388688000 | 1.748133000  | 0.321087000  |
| 6  | -1.240563000 | 1.882081000  | 1.453483000  |
| 6  | -0.667235000 | 2.542816000  | -0.812101000 |
| 6  | 1.698089000  | -1.287593000 | -1.279756000 |
| 6  | 1.262288000  | -2.245988000 | -0.301684000 |
| 6  | -0.188251000 | -2.292500000 | -0.316408000 |
| 6  | -0.666487000 | -1.414154000 | -1.373274000 |
| 6  | 0.494186000  | -0.735824000 | -1.890901000 |
| 6  | -2.284272000 | 2.808405000  | 1.472633000  |
| 6  | -2.531406000 | 3.598161000  | 0.336894000  |
| 6  | -1.733205000 | 3.451281000  | -0.816171000 |
| 1  | -2.920388000 | 2.885849000  | 2.348000000  |
| 1  | -1.932988000 | 4.033478000  | -1.707811000 |
| 6  | -1.045962000 | 0.923912000  | 2.571695000  |
| 8  | -1.569224000 | 1.071570000  | 3.720507000  |
| 8  | -0.298418000 | -0.133457000 | 2.253923000  |
| 6  | 1.529947000  | 1.827174000  | 0.769547000  |
| 6  | 2.033065000  | 0.743132000  | 1.281467000  |
| 6  | 3.036195000  | -0.005019000 | 2.072776000  |
| 1  | 2.510101000  | -0.527777000 | 2.880616000  |
| 1  | 3.456742000  | -0.791886000 | 1.432047000  |
| 6  | 1.914305000  | 3.210982000  | 0.332920000  |
| 1  | 1.179013000  | 3.926985000  | 0.717537000  |
| 1  | 1.847651000  | 3.262252000  | -0.759714000 |
| 6  | 3.327377000  | 3.593744000  | 0.781451000  |
| 1  | 3.558173000  | 4.606430000  | 0.443413000  |
| 1  | 3.417959000  | 3.567208000  | 1.869851000  |
| 1  | 4.072073000  | 2.911915000  | 0.361210000  |
| 6  | 4.171873000  | 0.849834000  | 2.654069000  |
| 1  | 3.781344000  | 1.639987000  | 3.300351000  |
| 1  | 4.836277000  | 0.217829000  | 3.247904000  |
| 1  | 4.760518000  | 1.316852000  | 1.860205000  |
| 6  | 3.081408000  | -0.897975000 | -1.568150000 |

|   |              |              |              |
|---|--------------|--------------|--------------|
| 6 | 3.367156000  | 0.309297000  | -2.243860000 |
| 6 | 4.155123000  | -1.713164000 | -1.148255000 |
| 6 | 4.690851000  | 0.690673000  | -2.490847000 |
| 6 | 5.479490000  | -1.331003000 | -1.397641000 |
| 6 | 5.753492000  | -0.127382000 | -2.068294000 |
| 1 | 2.552583000  | 0.955329000  | -2.559052000 |
| 1 | 3.951536000  | -2.648545000 | -0.637262000 |
| 1 | 4.894340000  | 1.623250000  | -3.003802000 |
| 1 | 6.293875000  | -1.968191000 | -1.073880000 |
| 1 | 6.778101000  | 0.167318000  | -2.261217000 |
| 6 | -2.032085000 | -1.273647000 | -1.899005000 |
| 6 | -2.903840000 | -2.384699000 | -1.956107000 |
| 6 | -2.478626000 | -0.039823000 | -2.422716000 |
| 6 | -4.192082000 | -2.255833000 | -2.491137000 |
| 6 | -3.767636000 | 0.088951000  | -2.954917000 |
| 6 | -4.633752000 | -1.017153000 | -2.986897000 |
| 1 | -2.566922000 | -3.348132000 | -1.588737000 |
| 1 | -1.816952000 | 0.820045000  | -2.401227000 |
| 1 | -4.845349000 | -3.119931000 | -2.525281000 |
| 1 | -4.096820000 | 1.047577000  | -3.340111000 |
| 1 | -5.630979000 | -0.916565000 | -3.398743000 |
| 6 | -0.987901000 | -3.084174000 | 0.630272000  |
| 6 | -0.516388000 | -4.336072000 | 1.078686000  |
| 6 | -2.212197000 | -2.592818000 | 1.137300000  |
| 6 | -1.264119000 | -5.091487000 | 1.992709000  |
| 6 | -2.955368000 | -3.345940000 | 2.051060000  |
| 6 | -2.486691000 | -4.601071000 | 2.479677000  |
| 1 | 0.423933000  | -4.722417000 | 0.699275000  |
| 1 | -2.565216000 | -1.614501000 | 0.824655000  |
| 1 | -0.894586000 | -6.054266000 | 2.324840000  |
| 1 | -3.890374000 | -2.955540000 | 2.434862000  |
| 1 | -3.064233000 | -5.184618000 | 3.186731000  |
| 1 | 1.892852000  | -2.813218000 | 0.367156000  |
| 1 | 0.477476000  | -0.024384000 | -2.704517000 |
| 1 | -0.043815000 | 2.459164000  | -1.697762000 |
| 8 | -3.596864000 | 4.488790000  | 0.437487000  |
| 6 | -3.887383000 | 5.323014000  | -0.729139000 |
| 1 | -4.153525000 | 4.703776000  | -1.590078000 |
| 1 | -4.732733000 | 5.938756000  | -0.436866000 |
| 1 | -3.028346000 | 5.952209000  | -0.977121000 |

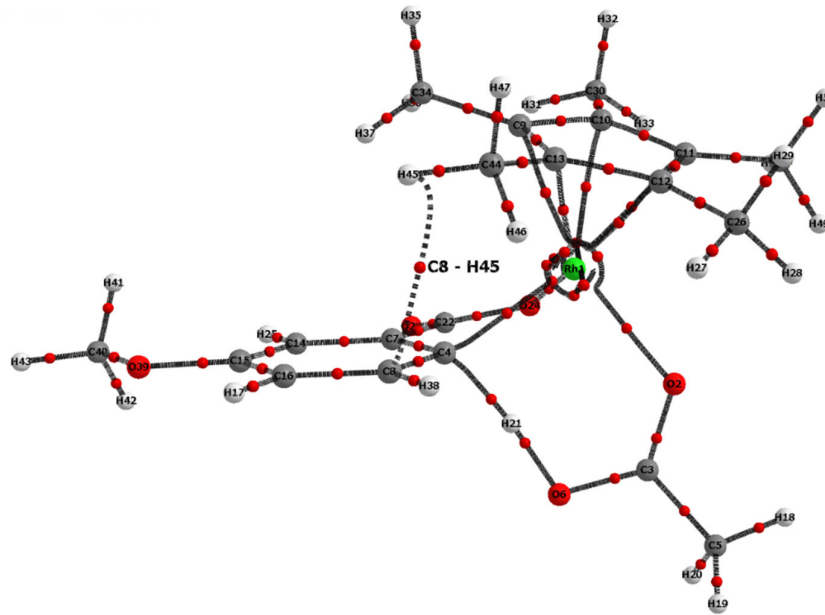

| Transition state | BCP    | $q(r)$   | $\nabla^2 q(r)$ | $H(r)$   |
|------------------|--------|----------|-----------------|----------|
| <b>TS'0_Cp*</b>  | C8-H45 | 0.006939 | 0.028227        | 0.001633 |

**Figure S7.** Theoretical molecular graph and calculated parameters of the electron density distribution at the selected bond critical points for **TS'0\_Cp\***.

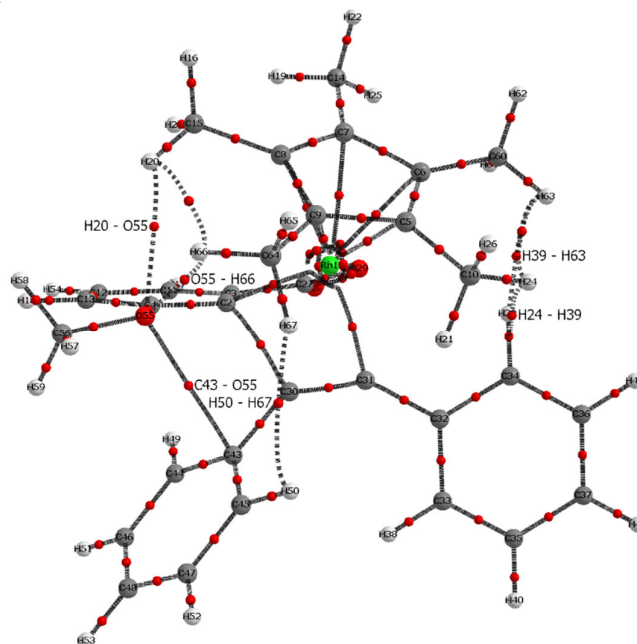

| Transition state | BCP     | $q(r)$   | $\nabla^2 q(r)$ | $H(r)$   |
|------------------|---------|----------|-----------------|----------|
| <b>TS1_T_Cp*</b> | H20-O55 | 0.008827 | 0.037122        | 0.001937 |
|                  | O55-H66 | 0.009232 | 0.042551        | 0.002365 |
|                  | C43-O55 | 0.011001 | 0.045354        | 0.001850 |
|                  | H50-H67 | 0.001244 | 0.004750        | 0.000355 |
|                  | H24-H39 | 0.005043 | 0.021054        | 0.001531 |
|                  | H39-H63 | 0.007741 | 0.034178        | 0.002156 |

**Figure S8.** Theoretical molecular graph and calculated parameters of the electron density distribution at the selected bond critical points for **TS1\_T\_Cp\***.

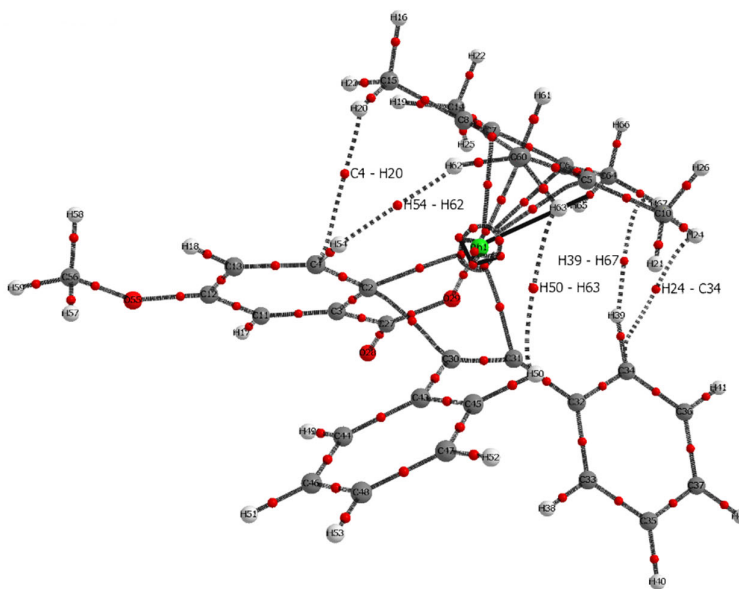

| Transition state | BCP     | $\rho(r)$ | $\nabla^2\rho(r)$ | $H(r)$   |
|------------------|---------|-----------|-------------------|----------|
| TS'1_T_Cp*       | C4-H20  | 0.007507  | 0.029983          | 0.001857 |
|                  | H54-H62 | 0.003609  | 0.015923          | 0.001248 |
|                  | H50-H63 | 0.002523  | 0.010905          | 0.000883 |
|                  | H39-H67 | 0.007371  | 0.032628          | 0.002030 |
|                  | H24-C34 | 0.004784  | 0.019581          | 0.001397 |

**Figure S9.** Theoretical molecular graph and calculated parameters of the electron density distribution at the selected bond critical points for TS'1\_T\_Cp\*.

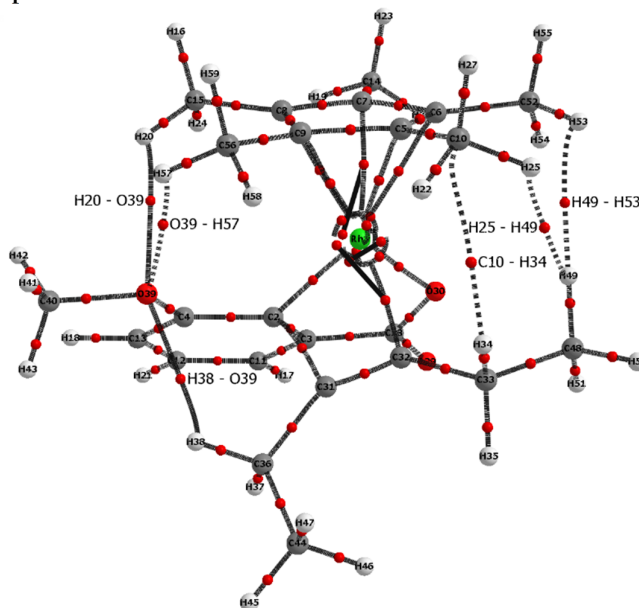

| Transition state | BCP     | $\rho(r)$ | $\nabla^2\rho(r)$ | $H(r)$   |
|------------------|---------|-----------|-------------------|----------|
| TS1_H_Cp*        | H20-O39 | 0.011231  | 0.047304          | 0.002195 |
|                  | O39-H57 | 0.009630  | 0.042898          | 0.002254 |
|                  | H38-O39 | 0.012681  | 0.056070          | 0.002542 |
|                  | C10-H34 | 0.006047  | 0.026452          | 0.001762 |
|                  | H25-H49 | 0.004357  | 0.019183          | 0.001445 |
|                  | H49-H53 | 0.006121  | 0.025983          | 0.001789 |

**Figure S10.** Theoretical molecular graph and calculated parameters of the electron density distribution at the selected bond critical points for TS1\_H\_Cp\*.



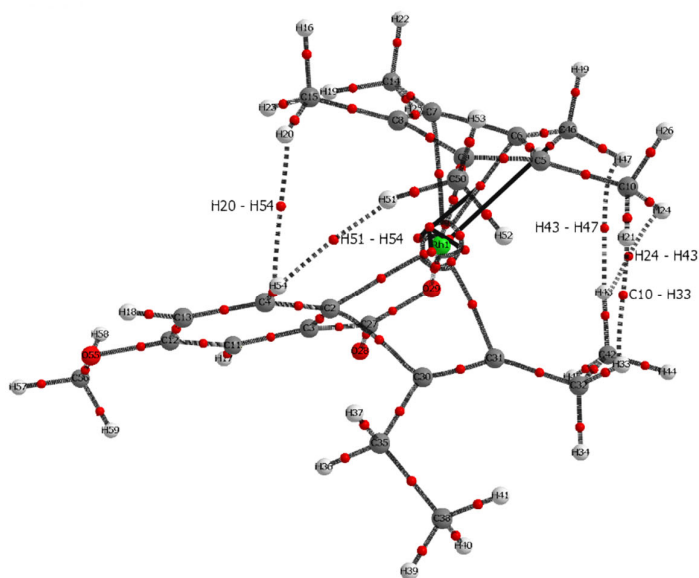

| Transition state  | BCP     | $\rho(r)$ | $\nabla^2\rho(r)$ | $H(r)$   |
|-------------------|---------|-----------|-------------------|----------|
| <b>TS'1_H_Cp*</b> | H20-H54 | 0.006785  | 0.029246          | 0.002013 |
|                   | H51-H54 | 0.003051  | 0.013174          | 0.001033 |
|                   | H43-H47 | 0.005645  | 0.023982          | 0.001690 |
|                   | H24-H43 | 0.003473  | 0.014989          | 0.001144 |
|                   | C10-H33 | 0.005341  | 0.023619          | 0.001636 |

**Figure S11.** Theoretical molecular graph and calculated parameters of the electron density distribution at the selected bond critical points for **TS'1\_H\_Cp\***.

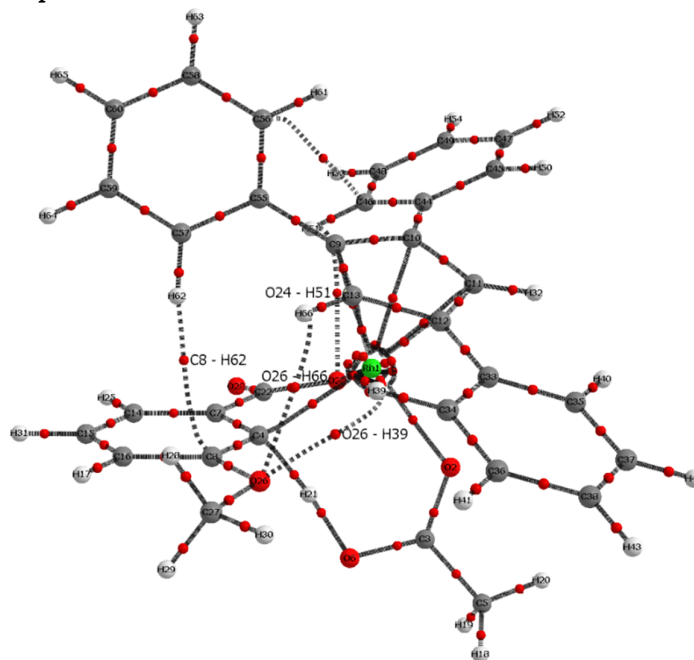

| Transition state | BCP     | $\rho(r)$ | $\nabla^2\rho(r)$ | $H(r)$   |
|------------------|---------|-----------|-------------------|----------|
| <b>TS0_CpPh3</b> | O26-H39 | 0.004922  | 0.021351          | 0.001313 |
|                  | O26-H66 | 0.007092  | 0.031068          | 0.001750 |
|                  | C8-H62  | 0.008363  | 0.033072          | 0.001894 |
|                  | O24-H51 | 0.006970  | 0.028554          | 0.001550 |

**Figure S12.** Theoretical molecular graph and calculated parameters of the electron density distribution at the selected bond critical points for **TS0\_CpPh3**.

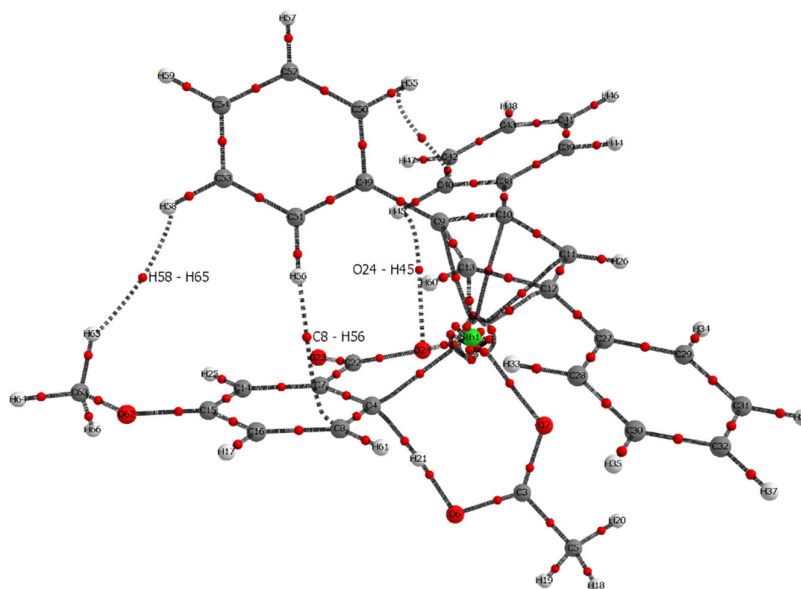

| Transition state  | BCP     | $q(r)$   | $\nabla^2 q(r)$ | $H(r)$   |
|-------------------|---------|----------|-----------------|----------|
| <b>TS'0_CpPh3</b> | H58-H65 | 0.000887 | 0.003478        | 0.000245 |
|                   | C8-H56  | 0.008206 | 0.032427        | 0.001879 |
|                   | O24-H45 | 0.007440 | 0.030992        | 0.001712 |

**Figure S13.** Theoretical molecular graph and calculated parameters of the electron density distribution at the selected bond critical points for **TS'0\_CpPh3**.

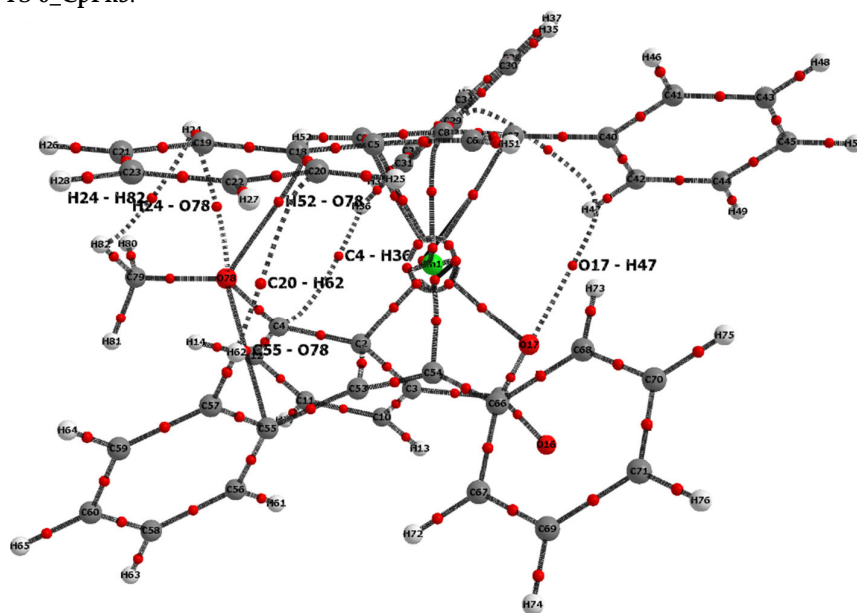

| Transition state   | BCP     | $q(r)$   | $\nabla^2 q(r)$ | $H(r)$   |
|--------------------|---------|----------|-----------------|----------|
| <b>TS1_T_CpPh3</b> | H24-H82 | 0.004666 | 0.023221        | 0.001758 |
|                    | H24-O78 | 0.006065 | 0.027049        | 0.001638 |
|                    | H52-O78 | 0.010019 | 0.044881        | 0.002443 |
|                    | C20-H62 | 0.005893 | 0.023170        | 0.001552 |
|                    | C55-O78 | 0.011279 | 0.045225        | 0.001774 |
|                    | O17-H47 | 0.007289 | 0.031270        | 0.001786 |
|                    | C4-H36  | 0.006244 | 0.024173        | 0.001549 |

**Figure S14.** Theoretical molecular graph and calculated parameters of the electron density distribution at the selected bond critical points for **TS1\_T\_CpPh3**.

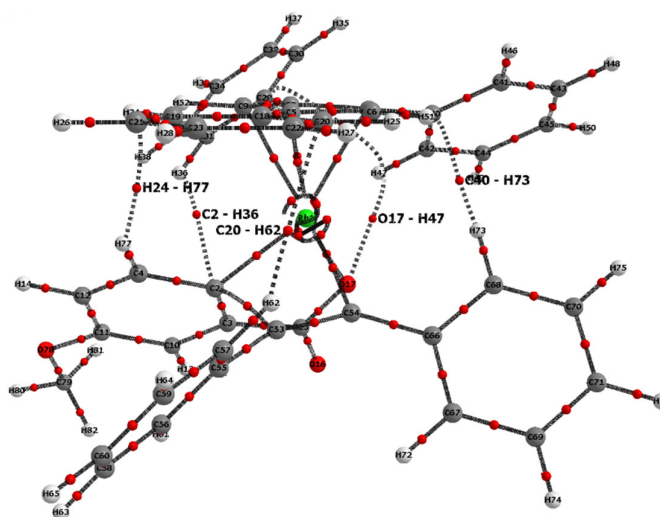

| Transition state | BCP     | $\rho(r)$ | $\nabla^2\rho(r)$ | $H(r)$   |
|------------------|---------|-----------|-------------------|----------|
| TS'1_T_CpPh3     | H24-H77 | 0.003201  | 0.014040          | 0.001118 |
|                  | C2-H36  | 0.006370  | 0.024513          | 0.001516 |
|                  | C20-H62 | 0.005384  | 0.020862          | 0.001440 |
|                  | O17-H47 | 0.007762  | 0.034018          | 0.001975 |
|                  | C40-H73 | 0.005205  | 0.020246          | 0.001344 |

**Figure S15.** Theoretical molecular graph and calculated parameters of the electron density distribution at the selected bond critical points for TS'1\_T\_CpPh3.

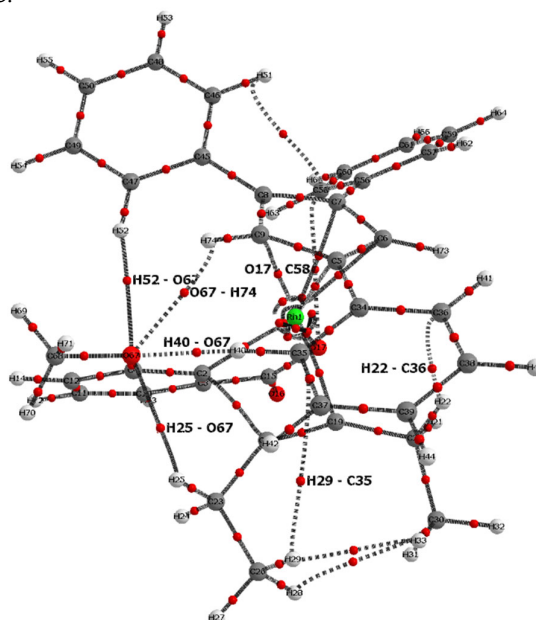

| Transition state | BCP     | $\rho(r)$ | $\nabla^2\rho(r)$ | $H(r)$   |
|------------------|---------|-----------|-------------------|----------|
| TS1_H_CpPh3      | H52-O67 | 0.010045  | 0.042164          | 0.001926 |
|                  | O67-H74 | 0.009588  | 0.042864          | 0.002351 |
|                  | H40-O67 | 0.005403  | 0.022824          | 0.001346 |
|                  | H25-O67 | 0.013987  | 0.061229          | 0.002605 |
|                  | H29-C35 | 0.001084  | 0.003371          | 0.000224 |
|                  | H22-C36 | 0.004925  | 0.018255          | 0.001272 |
|                  | O17-C58 | 0.006725  | 0.026234          | 0.001248 |

**Figure S16.** Theoretical molecular graph and calculated parameters of the electron density distribution at the selected bond critical points for TS1\_H\_CpPh3.

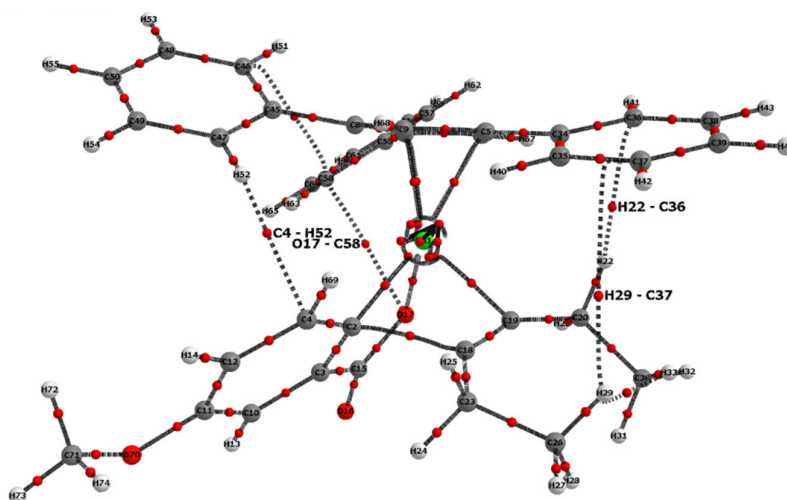

| Transition state | BCP     | $\rho(r)$ | $\nabla^2\rho(r)$ | $H(r)$   |
|------------------|---------|-----------|-------------------|----------|
| TS'1_H_CpPh3     | C4-H52  | 0.008057  | 0.029722          | 0.001567 |
|                  | O17-C58 | 0.005220  | 0.020289          | 0.000998 |
|                  | H22-C36 | 0.005463  | 0.019914          | 0.001305 |
|                  | H29-C37 | 0.001167  | 0.003679          | 0.000250 |

**Figure S17.** Theoretical molecular graph and calculated parameters of the electron density distribution at the selected bond critical points for TS'1\_H\_CpPh3.

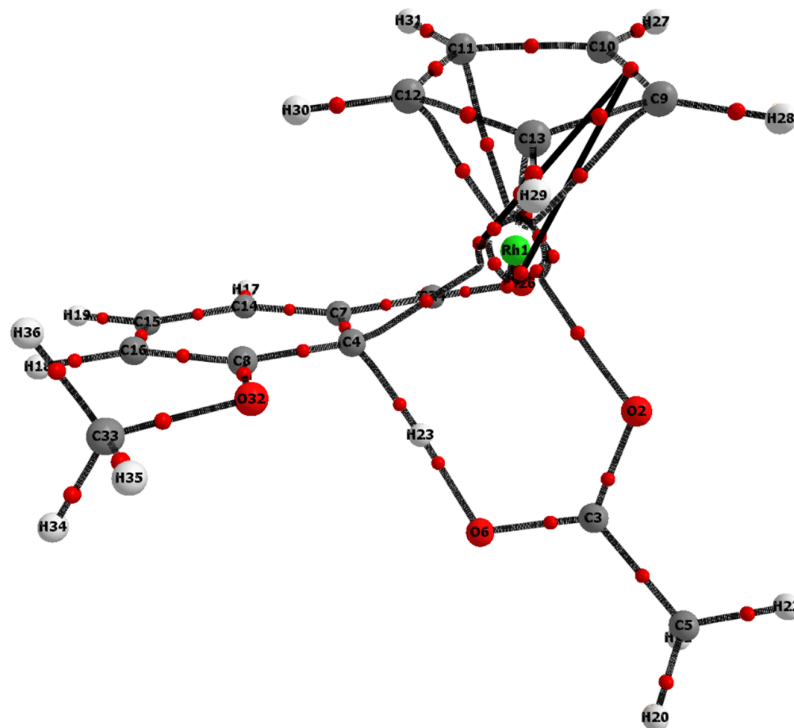

**Figure S18.** Theoretical molecular graph for TS0\_Cp. No bond critical points between the methoxy group and the Cp ligand were found.

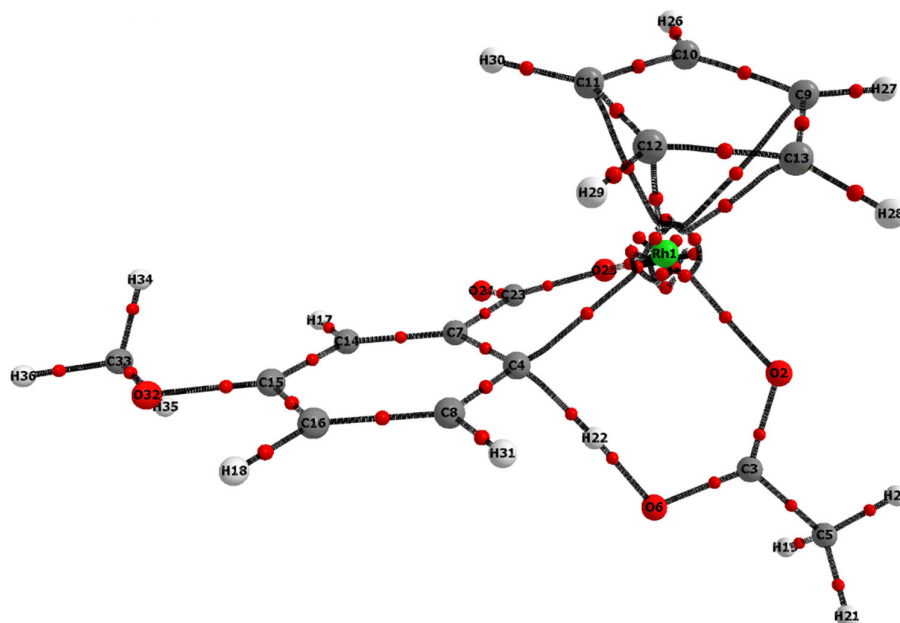

**Figure S19.** Theoretical molecular graph for TS'0\_Cp. No bond critical points between the methoxy group and the Cp ligand were found.

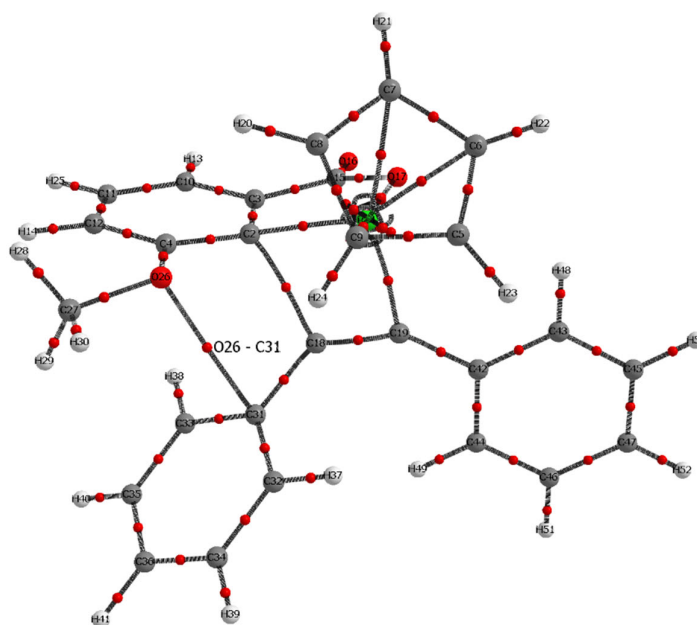

| Transition state | BCP     | $\rho(r)$ | $\nabla^2\rho(r)$ | $H(r)$   |
|------------------|---------|-----------|-------------------|----------|
| <b>TS1_T_Cp</b>  | O26-C31 | 0.010373  | 0.041631          | 0.001703 |

**Figure S20.** Theoretical molecular graph and calculated parameters of the electron density distribution at the selected bond critical points for TS1\_T\_Cp.

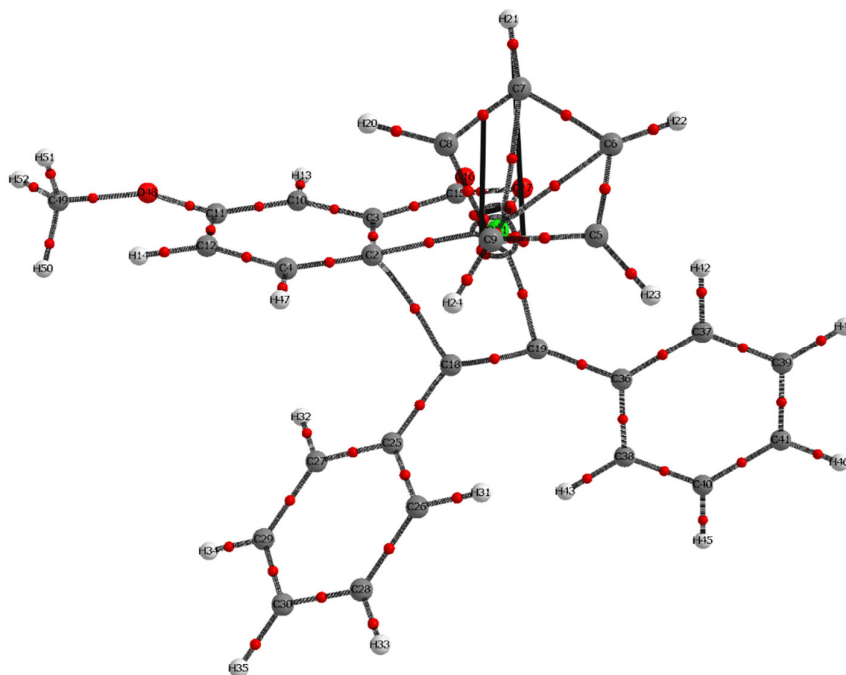

**Figure S21.** Theoretical molecular graph for **TS'1\_T\_Cp**. No bond critical points between the methoxy group or the alkyne moiety and the Cp ligand were found.

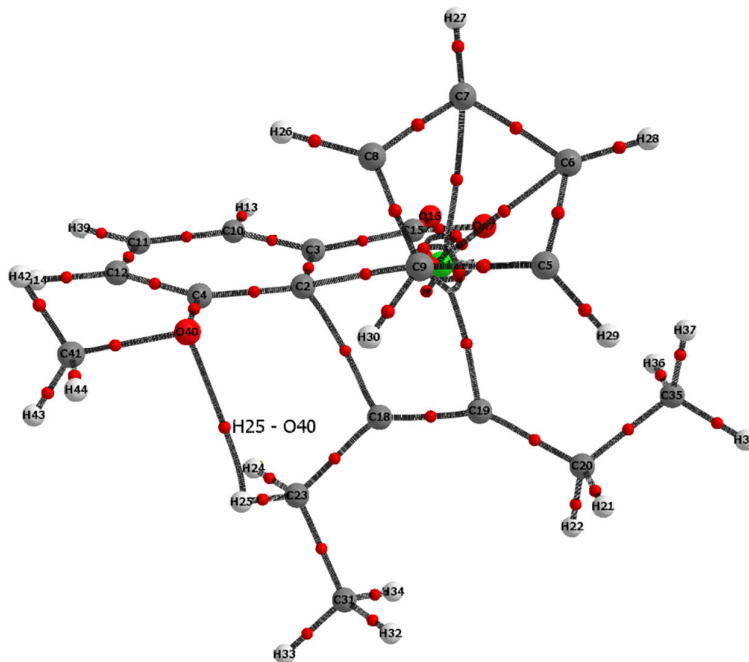

| Transition state | BCP     | $\rho(r)$ | $\nabla^2\rho(r)$ | $H(r)$   |
|------------------|---------|-----------|-------------------|----------|
| <b>TS1_H_Cp</b>  | H25-O40 | 0.010740  | 0.047124          | 0.002330 |

**Figure S22.** Theoretical molecular graph and calculated parameters of the electron density distribution at the selected bond critical points for **TS1\_H\_Cp**.

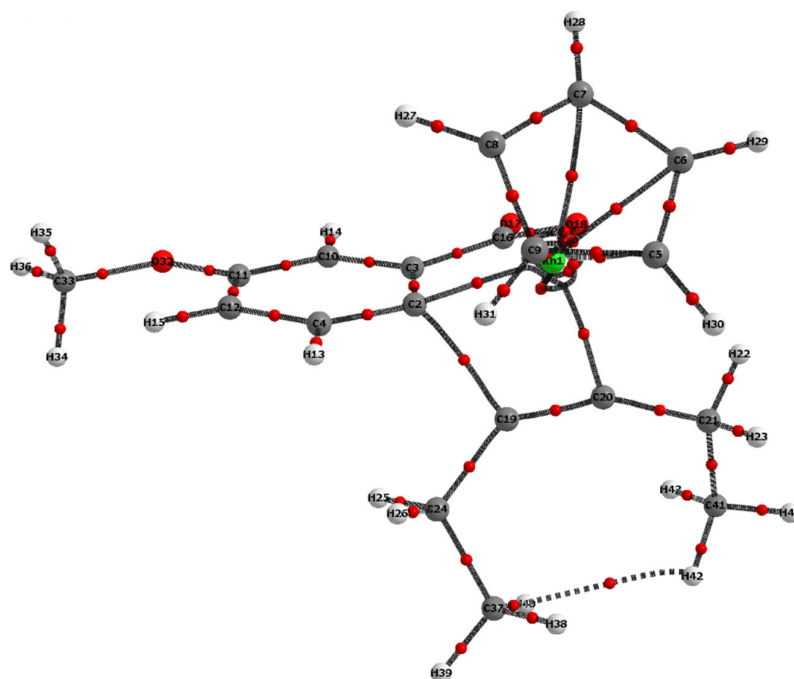

**Figure S23.** Theoretical molecular graph for TS'1\_H\_Cp. No bond critical points between the methoxy group or the alkyne moiety and the Cp ligand were found.

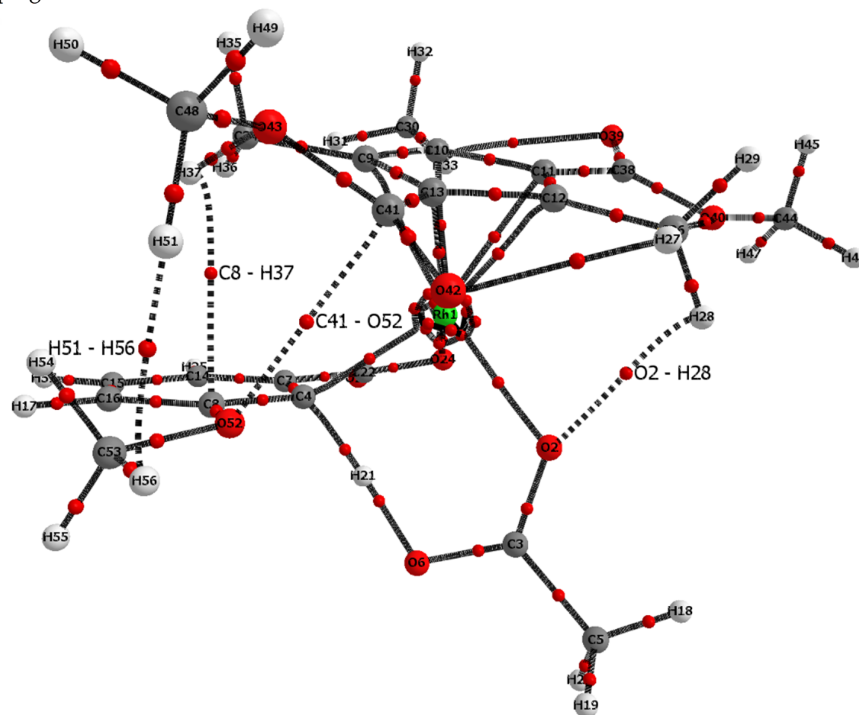

| Transition state | BCP     | $\rho(r)$ | $\nabla^2\rho(r)$ | $H(r)$   |
|------------------|---------|-----------|-------------------|----------|
| TS0_CpE          | H51-H56 | 0.005136  | 0.024682          | 0.001842 |
|                  | C8-H37  | 0.006510  | 0.026892          | 0.001652 |
|                  | C41-O52 | 0.008280  | 0.033407          | 0.001423 |
|                  | O2-H28  | 0.007081  | 0.033539          | 0.002057 |

**Figure S24.** Theoretical molecular graph and calculated parameters of the electron density distribution at the selected bond critical points for TS0\_CpE.

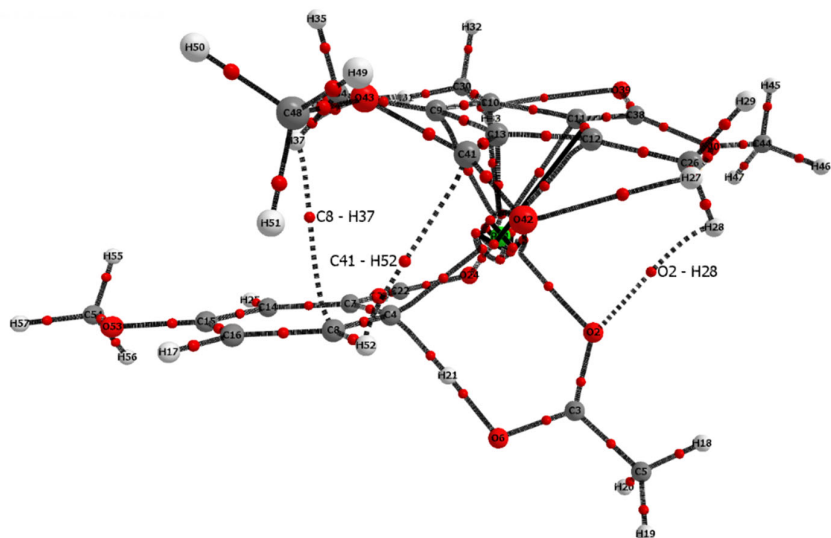

| Transition state | BCP     | $\rho(r)$ | $\nabla^2\rho(r)$ | $H(r)$   |
|------------------|---------|-----------|-------------------|----------|
| TS'0_CpE         | O2-H28  | 0.006141  | 0.028961          | 0.001778 |
|                  | C8-H37  | 0.006773  | 0.026222          | 0.001674 |
|                  | C41-H52 | 0.006378  | 0.027669          | 0.001683 |

**Figure S25.** Theoretical molecular graph and calculated parameters of the electron density distribution at the selected bond critical points for TS'0\_CpE.

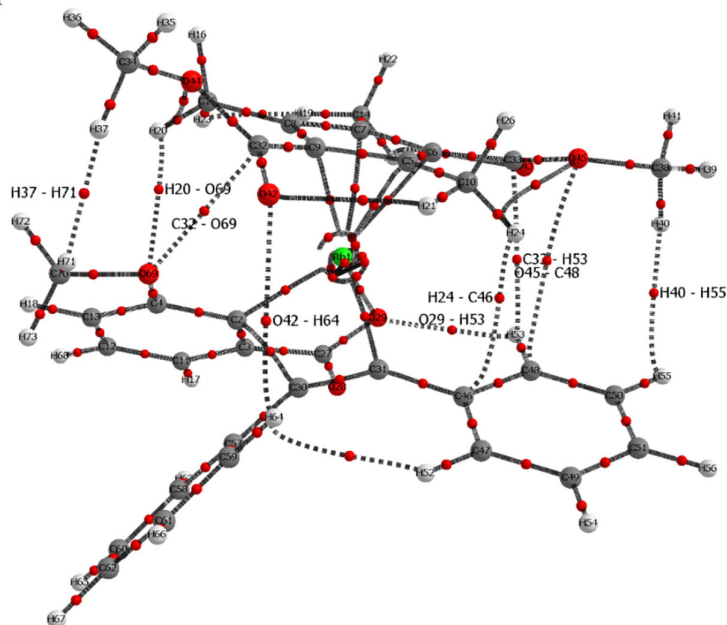

| Transition state | BCP     | $\rho(r)$ | $\nabla^2\rho(r)$ | $H(r)$   |
|------------------|---------|-----------|-------------------|----------|
| TS1_T_CpE        | H37-H71 | 0.005682  | 0.026869          | 0.001964 |
|                  | H20-O69 | 0.008287  | 0.034508          | 0.001783 |
|                  | C32-O69 | 0.009328  | 0.039216          | 0.001714 |
|                  | O42-H64 | 0.001797  | 0.007456          | 0.000506 |
|                  | O29-H53 | 0.006375  | 0.028574          | 0.001706 |
|                  | H24-C46 | 0.006146  | 0.023750          | 0.001625 |
|                  | O45-C48 | 0.004077  | 0.014532          | 0.000768 |
|                  | C33-H53 | 0.004192  | 0.018712          | 0.001315 |
|                  | H40-H55 | 0.002674  | 0.012316          | 0.000996 |

**Figure S26.** Theoretical molecular graph and calculated parameters of the electron density distribution at the selected bond critical points for TS1\_T\_CpE.



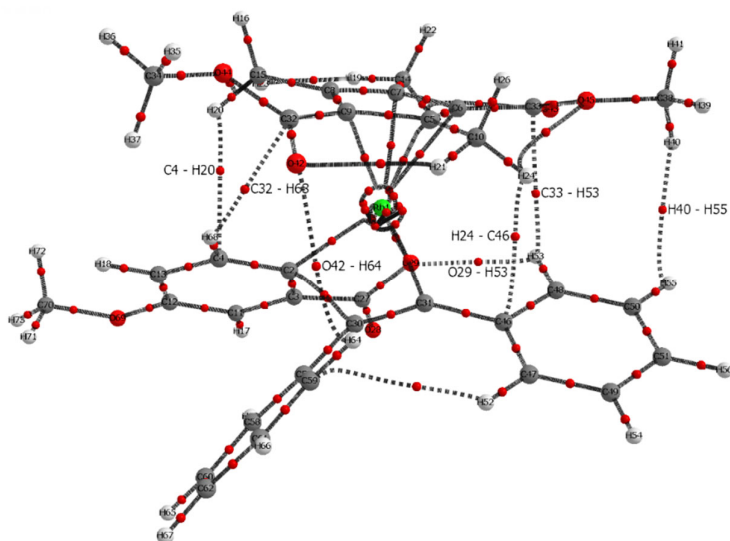

| Transition state | BCP     | $\rho(r)$ | $\nabla^2\rho(r)$ | $H(r)$   |
|------------------|---------|-----------|-------------------|----------|
| TS'1_T_CpE       | C4-H20  | 0.006590  | 0.023777          | 0.001429 |
|                  | C32-H68 | 0.005533  | 0.024324          | 0.001549 |
|                  | O42-H64 | 0.003001  | 0.012862          | 0.000849 |
|                  | O29-H53 | 0.006890  | 0.031318          | 0.001844 |
|                  | H24-C46 | 0.004948  | 0.019235          | 0.001352 |
|                  | C33-H53 | 0.005472  | 0.024011          | 0.001607 |
|                  | H40-H55 | 0.002960  | 0.013248          | 0.001059 |
|                  | H40-H55 | 0.002674  | 0.012316          | 0.000996 |

**Figure S27.** Theoretical molecular graph and calculated parameters of the electron density distribution at the selected bond critical points for TS'1\_T\_CpE.

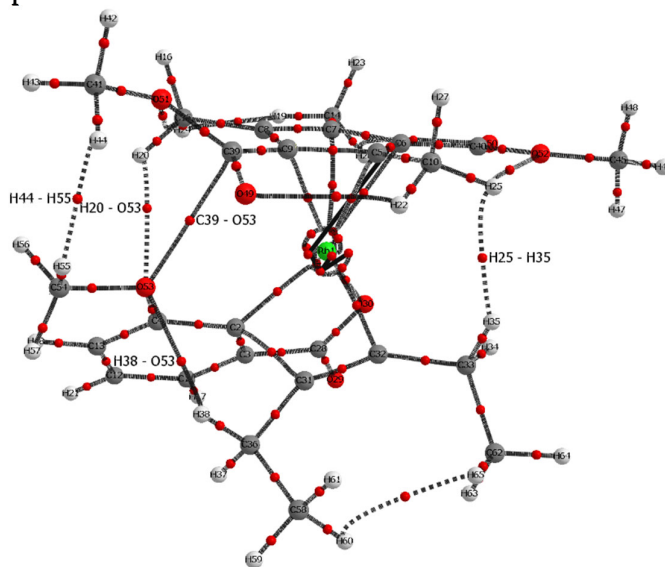

| Transition state | BCP     | $\rho(r)$ | $\nabla^2\rho(r)$ | $H(r)$   |
|------------------|---------|-----------|-------------------|----------|
| TS1_H_CpE        | H44-H55 | 0.005585  | 0.026770          | 0.001924 |
|                  | H20-O53 | 0.007718  | 0.031778          | 0.001633 |
|                  | C39-O53 | 0.010323  | 0.043411          | 0.001814 |
|                  | H38-O53 | 0.013696  | 0.059812          | 0.002582 |
|                  | H25-H35 | 0.006021  | 0.026651          | 0.001898 |

**Figure S28.** Theoretical molecular graph and calculated parameters of the electron density distribution at the selected bond critical points for TS1\_H\_CpE.
